## Targeted DNA transposition using a dCas9-transposase fusion protein

Shivam Bhatt and Ronald Chalmers\*

School of Life Sciences,  
University of Nottingham,  
Queen's Medical Centre,  
Nottingham NG7 2UH,  
UK

\*To whom correspondence should be addressed.

Email: [chalmers@nottingham.ac.uk](mailto:chalmers@nottingham.ac.uk)

## **SUMMARY**

Homology directed genome engineering is limited by transgene size. Although DNA transposons are more efficient with large transgenes, random integrations are potentially mutagenic. Catalytically inactive Cas9 is attractive candidate for targeting a transposase fusion-protein because of its high specificity and affinity for its binding site. Here we demonstrate efficient Cas9 targeting of a mariner transposon. Targeted integrations were tightly constrained at two adjacent TA dinucleotides about 20 bp to one side of the gRNA binding site. Biochemical analysis of the nucleoprotein complexes demonstrated that the transposase and Cas9 moieties of the fusion protein can bind their respective substrates independently. In the presence of the Cas9 target DNA, kinetic analysis revealed a delay between first and second strand cleavage at the transposon end. This step involves a significant conformational change that may be hindered by the properties of the interdomainal linker. Otherwise, the transposase behaved normally and was proficient for integration *in vitro* and *in vivo*.

## INTRODUCTION

Biotechnology and medicine are increasingly reliant on our ability to engineer the mammalian genome. Lentiviruses are useful because gene-delivery across the cell membrane is efficient and integration of the viral genome provides long-term transgene expression. However, they are mutagenic because they integrate at random sites using a mechanism similar to the cut-and-paste transposons. An alternative strategy for *ex vivo* applications is to establish genomic safe-havens for site-specific recombinases such as the phage C31 integrase or the Cre recombinase (Branda and Dymecki, 2004; Song and Palmiter, 2018). This approach lacks flexibility because it is limited to transgene integration at a predetermined site.

Scar-less engineering of a target site must rely on the cells homologous recombination machinery. Although desired modifications can be made very precisely, the events are rare and difficult to recover. One way to boost the rate of recombination by orders of magnitude is to make a DNA double strand break at the target site (Urnov et al., 2005). This can be achieved using zinc finger nucleases and transcription activator-like effector (TALE) nucleases, which can themselves be engineered to target a user-defined site (Chandrasegaran and Smith, 1999; Zhang et al., 2011). Two significant problems are the extended lead-times and off-target cleavages. TALE and zinc finger nucleases have now been largely superseded by the Cas9 nuclease. It can be programmed to target a 20 bp recognition sequence, simply by providing a matching guide RNA (gRNA). Off-target cleavage is relatively low and the long recognition sequence provides ample specificity. However, homologous recombination remains a limiting factor because the efficiency falls off as the transgene size increases (Li et al., 2014).

Transposon vectors are widely used for gene delivery applications (Grabundzija et al., 2010; Lamberg et al., 2002; Liang et al., 2009; Mates et al., 2009; Way et al., 1984). Although their efficiency falls off as the cargo

size is increased, they are less sensitive to this parameter than host-mediated homologous recombination (Balciunas et al., 2006; Claeys Bouuaert et al., 2013; Ding et al., 2005; Izsvak et al., 2000; Lohe and Hartl, 1996). However, like the Lentiviruses, transposon vectors are mutagenic because the integration sites are essentially random.

To combat random integration various groups have used site-specific DNA binding proteins to target specific loci. Examples include Mos1, Sleeping Beauty, piggyBac and ISY100, which were variously fused to zinc finger proteins, TALEs and Gal4 (Feng et al., 2010; Ivics et al., 2007; Luo et al., 2017; Maragathavally et al., 2006; Owens et al., 2013; Yant et al., 2007). Although successful, targeting strategies have all me with significant problem: namely, that the transposases are still capable of random integration. Since, DNA binding proteins, such as zinc fingers and TALEs, spend most of their time searching for their binding sites, targeted integrations are recovered against a background of random events. To tackle this problem we are currently developing a switchable transposase, which allows control over the timing of integration. In parallel, we were considering the advantages of potential targeting moieties. Cas9 is an obvious and attractive candidate because extensive base pairing with the target provides a dwell time of several hours (Ma et al., 2016). In contrast, DNA binding proteins remain bound to their specific sites only for a matter of seconds or minutes.

Previously, there was an unsuccessful attempt to use a catalytically inactive Cas9 (dCas9) to target piggyBac insertions to a hypoxanthine phosphoribosyl transferase (HPRT) gene in human cells (Luo et al., 2017). Surprisingly, instead of targeting the HPRT locus, the dCas9-piggyBac chimera protected it from insertions. We therefore set out to test whether Cas9 is a general inhibitor of transposition or whether the effect is peculiar to piggyBac. The choice of the transposase moiety is limited by several factors. Although Tn5 is very active in vitro, and is used extensively in bacteria, it transposes poorly in mammalian cells (Blundell-Hunter et al., 2018). Sleeping Beauty is efficient

in vivo but lacks an in vitro system (Mates et al., 2009). While piggyBac is probably the most efficient for gene delivery in vivo, it has a poor in vitro system (Liang et al., 2009; Mitra et al., 2008), which precludes the development of advanced applications such as direct delivery of transpososomes.

Our model system is based on Hsmar1, a reconstituted mariner-family transposon (Miskey et al., 2007; Robertson and Zumpano, 1997). Although it is not as active as piggyBac or Sleeping Beauty in cell culture transfection experiments, the reaction is 100% efficient in vitro (Claeys Bouuaert and Chalmers, 2017). Furthermore, if the mariner transpososome is assembled in vitro, it can be delivered cells directly (Trubitsyna et al., 2017). Hsmar1 also has much lower non-specific nuclease activity than other mariner elements such as Mos1, Mboumar1 and Himar1 (Claeys Bouuaert and Chalmers, 2010; Dawson and Finnegan, 2003; Lampe et al., 1996; Lipkow et al., 2004; Munoz-Lopez et al., 2008; Trubitsyna et al., 2015).

## **MATERIALS AND METHODS**

DNA oligonucleotides and most dry chemicals were from Sigma Aldrich. Enzymes were from New England Biolabs and DNA purification kits were from Qiagen. The nucleotide sequences of all plasmids used in this work are given in Supplemental Table 1. The  $\beta$ -galactosidase assays were as described by Miller (Miller, 1972). LB agar indicator plates contained 40  $\mu$ g/ml X-gal, when present, .

For in vivo assays, dCas9 was expressed from derivatives of plasmid pdCas9 (Bikard et al., 2013). When present, CRISPR spacers were cloned into the BsaI site as oligoduplexes (Supplemental Table 2). The Hsmar1 transposase gene was added to the 5'- or 3'-end of the dCas9 gene by PCR using pdCas9 and pRC880 as templates: transposase-dCas9, pRC2302; dCas9-transposases, pRC2303. An oligoduplex encoding spacer-7 was cloned into

the CRISPR locus of these plasmids to produce pRC2304 and pRC2305, respectively. The native wild type transposase was expressed from pRC2306, which is identical to pdCas9 except that the dCas9 gene is replaced by the transposase gene.

The transcription-strength series of expression vectors for Figure 2C, D was created using the constitutive promoters described by Tellier and Chalmers (Tellier and Chalmers, 2018). In the plasmid with the strongest promoter, P4 (pRC2309), the native *S. pyogenes* Cas9 promoter in pdCas9 was replaced by Tellier-P2. In plasmid P3 (pRC2308) the *S. pyogenes* promoter was replaced by Tellier-P1. In plasmid P2 (pRC2307) the *S. pyogenes* promoter was deleted by inverse PCR and residual transcription was from a cryptic promoter(s). The plasmid with the lowest level of transcription, P1 (pRC2311), was created by replacing the multi-copy origin-of-replication in plasmid P3 (above) with a single-copy origin-of-replication from a bacterial artificial chromosome vector.

Hsmar1 transposase was expressed from pRC880 and purified as a maltose binding protein (MBP) fusion by affinity chromatography as described (Claeys Bouuaert and Chalmers, 2010; Claeys Bouuaert et al., 2011). The expression vector for the dCas9-transposase fusion protein was pRC2303 described above.

The dCas9-transposase fusion-protein was expressed from the constitutive promoter in pRC2303. The plasmid was transformed into *E. coli* NiCo21 (New England Biolabs). A single colony was picked into a starter culture of LB-Lennox supplemented with 30 µg/mL chloramphenicol and grown at 37°C for 16 hours with shaking at 250 rpm in a baffled Erlenmeyer flask. The culture was diluted 1:100 into fresh media and growth was continued until the OD600 reached 0.5. The temperature was then reduced to 18°C and the incubation was continued for 16 hours. Cell (500 ml) were harvested by centrifugation at 4°C and resuspended in 40 ml binding buffer (20 mM Tris, pH 8.0, 5 mM imidazole, 0.5 M sodium chloride, 2 mM DTT). All subsequent

steps were carried out at 4°C. Cells were lysed by five passes through a French pressure cell at 16,000 psi and the extract was clarified by centrifugation at 40,000 x g for 30 minutes. The clarified extract was applied to a 1 mL HisTrap HP column (GE Life Sciences) on an AKTA FPLC (Amersham Pharmacia). The column was equilibrated with binding buffer and loosely bound proteins were eluted with 40 column volumes of wash buffer (20 mM Tris at pH 8.0, 60 mM imidazole, 0.5 M sodium chloride, 2 mM DTT). The column was then developed with a 20 column-volume linear-gradient up to 1 M imidazole. Peak fractions were pooled and analyzed by SDS polyacrylamide gel electrophoresis (Supplemental Figure 1). When required for in vitro reactions, the sgRNA and Cas9-transposase were assembled into a ribonucleoprotein complex by incubating for 20 minutes at room temperature in dCT binding buffer (20 mM HEPES pH 7.5, 250 mM potassium chloride, 2 mM MgCl<sub>2</sub>, 0.01 % Triton X-100, 0.1 mg/mL BSA, 10% glycerol ) (Anders et al., 2015). This was done every time it was required immediately before it was used.

The EMSA binding buffers for the native transposase and the dCas9-transposase were, respectively, [20 mM HEPES at pH 7.5, 100 mM NaCl, 2 mM DTT, 10 % glycerol, 5 % DMSO, 5 mM CaCl<sub>2</sub>, 250 µg/ml BSA] and [20 mM HEPES pH 7.5, 250 mM potassium chloride, 2 mM MgCl<sub>2</sub>, 0.01 % Triton X-100, 0.1 mg/mL BSA, 10% glycerol]. Reactions (20 µl) contained 10 nM of a Cy-5 labeled oligoduplex encoding either the transposon end or the target of the sgRNA (Supplemental Table 3). After addition of the dCas9-sgRNA-transposase complex, the reactions were incubated for 20 minutes at 37°C. Binding reactions with the native transposase were incubated for 60 minutes at room temperature to be consistent with our previous work. Binding reactions were loaded onto a TBE buffered 7% polyacrylamide gel and electrophoresed at 120 V. Gels were recorded on a GE Typhoon imager.

In vitro transposition reactions were performed as described (Claeys Bouuaert and Chalmers, 2010). The reaction buffer contained 25 mM Tris-HCl at pH 8.0, 5% glycerol, 100 mM sodium chloride, 2 mM DTT, 2.5 mM MgCl<sub>2</sub> and 6.5

nM of supercoiled pRC650 as substrate. Transposition reactions (50  $\mu$ l) were initiated by the addition of transposase and incubated for 4 h at 37°C. Reactions were made 0.4% in SDS and 19 mM in EDTA and heat inactivated at 75°C for 30 minutes. Samples (35  $\mu$ l) were electrophoresed on a TBE buffered 1.1% agarose gel at 60 V for 16 – 24 h. Gels were stained with ethidium bromide and photographed. In vivo transposition reactions were performed as described (Liu and Chalmers, 2014). The reporter strain [*E. coli* RC5096, F- *fhuA2*  $\Delta$ (*lacZ*)*r1* *glnV44* *e14*-(*McrA*-) *trp-31* *his-1* *rpsL104* *xyl-7* *mtl-2* *metB1*  $\Delta$ (*mcrC*-*mrr*)114::*IS10* *argE*::*Hsmar1-lacZ'*-*kanR*] was derived from ER1793 (New England Biolabs).

Targeted transposition experiments were based on a well known 'plasmid-hop' assay eg. (Munoz-Lopez et al., 2008). The transposon donor plasmid was pRC704, which encodes an R6K origin of replication and a mini-Hsmar1 transposon with a kanamycin resistance gene. The small target plasmid was pRC2312, which is essentially a dimer of pBluescript II SK+ with one of the copies of *lacZ* $\alpha$  removed. The large target was pRC2313, which is identical to the small target except that a 4.5 kb fragment of non-specific DNA from the *E. coli* chromosomal *argE*-H locus was inserted. Reactions (15  $\mu$ l) were performed in our standard transposition buffer (25 mM Tris-HCl at pH 8.0, 5% glycerol, 100 mM sodium chloride, 2 mM DTT, 2.5 mM MgCl<sub>2</sub>) with 9 nM of target plasmid and 13.5 nM pRC1105 to provide a background of non-specific DNA. Reactions were incubated for 20 minutes at 37°C, initiated by the addition of the transposon donor plasmid (9 nM) and incubated for a further 24 hours. Reactions were brought to 50  $\mu$ l with NEB Cutsmart buffer, supplemented with 5 units of NheI and 5 units of lambda exonuclease to degrade the non-specific plasmid. Digestion was stopped by adding 15  $\mu$ l of stop solution (0.5 mg/mL proteinase K, 0.1% SDS, 50 mM EDTA) and incubating at 60°C for 2 h. DNA was purified using a spin column from the Qiagen PCR Clean-up kit, which was eluted with 30  $\mu$ l of EB (10 mM Tris-HCl, pH 8.5). 3-10  $\mu$ l of the reaction was transformed into chemically competent *E. coli* NEB5 $\alpha$  and plated on LB agar plates supplemented with 50  $\mu$ g/ml kanamycin, 100  $\mu$ g/ml ampicillin, 40  $\mu$ g/ml X-gal and 0.1% lactose. Targeting efficiency (%) was calculated by dividing the number of white colonies by the



total number of colonies and multiplying by 100. Target plasmids from randomly selected white colonies were purified and the location of the transposon insertion in *lacZ* $\alpha$  was determined by Sanger sequencing using the M13 reverse primer.

## RESULTS

### Selection of gRNAs and construction of transposase-dCas9 fusions

Since gRNAs do not all bind their targets equally well (Liu et al., 2016) we screened ten candidates for their ability to inhibit transcription of the target *lacZ* gene. Oligoduplex spacer sequences, encoding candidate gRNAs, were ligated into the CRISPR locus of plasmid pdCas9 (Figure 1A). Subsequent transcription and processing in vivo produces a mature gRNA, which forms a ribonucleoprotein complex with dCas9. The relative locations and orientations of the selected gRNA target-sequences are shown in Figure 1B. *E. coli* BL21 cells were transformed with each dCas9-gRNA expression plasmids separately and spread on X-gal indicator plates to test the ability of the gRNAs to inhibit transcription of *lacZ*. Only spacers 4 and 7 produced completely white colonies (not shown). Because spacer-7 is within the coding sequence of the gene, it was selected for all further experiments. To create a fusion protein capable of targeted transposition, the Hsmar1 transposase gene was added to the 5'- or the 3'- end of the dCas9 gene in pdCas9 (Figure 1A). Two versions of the fusion protein expression vectors were created, one with and one without spacer-7.

### The fusion-proteins are active in vivo

To test whether the fusion proteins were still capable of gRNA-mediated transcriptional repression, the four plasmids were transformed into *E. coli* BL21 and the *lacZ* activity was measured using the Miller assay (Figure 2A). There was little silencing with dCas9 or either of the fusion proteins in the absence of the gRNA. In the presence of the gRNA the N- and C- terminal

dCas9 fusion proteins both repressed lacZ expression effectively. We then used a bacterial transposition assay to test whether the transposase domain retained activity (Figure 2B). We also tested a plasmid in which the dCas9 gene in pdCas9 was substituted with the transposase gene. This provided a positive control in which transposase expression was driven by the same promoter as the fusion proteins. The rate of transposition was highest for the transposase-dCas9 plasmid, which has the transposase fused to the N-terminus of Cas9. This result should be interpreted with caution as Hsmar1 transposition is subject to over-production inhibition (OPI) whereby an increase in the transposase concentration beyond a low level decreases the rate of transposition (Claeys Bouuaert et al., 2013; Tellier and Chalmers, 2018). Since the promoter on pdCas9 is relatively strong, the system will be dominated by OPI. In the presence of the gRNA the rate of transposition for the N- and C-terminal fusion proteins decreased significantly (Figure 2B). If this result is interpreted in terms of the OPI model, it indicates that the gRNA increased the transpositional-potential of the system, which decreased the rate of transposition on account of OPI. Since the dCas9-transposase protein, which has the transposase on the C-terminus of dCas9, had the best transpositional-potential and the best transcriptional repression in the Miller assay, it was selected for all further experiments (Figure 2A, B).

To explore the relationships between the expression level of the fusion protein and its activities, the native Cas9 promoter in pdCas9 was replaced with promoters P4 to P1, which are of progressively lower strength (Tellier and Chalmers, 2018). As expected, transcriptional repression by the fusion protein was highest with the native Cas9 promoter and decreased progressively with promoter strength (Figure 2C). In contrast, the rate of transposition had an inverse relationship to the strength of the promoter, consistent with the expected effects of OPI mentioned above (Claeys Bouuaert et al., 2013).

### **dCas9-transposase binds transposon ends and the gRNA target**

The assembly pathway for the Hsmar1 transpososome and its behavior in an

electrophoretic mobility shift assay (EMSA) is illustrated in Figure 3A, B. Binding of the first transposon end to the transposase dimer yields single-end complex 2 (SEC2). Recruitment of a second end yields the paired-ends complex (PEC). This would normally be followed by the first cleavage step of the reaction, except that the binding buffer lacks the catalytic magnesium ion. During electrophoresis, the PEC decays into single-end complex 1 (SEC1) (Claeys Bouuaert et al., 2013). When the purified dCas9-transposase is titrated into the reaction the disappearance of the free transposon ends is accompanied by the appearance of two clear shifted bands plus a third band close to the bottom of the well (Figure 3C). This is broadly similar to the behavior of the wild type transposase except that the complexes are further up the gel owing to the much larger size of the fusion protein. The band that just enters the gel above SEC2 might represent the PEC, which is detected in some experiments with the wild type transposase (Claeys Bouuaert et al., 2013).

To explore the binding ability of the dCas9 moiety of the fusion protein, an EMSAs was performed with an oligoduplex complimentary to the spacer-7 sequence (Figure 3D, E, F). Since this experiment was performed in vitro we used a single-guide RNA (sgRNA) in which the tracrRNA and the gRNA were joined in a single strand. In the absence of the sgRNA, titration of the fusion protein produced a smear with no clear bands (Figure 3D). Presumably, this indicates weak interactions between the protein and the DNA, which dissociate during electrophoresis. When the fusion protein was provided with the sgRNA, two clear complexes were formed (Figure 3E). The stoichiometry of the complexes is unknown but they may correspond to a dimer of the fusion protein bound by either one or two target oligoduplexes. When we added unlabeled competitor DNA to the reaction it had not effect, which indicates that the oligoduplex binding to the fusion protein is specific (Figure 3F).

### **In vitro transposition with the dCas9-transposase fusion-protein**

Since we had demonstrated DNA binding by the respective dCas9 and

transposase moieties of the fusion protein we next wanted to examine the intermediates and products of the *in vitro* transposition reaction. When the wild type transposase is incubated with a supercoiled substrate, excision of the transposon leaves behind the plasmid backbone, which is an end product of the reaction and a convenient measure of the efficiency (Figure 4). After excision, target sites for integration are acquired by a random collision and tracking mechanism (Claeys Bouuaert and Chalmers, 2010). Titration of the reaction with the wild type transposase or dCas9-transposase yielded a very similar range of products (Figure 4). Minor differences were probably owing to the differences in the quality of the purified proteins. However, adding an oligoduplex encoding the target of the sgRNA reduced the amount of protein required for the maximum production of backbone. It also changed the amount and relative proportions of the reaction products. Most noticeable is the accumulation of the relaxed substrate. This is an intermediate of the reaction generated by the first nick at one of the transposon ends (Claeys Bouuaert and Chalmers, 2010; Claeys Bouuaert et al., 2014). The transition between the first nick and the second, which completes cleavage at the transposon end, involves a significant conformational change (Claeys Bouuaert and Chalmers, 2017; Dornan et al., 2015). Since nicking is absolutely dependent on PEC formation (Claeys Bouuaert et al., 2011), the accumulation of the relaxed intermediate shows that the dCas9 moiety of the fusion protein can interact with its oligoduplex target at the same time as the transposase moiety is engaged in a transposition reaction. Clearly, this is a prerequisite for successful targeting.

### **Targeted transposition reactions**

To test whether the dCas9-transposase protein could target transposon insertions to a specific site *in vitro* we used a modification of the mini-transposon hop assay (Munoz-Lopez et al., 2008). In this assay, transposase catalyses the movement of a transposon encoding a kanamycin resistance gene onto a target plasmid, which in this case encodes the lacZ $\alpha$  fragment and an ampicillin resistance gene (Figure 5A). The target was derived from a

dimer of pBluescript in which one of the two *lacZα* fragments had been removed. Since the plasmid has two ampicillin genes and two origins, it has no essential regions and can tolerate insertions anywhere. This allows unbiased recovery of integration events. We refer to the modified pBluescript dimer as the small target. We also created a larger target by adding 4.5 kb of DNA from the *E. coli* arginine biosynthesis operon. In addition to the transposon donor and target plasmids, transposition reactions also contained a decoy plasmid which provides a background level of non-specific DNA. The reactions were assembled and then initiated by the addition of the transposon donor plasmid.

Transposition reactions were performed with the wild type transposase and the dCas9-transposase fusion-protein either without or with sgRNA-7, which is complementary to the *lacZα* region of the target plasmids. The integration products were transformed into *E. coli* NEB5α and plated on LB agar plates supplemented with ampicillin, kanamycin and X-gal (Figure 5B, C). Double transformants containing the donor and target plasmids are not recovered because the R6K origin of replication requires the Pir protein. Transposition reactions with the wild type transposase or the dCas9-transposase fusion yielded very few white colonies (Figure 5B). This reflects the fact that the *lacZα* fragment represents only about 1/650<sup>th</sup> of the DNA sequences available for integration. In contrast, more than half of the colonies are white when the dCas9-transposase protein is provided with the sgRNA. The targeting efficiency is plotted in Figure 5C where it is defined as the percentage of all colonies that were white.

In the case of the blue colonies, the transformants must have contained plasmids with transposon insertions outside of the *lacZα* region. We therefore focused on the white colonies and used DNA sequencing to determine the transposon integration sites (Figure 5D). In pBluescript the *lacZα* open reading frame (ORF) is engineered to include a polylinker and it is therefore longer than the corresponding region from the wild type *lacZ* gene. The ORF

also codes for additional amino acids at the 3'-end that are not necessary for alpha complementation (Nishiyama et al., 2015). All in all, the target region in pBluescript in which integration events will yield a white phenotype is 315 bp long (Figure 5D). Within this region there are 18 TA dinucleotides, which are required for the integration of mariner transposons. Only eight of these sites are represented amongst the 20 un-targeted integrations mapped for the wild type transposase and the dCas9-transposase fusion without the sgRNA (Figure 5D). This is not unusual as mild integration bias is well documented for the mariner transposons, where preferred sites are known as hot spots (Claeys Bouuaert and Chalmers, 2013; Conte et al., 2019; Crenes et al., 2009).

We next examined the lacZα integration sites targeted by the dCas9-sgRNA-transposase. We found that all had occurred at two TA dinucleotides located 18 to 22 bp to one side of the sgRNA binding site (Figure 5D, E). On the other side of the binding site there are TA dinucleotides between 8 and 18 bp distant that were not used. The location of the integration sites immediately to one side of the binding site probably reflects constraints imposed by the relative orientations of the dCas9 and the transposase domains and the length of the linker region. It will be interesting to test the site-preference of the transposase-dCas9 fusion, in which the positions of the domains are swapped with respect to the N- and C-termini of the protein.

## **DISCUSSION**

The long dwell time of dCas9 at its target site makes it a powerful tool for gene activation and repression (Gilbert et al., 2014). It is also an attractive candidate for transposon targeting. However, one study reported that although piggyBac integrations at a specific target site were enriched by zinc finger and TALE protein-fusions, dCas9 appeared to protect the locus (Luo et al., 2017). In the present work we have demonstrated that a mariner transposon can be effectively targeted by dCas9 and that protection from integration is probably therefore peculiar to piggyBac. We found that the

targeted mariner insertions were at two adjacent TA dinucleotides about 20 bp 5' to the sgRNA binding site (Figure 4E). Other TA dinucleotides located between 31 and 34 bp 5', and between 8 and 18 bp 3', of the sgRNA binding sites were not used. This indicates that the integration site is tightly constrained.

The properties of the inter-domainal linker and the intrinsic target-site preference of the transposase may both contribute to the constrained selection of integration sites. Most, if not all, DNA transposons have preferred target hot spots. For example, there is one extremely hot spot for Mos1 integration that attracts almost all events in the Tn9 chloramphenicol acetyl transferase gene (Crenes et al., 2009). Hsmar1 is perhaps less biased but some sites are certainly less preferred than others (Claeys Bouuaert and Chalmers, 2013). To link the dCas9 and Hsmar1 transposase domains we used a sequence of 187 amino acids encoding the *E. coli* thioredoxin protein. Although this will be less prone to proteolysis than a flexible linker of the same length, the compaction due to elements of secondary and tertiary structure will prevent the transposase domain reaching distant sites. The linker may also constrain the orientation of the transposase domain with respect to dCas9 and its binding site. However, since the two targeted TA dinucleotides are 4 bp apart they will be on almost opposite faces of the DNA helix. This indicates that the angular distribution is not tightly constrained. Nevertheless, it will be interesting to engineer additional TA dinucleotides into the sequence to explore the constraint further. It will also be interesting to use flexible linkers of different lengths.

In targeting experiments with other transposase-fusion proteins the selection of integration sites was not tightly constrained as observed here. Fusing Mos1 or piggyBac transposases to Gal4 using a 22 amino acid linker enriched for integration sites about 900 bp away from the Gal4 upstream activating sequence (UAS). In the case of Mos1, 98% of the integrations were at a TA dinucleotide 954 bp from the binding site (Maragathavally et al., 2006). Such frequent use of a site, almost 10 DNA-persistence-lengths away from the Gal4-UAS, can not be explained by the constraints of the binding moiety.

Instead, a combination of factors may be at work. For example, the short dwell time of DNA binding proteins, which range from seconds to minutes, will increase the local concentration of the transpososome, which may then select a nearby hot spot. This scenario may also explain the partial enrichment of AAV Rep-Sleeping Beauty integration at a site 700 bp from the Rep recognition sequence (Ammar et al., 2012). In another report, fusing the piggyBac transposase to zinc finger and TALE proteins with linkers as short as 15 amino acids enriched for integrations between 24 and 5000 bp from the binding site in the hypoxanthine phosphoribosyl transferase (HPRT) gene (Luo et al., 2017; Owens et al., 2013). Within this region, integrations were biased towards the HPRT transcriptional start site. This may be owing to the chromatin configuration or topological changes in the DNA. For example, mariner transposition is sensitive to supercoiling in the transposon donor and the target (Claeys Bouuaert and Chalmers, 2013; Claeys Bouuaert et al., 2011).

In addition to the targeting experiments, we also compared the reaction intermediates with the transposase and the dCas9-transposase proteins (Figure 2, 3). In the EMSA, the nucleoprotein complexes were very similar (Figure 2). Likewise, in reactions with a transposon on a plasmid substrate, the kinetics of the reaction intermediates were similar (Figure 3). However, there was a slight delay between first and second strand cleavage at the transposon end when the target of the sgRNA was included in the reaction. Overall, it is clear that the Hsmar1 transposase behaves normally when fused to dCas9 and that dCas9 is therefore a promising system for targeted integration. The single biggest problem in targeted-transposition protocols is that successful targeting in a particular cell is often accompanied by random integrations. It should be possible to minimize this problem delivering the transpososome to the cells after in vitro assembly (Trubitsyna et al., 2017). However, to overcome random integration events, it will be necessary to control the timing of integration to allow an opportunity for the targeting moiety to find its binding site. This work is currently underway.



## REFERENCES

Ammar, I., Gogol-Doring, A., Miskey, C., Chen, W., Cathomen, T., Izsvak, Z., and Ivics, Z. (2012). Retargeting transposon insertions by the adeno-associated virus Rep protein. *Nucleic acids research* *40*, 6693-6712.

Anders, C., Niewoehner, O., and Jinek, M. (2015). In Vitro Reconstitution and Crystallization of Cas9 Endonuclease Bound to a Guide RNA and a DNA Target. *Methods in enzymology* *558*, 515-537.

Balciunas, D., Wangensteen, K.J., Wilber, A., Bell, J., Geurts, A., Sivasubbu, S., Wang, X., Hackett, P.B., Largaespada, D.A., Mclvor, R.S., *et al.* (2006). Harnessing a high cargo-capacity transposon for genetic applications in vertebrates. *PLoS genetics* *2*, e169.

Bikard, D., Jiang, W., Samai, P., Hochschild, A., Zhang, F., and Marraffini, L.A. (2013). Programmable repression and activation of bacterial gene expression using an engineered CRISPR-Cas system. *Nucleic acids research* *41*, 7429-7437.

Blundell-Hunter, G., Tellier, M., and Chalmers, R. (2018). Transposase subunit architecture and its relationship to genome size and the rate of transposition in prokaryotes and eukaryotes. *Nucleic Acids Research*, gky794-gky794.

Branda, C.S., and Dymecki, S.M. (2004). Talking about a revolution: The impact of site-specific recombinases on genetic analyses in mice. *Developmental cell* *6*, 7-28.

Chandrasegaran, S., and Smith, J. (1999). Chimeric restriction enzymes: what is next? *Biological chemistry* *380*, 841-848.

Claeys Bouuaert, C., and Chalmers, R. (2010). Transposition of the human Hsmar1 transposon: rate-limiting steps and the importance of the flanking TA dinucleotide in second strand cleavage. *Nucleic acids research* *38*, 190-202.

Claeys Bouuaert, C., and Chalmers, R. (2013). Hsmar1 Transposition Is Sensitive to the Topology of the Transposon Donor and the Target. *PLoS ONE* *8*, e53690.

Claeys Bouuaert, C., and Chalmers, R. (2017). A single active site in the mariner transposase cleaves DNA strands of opposite polarity. *Nucleic acids research* *45*, 11467-11478.

Claeys Bouuaert, C., Lipkow, K., Andrews, S.S., Liu, D., and Chalmers, R. (2013). The autoregulation of a eukaryotic DNA transposon. *eLife* *2*, e00668.

Claeys Bouuaert, C., Liu, D., and Chalmers, R. (2011). A simple topological filter in a eukaryotic transposon as a mechanism to suppress genome instability. *Molecular and cellular biology* *31*, 317-327.

Claeys Bouuaert, C., Walker, N., Liu, D., and Chalmers, R. (2014). Crosstalk between transposase subunits during cleavage of the mariner transposon. *Nucleic acids research* *42*, 5799-5808.

Conte, E., Mende, L., Grainge, I., and Colloms, S.D. (2019). A Mini-*ISY100* Transposon Delivery System Effective in  $\gamma$  Proteobacteria. *Frontiers in microbiology* *10*, 280-280.

Crenes, G., Ivo, D., Herisson, J., Dion, S., Renault, S., Bigot, Y., and Petit, A. (2009). The bacterial Tn9 chloramphenicol resistance gene: an attractive DNA segment for Mos1 mariner insertions. *Molecular genetics and genomics : MGG* *281*, 315-328.

Dawson, A., and Finnegan, D.J. (2003). Excision of the *Drosophila* mariner transposon Mos1. Comparison with bacterial transposition and V(D)J recombination. *Molecular cell* *11*, 225-235.

Ding, S., Wu, X., Li, G., Han, M., Zhuang, Y., and Xu, T. (2005). Efficient transposition of the piggyBac (PB) transposon in mammalian cells and mice. *Cell* *122*, 473-483.

Dornan, J., Grey, H., and Richardson, J.M. (2015). Structural role of the flanking DNA in mariner transposon excision. *Nucleic acids research* *43*, 2424-2432.

Feng, X., Bednarz, A.L., and Colloms, S.D. (2010). Precise targeted integration by a chimaeric transposase zinc-finger fusion protein. *Nucleic acids research* *38*, 1204-1216.

Gilbert, L.A., Horlbeck, M.A., Adamson, B., Villalta, J.E., Chen, Y., Whitehead, E.H., Guimaraes, C., Panning, B., Ploegh, H.L., Bassik, M.C., *et al.* (2014). Genome-Scale CRISPR-Mediated Control of Gene Repression and Activation. *Cell* *159*, 647-661.

Grabundzija, I., Irgang, M., Mates, L., Belay, E., Matrai, J., Gogol-Doring, A., Kawakami, K., Chen, W., Ruiz, P., Chuah, M.K., *et al.* (2010). Comparative analysis of transposable element vector systems in

human cells. *Molecular therapy : the journal of the American Society of Gene Therapy* *18*, 1200-1209.

Ivics, Z., Katzer, A., Stuwe, E.E., Fiedler, D., Knespel, S., and Izsvak, Z. (2007). Targeted Sleeping Beauty transposition in human cells. *Molecular therapy : the journal of the American Society of Gene Therapy* *15*, 1137-1144.

Izsvak, Z., Ivics, Z., and Plasterk, R.H. (2000). Sleeping Beauty, a wide host-range transposon vector for genetic transformation in vertebrates. *Journal of molecular biology* *302*, 93-102.

Lamberg, A., Nieminen, S., Qiao, M., and Savilahti, H. (2002). Efficient insertion mutagenesis strategy for bacterial genomes involving electroporation of in vitro-assembled DNA transposition complexes of bacteriophage  $\mu$ . *Applied and environmental microbiology* *68*, 705-712.

Lampe, D.J., Churchill, M.E., and Robertson, H.M. (1996). A purified mariner transposase is sufficient to mediate transposition in vitro. *The EMBO journal* *15*, 5470-5479.

Li, K., Wang, G., Andersen, T., Zhou, P., and Pu, W.T. (2014). Optimization of genome engineering approaches with the CRISPR/Cas9 system. *PLoS One* *9*, e105779.

Liang, Q., Kong, J., Stalker, J., and Bradley, A. (2009). Chromosomal mobilization and reintegration of Sleeping Beauty and PiggyBac transposons. *Genesis (New York, NY : 2000)* *47*, 404-408.

Lipkow, K., Buisine, N., and Chalmers, R. (2004). Promiscuous target interactions in the mariner transposon Himar1. *The Journal of biological chemistry* *279*, 48569-48575.

Liu, D., and Chalmers, R. (2014). Hyperactive mariner transposons are created by mutations that disrupt allosterism and increase the rate of transposon end synapsis. *Nucleic acids research* *42*, 2637-2645.

Liu, X., Homma, A., Sayadi, J., Yang, S., Ohashi, J., and Takumi, T. (2016). Sequence features associated with the cleavage efficiency of CRISPR/Cas9 system. *Scientific reports* *6*, 19675.

Lohe, A.R., and Hartl, D.L. (1996). Reduced germline mobility of a mariner vector containing exogenous DNA: effect of size or site? *Genetics* *143*, 1299-1306.

Luo, W., Galvan, D.L., Woodard, L.E., Dorset, D., Levy, S., and Wilson, M.H. (2017). Comparative analysis of chimeric ZFP-, TALE- and Cas9-piggyBac transposases for integration into a single locus in human cells. *Nucleic acids research* *45*, 8411-8422.

Ma, H., Tu, L.C., and Naseri, A. (2016). CRISPR-Cas9 nuclear dynamics and target recognition in living cells. *Journal of Cell Biology* *214*, 529-537.

Maragathavally, K.J., Kaminski, J.M., and Coates, C.J. (2006). Chimeric Mos1 and piggyBac transposases result in site-directed integration. *FASEB journal : official publication of the Federation of American Societies for Experimental Biology* *20*, 1880-1882.

Mates, L., Chuah, M.K., Belay, E., Jerchow, B., Manoj, N., Acosta-Sanchez, A., Grzela, D.P., Schmitt, A., Becker, K., Matrai, J., *et al.* (2009). Molecular evolution of a novel hyperactive Sleeping Beauty transposase enables robust stable gene transfer in vertebrates. *Nature genetics* *41*, 753-761.

Miller, J. (1972). *Experiments in Molecular Genetics*. Cold Spring Harbor Laboratory.

Miskey, C., Papp, B., Mates, L., Sinzelle, L., Keller, H., Izsvak, Z., and Ivics, Z. (2007). The ancient mariner sails again: transposition of the human Hsmar1 element by a reconstructed transposase and activities of the SETMAR protein on transposon ends. *Molecular and cellular biology* *27*, 4589-4600.

Mitra, R., Fain-Thornton, J., and Craig, N.L. (2008). piggyBac can bypass DNA synthesis during cut and paste transposition. *The EMBO journal* *27*, 1097-1109.

Munoz-Lopez, M., Siddique, A., Bischerour, J., Lorite, P., Chalmers, R., and Palomeque, T. (2008). Transposition of Mboumar-9: identification of a new naturally active mariner-family transposon. *Journal of molecular biology* *382*, 567-572.

Nishiyama, K., Ichihashi, N., Kazuta, Y., and Yomo, T. (2015). Development of a reporter peptide that catalytically produces a fluorescent signal through alpha-complementation. *Protein science : a publication of the Protein Society* *24*, 599-603.

Owens, J.B., Mauro, D., Stoytchev, I., Bhakta, M.S., Kim, M.S., Segal, D.J., and Moisyadi, S. (2013). Transcription activator like effector

(TALE)-directed piggyBac transposition in human cells. *Nucleic acids research* *41*, 9197-9207.

Robertson, H.M., and Zumpano, K.L. (1997). Molecular evolution of an ancient mariner transposon, Hsmar1, in the human genome. *Gene* *205*, 203-217.

Song, A.J., and Palmiter, R.D. (2018). Detecting and Avoiding Problems When Using the Cre-lox System. *Trends in genetics : TIG* *34*, 333-340.

Tellier, M., and Chalmers, R. (2018). Development of a papillation assay using constitutive promoters to find hyperactive transposases. *bioRxiv*, 423012.

Trubitsyna, M., Grey, H., Houston, D.R., Finnegan, D.J., and Richardson, J.M. (2015). Structural Basis for the Inverted Repeat Preferences of mariner Transposases. *The Journal of biological chemistry* *290*, 13531-13540.

Trubitsyna, M., Michlewski, G., Finnegan, D.J., Elfick, A., Rosser, S.J., Richardson, J.M., and French, C.E. (2017). Use of mariner transposases for one-step delivery and integration of DNA in prokaryotes and eukaryotes by transfection. *Nucleic acids research* *45*, e89.

Urnov, F.D., Miller, J.C., Lee, Y.L., Beausejour, C.M., Rock, J.M., Augustus, S., Jamieson, A.C., Porteus, M.H., Gregory, P.D., and Holmes, M.C. (2005). Highly efficient endogenous human gene correction using designed zinc-finger nucleases. *Nature* *435*, 646-651.

Way, J.C., Davis, M.A., Morisato, D., Roberts, D.E., and Kleckner, N. (1984). New Tn10 derivatives for transposon mutagenesis and for construction of lacZ operon fusions by transposition. *Gene* *32*, 369-379.

Yant, S.R., Huang, Y., Akache, B., and Kay, M.A. (2007). Site-directed transposon integration in human cells. *Nucleic acids research* *35*, e50.

Zhang, F., Cong, L., Lodato, S., Kosuri, S., Church, G.M., and Arlotta, P. (2011). Efficient construction of sequence-specific TAL effectors for modulating mammalian transcription. *Nature Biotechnology* *29*, 149.

## FIGURE LEGENDS

### Figure 1 Plasmid pdCas9 and the chromosomal *lacZ* target

**A)** Plasmid pdCas9 (Bikard et al., 2013) encodes a catalytically inactive Cas9 variant (dCas9) in which the nuclease activity is abolished by the D10A and H840A mutations. Expression is driven by the strong native Cas9 promoter from *Streptococcus pyogenes*. The spacer is the user-defined sequence that base pairs with the target site.

**B)** The target site for dCas9 binding was the *E. coli lacZ* gene. Ten candidate spacers were selected to target the promoter and early open reading frame of *lacZ*. Of these 10 candidates, only spacers 4 and 7 inhibited transcription completely, as judged by a white colony on X-gal indicator plates.

### Figure 2. Fusion-protein activity in vivo

The Hsmar1 transposase gene was added to the 5'- or the 3'- end of the dCas9 gene in pdCas9, which is illustrated in Figure 1A.

**A,** The plasmids were transformed into *E. coli* BL21 and *lacZ* activity was measured using the Miller assay (Miller, 1972). The *lacZ*- control was provided by *E. coli* NEB5 $\alpha$ , while LacZ+ is the activity with the untransformed BL21 host. Proteins were expressed from plasmids: dCas9, pdCas9 = pRC2301; transposase-dCas9, pRC2302; transposase-dCas9-gRNA, pRC2304; dCas9-transposase, pRC2303; dCas9-gRNA-transposase, pRC2305.

**B,** The relative rates of transposition supported by the N- and C-terminal fusions was assayed in *E. coli* as described previously (Liu and Chalmers, 2014). The wild type transposase was expressed from pRC2306, which is identical to pdCas9 except that the dCas9 gene is replaced by the transposase gene. Other protein expression vectors were as in part B.

**C,** The relationship between *lacZ* repression and the fusion-protein expression level was explored. The highest level of expression was with the native Cas9 promoter from pdCas9. Promoters P4 to P1 were progressively weaker (Tellier and Chalmers, 2018). The expression vectors were: P1,

pRC2311; P2, pRC2307; P3, pRC2308; P4, pRC2309.

**D**, The relationship between the expression level and the rate of transposition was explored. Owing to auto-inhibition (or OPI) the highest rate of transposition was with the lowest expression level, as expected (Claeys Bouuaert et al., 2013). Protein expression vectors were as in previous parts.

### **Figure 3 EMSA analysis of the dCas9-transposase fusion protein**

**A**, Illustration of protein-DNA complexes formed during the transposition reaction and decomposition of the paired-end complex (PEC) during electrophoresis.

**B**, EMSA of purified Hsmar1 transposase on a TBE buffered 7% polyacrylamide gel. Reactions contained 10 nM of a 70 bp Cy5-labelled oligoduplex encoding a transposon-end substrate. Bands were visualized on a GE Typhoon Fluorimager.

**C**, EMSA as in part B but with the indicated amounts of the dCas9-transposase fusion protein without sgRNA. The band marked ?, just below the wells, might represent the PEC, which is detected with the wild type transposase if the PEC is artificially stabilized (Claeys Bouuaert et al., 2013).

**D**, **E** and **F**, the EMSAs were as in part B but with the purified dCas9-transposase fusion protein with its sgRNA. Reactions contained 10 nM of a 70 bp Cy5-labelled oligoduplex complementary to sgRNA-7. When present, the sgRNA was preassembled in a 1:1.5 molar excess to the protein prior to the EMSA. The non-specific competitor plasmid was 1  $\mu$ g of pRC2301 per binding reaction.

### **Figure 4 *In vitro* transposition assays with the dCas9-transposase**

Transposition reactions were 50  $\mu$ l with 6.5 nM of supercoiled plasmid substrate (pRC650). The reactions were initiated by adding transposase and incubated for 4 h at 37°C. Reactions were deproteinated with proteinase K and SDS and 20  $\mu$ l was electrophoresed on a TBE buffered 1.1% agarose gel at 60 V overnight. Photographs of ethidium bromide stained gels are shown. When present, the sgRNA was preassembled in a 1:1.5 molar excess to the

protein prior to the reaction. Where indicated, reactions contained 10 nM of a 70 bp oligoduplex complementary to the sgRNA.

### **Figure 5 Transposon targeting reactions**

**A,** Illustration of the transposon donor and target plasmids. The donor plasmid (pRC704) encodes an Hsmar1 transposon with an R6K origin of recognition and a kanamycin resistance gene. The target plasmid (pRC2312) is essentially a dimer of pBluescript with one copy of the lacZ $\alpha$  gene removed. Since the plasmid has two origins and two ampicillin markers it can tolerate transposon insertions anywhere. The large target has an extra 4.5 kb of non-specific DNA. Reactions also contained a background of non-specific DNA.

**B,** Reactions were performed with the indicated transposase proteins, transformed into *E. coli* and plated on LB plus ampicillin, kanamycin and X-gal. Transposon integrations into the lacZ $\alpha$  gene yield white colonies. Integrations elsewhere yield blue colonies.

**C,** Targeting efficiency. Error-bars are standard error of the mean where n = 6 biological replicates. Ordinary one-way ANOVA analysis: Small target; transposase vs. dCas9-transposase,  $P = 0.95$ ; transposase vs. dCas9-sgRNA-transposase,  $P = <0.0001$ ; dCas9-transposase vs. dCas9-sgRNA-transposase,  $P = <0.0001$ . Large target: transposase vs. dCas9-transposase,  $P = 0.14$ ; transposase vs. dCas9-sgRNA-transposase,  $P = <0.0001$ ; dCas9-transposase vs. dCas9-sgRNA-transposase,  $P = <0.0001$ .

**D,** Ten white colonies were picked from the three sets of plates and the location of the transposon insertion determined by Sanger sequencing.

**E,** An expanded view of the indicated area of the lacZ $\alpha$  gene.



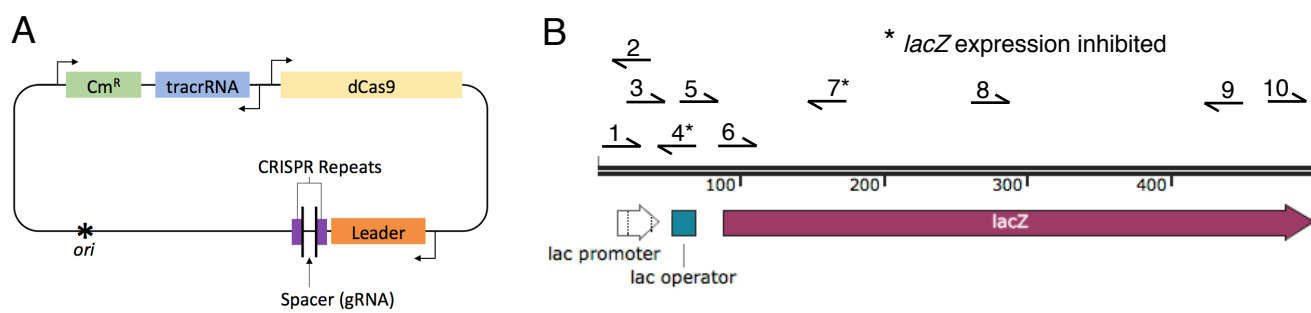

Figure 1

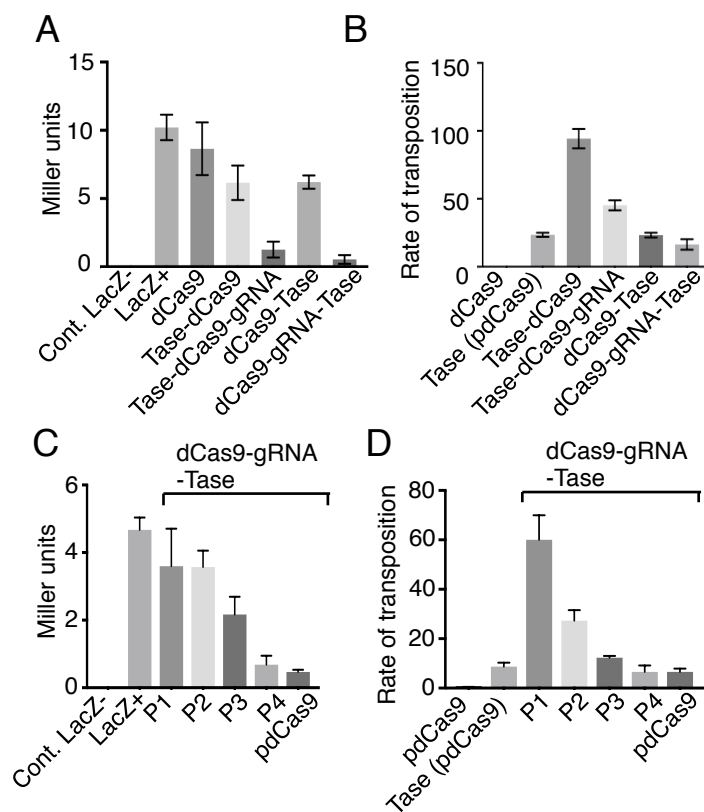

Figure 2

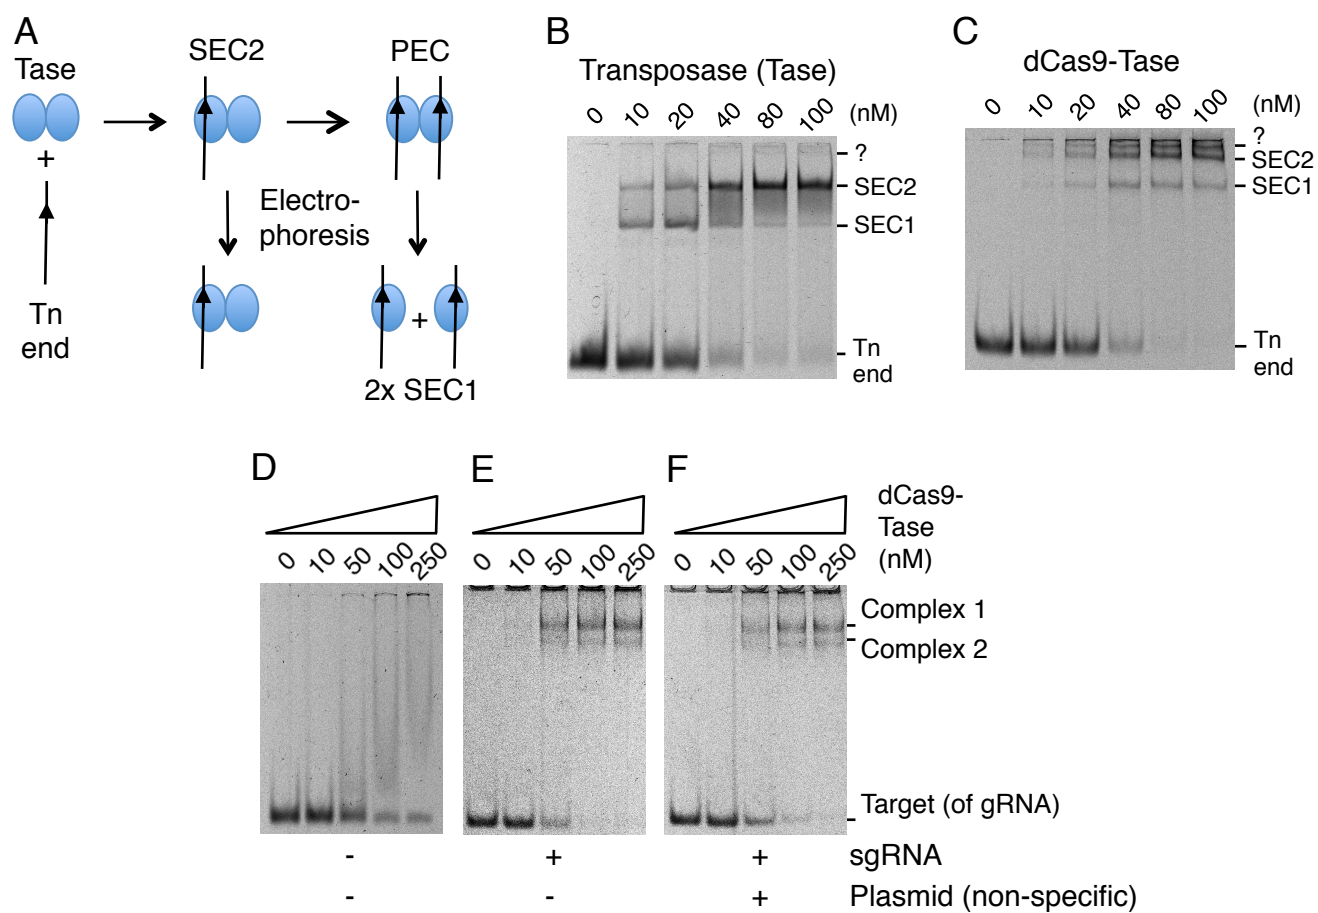

Figure 3

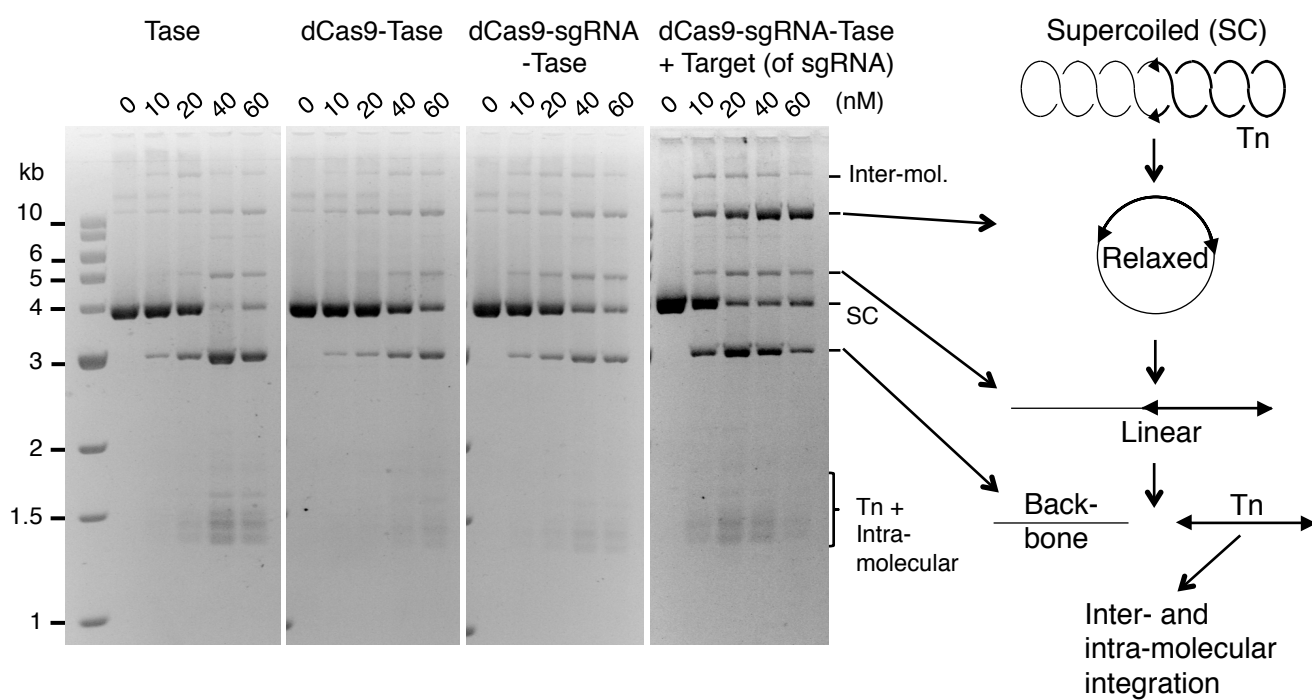

Figure 4

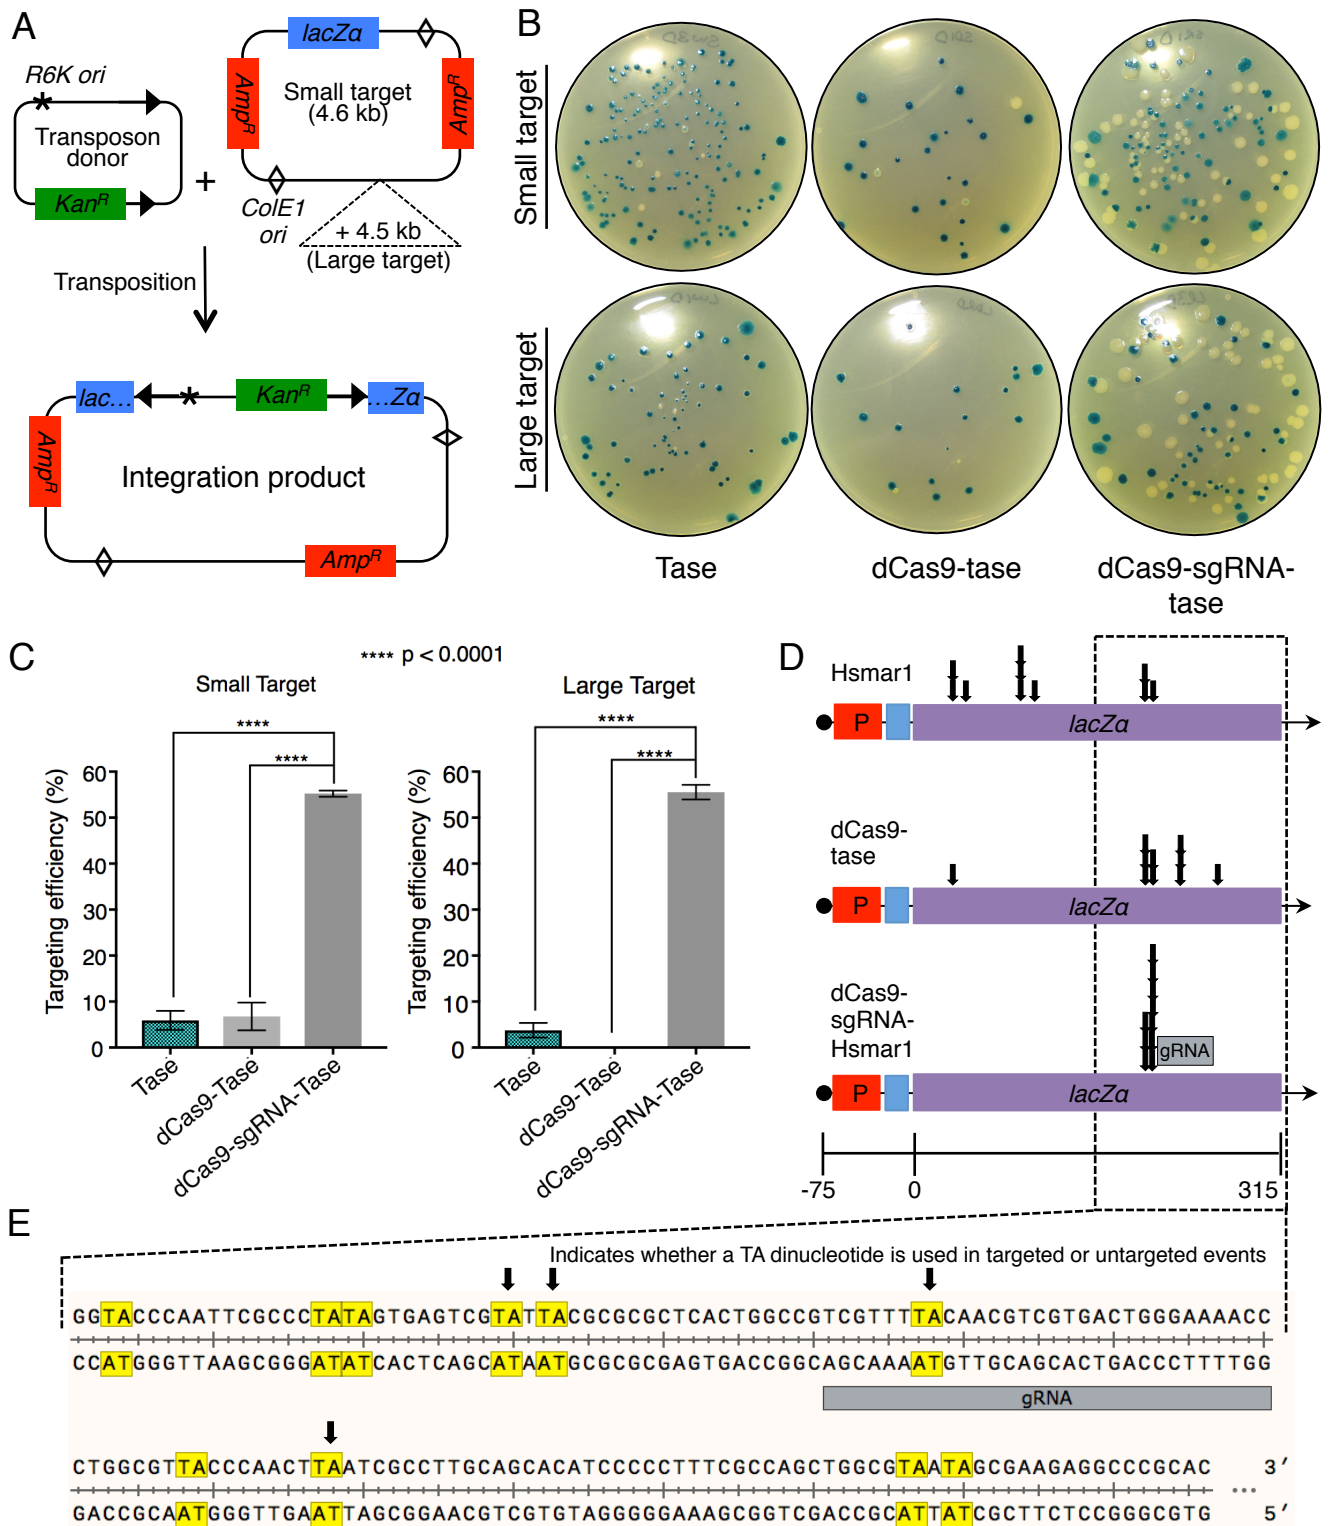

Figure 5

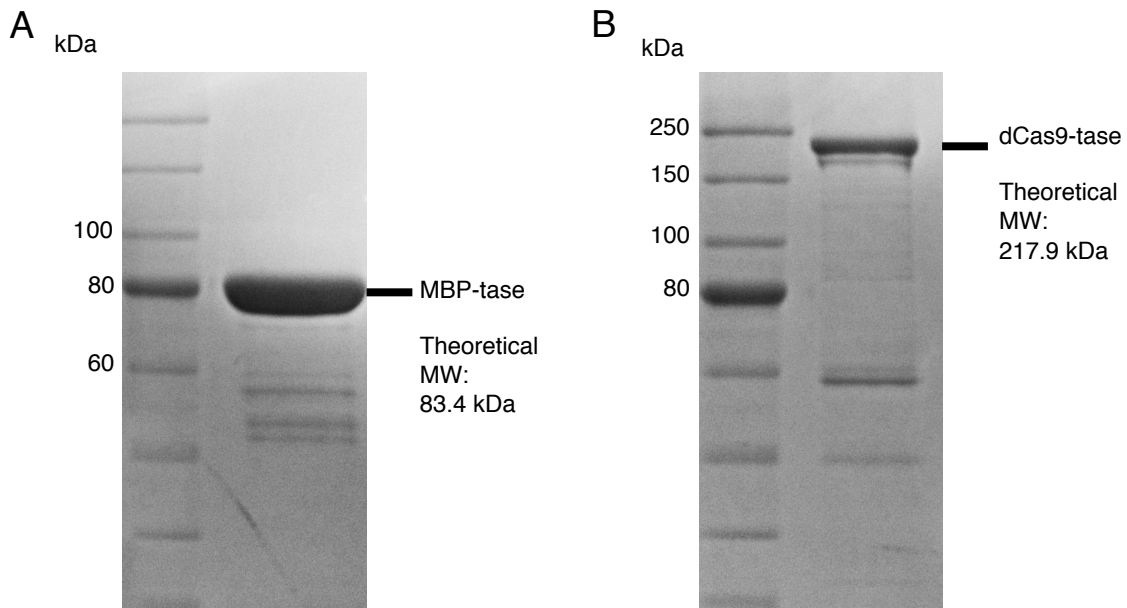

Supplemental Figure 1 Purification of Hsmar1 transposase and dCas9 transposase.

## Supplemental Table 1 Plasmid Sequences

pRC704

AATTCTATTAGGTTGGTGCAAAAGTAATTGCGGTTTTGGATCCGGCTGTAATCCG  
GGCAGCGCAACGGAACATTCATCAGTGTA AAAATGGAATCAATAAAGCCCTGCG  
CAGCGCGCAGGGTCAGCCTGAATACGCGTTTAATGACCAGCACAGTCGTGATG  
GCAAGGTCAGAATAGCGCTGAGGTCTGCCTCGTGAAGAAGGTGTTGCTGACTC  
ATACCAGGCCTGAATCGCCCCATCATCCAGCCAGAAAGTGAGGGAGCCACGGT  
TGATGAGAGCTTTGTTGTAGGTGGACCAGTTGGTGATTTTGAACTTTTGCTTTGC  
CACGGAACGGTCTGCGTTGTGCGGAAGATGCGTGATCTGATCCTTCAACTCAGC  
AAAAGTTCGATTTATTCAACAAAGCCACGTTGTGTCTCAAATCTCTGATGTTAC  
ATTGCACAAGATAAAAATATATCATCATGAACAATAAAACTGTCTGCTTACATAAA  
CAGTAATACAAGGGGTGTTATGAGCCATATTCAACGGGAAACGTCTTGCTCGAG  
GCCGCGATTAAATCCAACATGGATGCTGATTTATATGGGTATAAATGGGCTCG  
CGATAATGTCGGGCAATCAGGTGCGACAATCTATCGATTGTATGGGAAGCCCGA  
TGCGCCAGAGTTGTTTCTGAAACATGGCAAAGGTAGCGTTGCCAATGATGTTAC  
AGATGAGATGGTCAGACTAAACTGGCTGACGGAATTTATGCCTCTTCCGACCAT  
CAAGCATTTTATCCGTA CTCTGATGATGCATGGTTACTCACCCTGCGATCCCC  
GGGAAAACAGCATTCCAGGTATTAGAAGAATATCCTGATTCAGGTGAAAATATTG  
TTGATGCGCTGGCAGTGTTCCCTGCGCCGGTTGCATTCGATTCCTGTTTTGTAATT  
GTCCTTTTAAACAGCGATCGCGTATTTCTGCTCGCTCAGGCGCAATCACGAATGA  
ATAACGGTTTTGGTTGATGCGAGTGATTTTGATGACGAGCGTAATGGCTGGCCTG  
TTGAACAAGTCTGGAAAGAAATGCATAAGCTTTTGCCATTCTCACCGGATTCAGT  
CGTCACTCATGGTGATTTCTCACTTGATAACCTTATTTTTGACGAGGGGAAATTA  
ATAGGTTGTATTGATGTTGGACGAGTCGGAATCGCAGACCGATAACCAGGATCTT  
GCCATCCTATGGAACCTGCCTCGGTGAGTTTTCTCCTTCATTACAGAAACGGCTTT  
TTCAAAAATATGGTATTGATAATCCTGATATGAATAAATTGCAGTTTCATTTGATG  
CTCGATGAGTTTTTCTAATCAGAATTGGTTAATTGGTTGTAACACTGGCAGAGCA  
TTACGCTGACTTGACGGGACGGCGGCTTTGTTGAATAAATCGAACTTTTGCTGA  
GTTGAAGGATCAGATCACGCATCTTCCCGACAACGCAGACCGTTCCGTGGCAA  
GCAAAAGTTCAAATCACCAACTGGTCCACCTACAACAAAGCTCTCATCAACCG  
TGGCTCCCTCACTTTCTGGCTGGATGATGGGGCGATTCAGGCCTGGTATGAGTC  
AGCAACACCTTCTTACGAGGCAGACCTCAGCGCTATTCTGACCTTGCCATCAC  
GACTGTGCTGGTCATTAAACGCGTATTCAGGCTGACCCTGCGCGCTGCGCAGG  
GCTTTATTGATTCCATTTTTACACTGATGAATGTTCCGTTGCGCTGCCCGGATTA  
CAGCCGGATCCGGCCACGATGCGTCCGGCGTAGAGGATCTGAAGATCAGCAGT  
TCAACCTGTTGATAGTACGTAAGCTCTCATGTTTCACGTAAGCTCTCAT  
GTTTAACGTACTAAGCTCTCATGTTTAACGAACTAAACCCTCATGGCTAACGTAC  
TAAGCTCTCATGGCTAACGTACTAAGCTCTCATGTTTCACGTAAGCTCTCAT  
GTTTGAACAATAAAATTAATAAATCAGCAACTTAAATAGCCTCTAAGGTTTTAA  
GTTTTATAAGAAAAAAGAATATATAAGGCTTTTTAAAGCTTTTTAAGGTTTAA  
CGGTTGTGGACAACAAGCCAGGGATGTAACGCACTGAGAAGCCCTTAGAGCCTCTCA  
AAGCAATTTTGAGTGACACAGGAACACTTAACGGCTGACATGGGAATTCCACAT

GTGGAATTCCACATGTGGAATTGTGAGCGGATAACAATTTGTGGAATTCCTGGG  
AGAGCTCGATATCGCATGCGGTACCTCTAGAAGAAGCTTGGGATCCAAAACCGC  
AATTACTTTTGCACCAACCTAATAGAATTCTGGCGTAATAGCGAAGAGGCCCGC  
ACCGATCGCCCTTCCCAACAGTTGCGCAGCCTGAATGGCGAATGGGACGCGCC  
CTGTAGCGGCGCATTAAAGCGCGGCGGGTGTGGTGGTTACGCGCAGCGTGACC  
GCTACACTTGCCAGCGCCCTAGCGCCCGCTCCTTTTCGCTTTCTTCCCTTCCTTT  
CTCGCCACGTTTCGCCGGCTTTCCCGTCAAGCTCTAAATCGGGGGCTCCCTTTA  
GGGTTCCGATTTAGTGCTTTACGGCACCTCGACCCCAAAAACTTGATTAGGGT  
GATGGTTCACGTAGTGGGCCATCGCCCTGATAGACGGTTTTTCGCCCTTTGACG  
TTGGAGTCCACGTTCTTTAATAGTGGACTCTTGTTCAAACTGGAACAACACTCA  
ACCCTATCTCGGTCTATTCTTTTGATTTATAAGGGATTTTGCCGATTTTCGGCCTAT  
TGGTTAAAAAATGAGCTGATTTAACAAAAATTTAACGCGAATTTTAACAAAATATT  
AACGCTTACAATTTAGGTGGCACTTTTCGGGGAAATGTGCGCGGAACCCCTATT  
TGTTTTATTTTTCTAAATACATTCAAATATGTATCCGCTCATGAGACAATAACCCTG  
ATAAATGCTTCAATAATATTGAAAAAGGAAGAGTATGAGTATTCAACATTTCCGT  
GTCGCCCTTATTCCCTTTTTTTCGGGCATTTTGCCTTCCTGTTTTTGCTCACCCAG  
AAACGCTGGTGAAGTAAAAGATGCTGAAGATCAGTTGGGTGCACGAGTGGGTT  
ACATCGAACTGGATCTCAACAGCGGTAAGATCCTTGAGAGTTTTTCGCCCGAAG  
AACGAGCGGAAGAGCGCCAATACGCAAACCGCCTCTCCCCGCGCGTTGGCCG  
ATTCATTAATGCAG

pRC1104

TTCAGTTTAGCCTTAACCGGCGCATGACTTCAAGACTAACTCCTCTAAATCAATT  
ACCAGTGGCTGCTGCCAGTGGTGCTTTTTGCATGTCTTTCCGGGTTGGACTCAAG  
ACGATAGTTACCGGATAAGGCGCAGCGGTCCGACTGAACGGGGGGTTCGTGCA  
TACAGTCCAGCTTGGAGCGAACTGCCTACCCGGAAGTGAAGTGTGAGGCGTGGA  
ATGAGACAAACGCGGCCATAACAGCGGAATGACACCGGTAAACCGAAAGGCAG  
GAACAGGAGAGCGCACGAGGGAGCCGCCAGGGGGAAACGCCTGGTATCTTTAT  
AGTCCTGTCCGGTTTTCGCCACCACTGATTTGAGCGTCAGATTTTCGTGATGCTTG  
TCAGGGGGGCGGAGCCTATGGAAAACGGCTTTGCCGCGGCCCTCTCACTTCC  
CTGTTAAGTATCTTCCCTGGCATCTTCCAGGAAATCTCCGCCCGTTTCGTAAGCC  
ATTTCCGCTCGCCGAGTTCGAACGACCGAGCGTAGCGAGTCAAGTGAAGCGAGGA  
AGCGGAATATATCCTGTATCACATATTCTGCTGACGCACCGGTGCAGCCTTTTTT  
CTCCTGCCACATGAAGCACTTCACTGACACCCTCATCAGTGCCAACATAGTAAG  
CCAGTATACACTCCGCTAGCGCTGATGTCCGGCGGTGCTTTTTGCCGTTACGCAC  
CACCCCGTCAGTAGCTGAACAGGAGGGACAGCTGATAGAAACAGAAGCCACTG  
GAGCACCTCAAAAACACCATCATACACTAAATCAGTAAGTTGGCAGCATCACCC  
GACGCACTTTGCGCCGAATAAATACCTGTGACGGAAGATCACTTCGCAGAATAA  
ATAAATCCTGGTGTCCCTGTTGATACCGGGAAGCCCTGGGCCAACTTTTTGGCGA  
AAATGAGACGTTGATCGGCACGTAAGAGGTTCCAACCTTTACCATAATGAAATAA  
GATCACTACCGGGCGTATTTTTTGGAGTTATCGAGATTTTCAGGAGCTAAGGAAG  
CTAAAATGGAGAAAAAATCACTGGATATACCACCGTTGATATATCCCAATGGCA  
TCGTAAAGAACATTTTTGAGGCATTTTCAGTCAGTTGCTCAATGTACCTATAACCAG



ACCGTTCAGCTGGATATTACGGCCTTTTTAAAGACCGTAAAGAAAAATAAGCACA  
AGTTTTATCCGGCCTTTATTACATTCTTGCCCGCCTGATGAATGCTCATCCGGA  
ATCCGTATGGCAATGAAAGACGGTGAGCTGGTGATATGGGATAGTGTTACCC  
TTGTTACACCGTTTTCCATGAGCAAACCTGAAACGTTTTTCATCGCTCTGGAGTGAA  
TACCACGACGATTTCCGGCAGTTTCTACACATATATTCGCAAGATGTGGCGTGTT  
ACGGTGAAAACCTGGCCTATTTCCCTAAAGGGTTTATTGAGAATATGTTTTTCGT  
CTCAGCgAATCCCTGGGTGAGTTTACCAGTTTTGATTTAAACGTGGCCAATATG  
GACAACTTCTTCGCCCCCGTTTTACCATGGGCAAATATTATACGCAAGGCGAC  
AAGGTGCTGATGCCGCTGGCGATTACAGGTTTCATCATGCCGTCTGTGATGGCTTC  
CATGTCCGCAGAATGCTTAATGAATTACAACAGTACTGCGATGAGTGGCAGGGC  
GGGGCGTAATTTTTTAAAGGCAGTTATTGGTGCCCTTAAACGCCTGGTGCTACG  
CCTGAATAAGTGATAATAAGCGGATGAATGGCAGAAATTCGAAAGCAAATTCGA  
CCCGGTGCTCGGTTACAGGGCAGGGTCGTTAAATAGCCGCTTATGTCTATTGCTG  
GTTTACCGGTTTATTGACTACCGGAAGCAGTGTGACCGTGTGCTTCTCAAATGC  
CTGAGGCCAGTTTGCTCAGGCTCTCCCCGTGGAGGTAATAATTGACGATATGAT  
CATTTATTCTGCCTCCCAGAGCCTGATAAAAACGGTTAGCGCTTCGTTAATACAG  
ATGTAGGTGTTCCACAGGGTAGCCAGCAGCATCCTGCGATGCAGATCCGGAAC  
ATAATGGTGCAGGGCGCTTGTTTCGGCGTGGGTATGGTGGCAGGCCCCCGTGGC  
CGGGGGACTGTTGGGCGCTGCCGGCACCTGTCCTACGAGTTGCATGATAAAGA  
AGACAGTCATAAGTGCGGGCAGGATAGTCATGCCCCGCGCCACCGGAAGGAG  
CTACCGGACAGCGGTGCGGACTGTTGTAACCTCAGAATAAGAAATGAGGCCGCT  
CATGGCGTTGACTCTCAGTCATAGTATCGTGGTATCACCGGTTGGTTCCACTCT  
CTGTTGCGGGCAACTTCAGCAGCACGTAGGGGACTTCCGCGTTTCCAGACTTTA  
CGAAACACGGAAACCGAAGACCATTTCATGTTGTTGCTCAGGTGCGCAGACGTTTT  
GCAGCAGCAGTCGCTTCACGTTTCGCTCGCGTATCGGTGATTCATTCTGCTAACC  
AGTAAGGCAACCCCGCCAGCCTAGCCGGGTCCTCAACGACAGGAGCACGATCA  
TGCGCACCCGTGGCCAGGACCCAACGCTGCCCGAGATGCGCCGCGTGCGGCT  
GCTGGAGATGGCGGACGCGATGGATATGTTCTGCCAAGGGTTGGTTTGCGCAT  
TCACAGTTCTCCGCAAGAATTGATTGGCTCCAATTCTTGAGTGGTGAATCCGTT  
AGCGAGGTGCCGCCGGCTTCCATTCAGGTGCGAGGTGGCCCGGCTCCATGCACC  
GCGACGCAACGCGGGGAGGCAGACAAGGTATAGGGCGGGCGCCTACAATCCAT  
GCCAACCCGTTCCATGTGCTCGCCGAGGCGGCATAAATCGCCGTGACGATCAG  
CGGTCCAGTGATCGAAGTTAGGCTGGTAAGAGCCGCGAGCGATCCTTGAAGCT  
GTCCCTGATGGTTCGTCATCTACCTGCCTGGACAGCATGGCCTGCAACGCGGGC  
ATCCCGATGCCGCCGGAAGCGAGAAGAATCATAATGGGGAAGGCCATCCAGCC  
TCGCGTCGCGAACGCCAGCAAGACGTAGCCCAGCGCGTCGGCCGCCATGCCG  
GCGATAATGGCCTGCTTCTCGCCGAAACGTTTTGGTGGCGGGACCAGTGACGAA  
GGCTTGAGCGAGGGCGTGCAAGATTCCGAATACCGCAAGCGACAGGCCGATCA  
TCGTCCGCTCCAGCGAAAGCGGTCCCTCGCCGAAAATGACCCAGAGCGCTGCC  
GGCACCTGTCCTACGAGTTGCATGATAAAGAAGACAGTCATAAGTGCGGCGAC  
GATAGTCATGCCCCGCGCCACCGGAAGGAGCTGACTGGGTTGAAGGCTCTCA  
AGGGCATCGGTGACGCTCTCCCTTATGCGACTCCTGCATTAGGAAGCAGCCC  
AGTAGTAGGTTGAGGCCGTTGAGCACCGCCGCCGCAAGGAATGGTGCATGCAA  
GGAGATGGCGCCCAACAGTCCCCCGGCCACGGGGCCTGCCACCATACCCACG

CCGAAACAAGCGCTCATGAGCCCGAAGTGGCGAGCCCGATCTTCCCCATCGGT  
GATGTGGCGATATAGGCGCCAGCAACCGCACCTGTGGCGCCGGTGATGCCG  
GCCACGATGCGTCCGGCGTAGAGGATCCACAGGACGGGTGTGGTCCGCATGAT  
CGCGTAGTCGATAGTGGCTCCAAGTAGCGAAGCGAGCAGGACTGGGCGGCGG  
CCAAAGCGGTTCGGACAGTGCTCCGAGAACGGGTGCGCATAGAAATTGCATCAA  
CGCATATAGCGCTAGCAGCACGCCATAGTGACTIONGGCGATGCTGTCCGAATGGA  
CGATATCCCGCAAGAGGCCCGGCAGTACCGGCATAACCAAGCCTATGCCTACA  
GCATCCAGGGTGACGGTGCCGAGGATGACGATGAGCGCATTGTTAGATTTTCATA  
CACGGTGCCTGACTGCGTTAGCAATTTAACTGTGATAAACTACCGCATTAAAGCT  
TATCGATGATAAGCTGTCAAACATGAGAATTACAACCTTATATCGTATGGGGCTGA  
CTTCAGGTGCTACATTTGAAGAGATAAATTGCACTGAAATCTAGAAATATTTTATC  
TGATTAATAAGATGATCTTCTTGAGATCGTTTTGGTCTGCGCGTAATCTCTTGCT  
CTGAAAACGAAAAAACC GCCTTGCAGGGCGGTTTTTCGAAGTTCTCTGAGCTA  
CCAACCTCTTTGAACCGAGGTAACCTGGCTTGGAGGAGCGCAGTCACCAAACTTG  
TCCTTTCAGTTTAGCCTTAACCGGCGCATGACTTCAAGACTAACTCCTCTAAATC  
AATTACCAGTGGCTGCTGCCAGTGGTGTCTTTTGCATGTCTTTCCGGGTTGGACT  
CAAGACGATAGTTACCGGATAAAGGCGCAGCGGTTCGGACTGAACGGGGGGTTCCG  
TGCATACAGTCCAGCTTGGAGCGAACTGCCTACCCGGAACCTGAGTGTGAGGCG  
TGGAATGAGACAAACGCGGCCATAACAGCGGAATGACACCGGTAAACCGAAAG  
GCAGGAACAGGAGAGCGCACGAGGGAGCCGCCAGGGGGAAACGCCTGGTATC  
TTTATAGTCCTGTCGGGTTTTCGCCACCACTGATTTGAGCGTCAGATTTCTGTGATG  
CTTGTGAGGGGGGCGGAGCCTATGGAAAACGGCTTTGCCGCGGCCCTCTCAC  
TTCCCTGTTAAGTATCTTCCTGGCATCTTCCAGGAAATCTCCGCCCCCGTTCTGTA  
GCCATTTCCGCTCGCCGCAGTCGAACGACCGAGCGTAGCGAGTCAGTGAGCGA  
GGAAGCGGAATATATCCTGTATCACATATTCTGCTGACGCACCGGTGCAGCCTT  
TTTTCTCCTGCCACATGAAGCACTTCACTGACACCCTCATCAGTGCCAACATAGT  
AAGCCAGTATACACTCCGCTAGCGCTGATGTCCGGCGGTGCTTTTGCCGTTACG  
CACCACCCCGTCAGTAGCTGAACAGGAGGGACAGCTGATAGAAACAGAAGCCA  
CTGGAGCACCTCAAAAACACCATCATACTAAATCAGTAAGTTGGCAGCATCA  
CCCGACGCACTTTGCGCCGAATAAATACCTGTGACGGAAGATCACTTCGCAGAA  
TAAATAAATCCTGGTGTCCCTGTTGATACCGGGAAGCCCTGGGCCAACTTTTGG  
CGAAAATGAGACGTTGATCGGCACGTAAGAGGTTCCAACCTTTCACCATAATGAA  
ATAAGATCACTACCGGGCGTATTTTTTGGAGTTATCGAGATTTTCAGGAGCTAAGG  
AAGCTAAAATGGAGAAAAAATCACTGGATATACCACCGTTGATATATCCCAATG  
GCATCGTAAAGAACATTTTGGAGGCATTTTCAGTCAGTTGCTCAATGTACCTATAAC  
CAGACCGTTTCAGCTGGATATTACGGCCTTTTTTAAAGACCGTAAAGAAAAATAAG  
CACAAGTTTTATCCGGCCTTTATTCACATTCTTGCCCGCCTGATGAATGCTCATC  
CGGAATTCGTATGGCAATGAAAGACGGTGAGCTGGTGTATATGGGATAGTGTTCC  
ACCCTTGTTACACCGTTTTCCATGAGCAAACCTGAAACGTTTTTCATCGCTCTGGAG  
TGAATACCACGACGATTTCCGGCAGTTTCTACACATATATTCGCAAGATGTGGC  
GTGTTACGGTGAACCTGGCCTATTTCCCTAAAGGGTTTATTGAGAATATGTTT  
TTCGTCTCAGCgAATCCCTGGGTGAGTTTACCAGTTTTGATTTAAACGTGGCCA  
ATATGGACAACCTTCTTCGCCCCCGTTTTTACCATGGGCAAATATTATACGCAAGG  
CGACAAGGTGCTGATGCCGCTGGCGATTACAGGTTTCATCATGCCGCTGTGATG

GCTTCCATGTCGGCAGAATGCTTAATGAATTACAACAGTACTGCGATGAGTGGC  
AGGGCGGGGCGTAATTTTTTTAAGGCAGTTATTGGTGCCCTTAAACGCCTGGTG  
CTACGCCTGAATAAGTGATAATAAGCGGATGAATGGCAGAAATTCGAAAGCAAA  
TTCGACCCGGTCGTCGGTTCAGGGCAGGGTCGTTAAATAGCCGCTTATGTCTAT  
TGCTGGTTTACCGGTTTATTGACTACCGGAAGCAGTGTGACCGTGTGCTTCTCA  
AATGCCTGAGGCCAGTTTGCTCAGGCTCTCCCCGTGGAGGTAATAATTGACGAT  
ATGATCATTATTCTGCCTCCAGAGCCTGATAAAAACGGTTAGCGCTTCGTTAA  
TACAGATGTAGGTGTTCCACAGGGTAGCCAGCAGCATCCTGCGATGCAGATCC  
GGAACATAATGGTGCAGGGCGCTTGTTCGGCGTGGGTATGGTGGCAGGCCCC  
GTGGCCGGGGGACTGTTGGGCGCTGCCGGCACCTGTCCTACGAGTTGCATGAT  
AAAGAAGACAGTCATAAGTGCGGCGACGATAGTCATGCCCCGCGCCCACCGGA  
AGGAGCTACCGGACAGCGGTGCGGACTGTTGTA ACTCAGAATAAGAAATGAGG  
CCGCTCATGGCGTTGACTCTCAGTCATAGTATCGTGGTATCACCGGTTGGTTCC  
ACTCTCTGTTGCGGGCAACTTCAGCAGCACGTAGGGGACTTCCGCGTTTCCAGA  
CTTTACGAAACACGGAAACCGAAGACCATTGTTGTTGCTCAGGTCGCAGAC  
GTTTTGCAGCAGCAGTCGCTTCACGTTTCGCTCGCGTATCGGTGATTCTTCTGC  
TAACCAGTAAGGCAACCCCGCCAGCCTAGCCGGGTCTCAACGACAGGAGCAC  
GATCATGCGCACCCGTGGCCAGGACCCAACGCTGCCCGAGATGCGCCGCGTG  
CGGCTGCTGGAGATGGCGGACGCGATGGATATGTTCTGCCAAGGGTTGGTTTG  
CGCATTACAGTTCTCCGCAAGAATTGATTGGCTCCAATTCTTGGAGTGGTGAA  
TCCGTTAGCGAGGTGCCGCCGGCTTCCATTCAGGTCGAGGTGGCCCCGGCTCCA  
TGCACCGCGACGCAACGCGGGGAGGCAGACAAGGTATAGGGCGGCGCCTACA  
ATCCATGCCAACCCGTTCCATGTGCTCGCCGAGGCGGCATAAATCGCCGTGAC  
GATCAGCGGTCCAGTGATCGAAGTTAGGCTGGTAAGAGCCGCGAGCGATCCTT  
GAAGCTGTCCCTGATGGTCGTCATCTACCTGCCTGGACAGCATGGCCTGCAAC  
GCGGGCATCCCGATGCCGCCGGAAGCGAGAAGAATCATAATGGGGAAGGCCAT  
CCAGCCTCGCGTTCGCGAACGCCAGCAAGACGTAGCCCAGCGCGTCCGGCCGCC  
ATGCCGGCGATAATGGCCTGCTTCTCGCCGAAACGTTTGGTGGCGGGACCAGT  
GACGAAGGCTTGAGCGAGGGCGTGCAAGATTCCGAATACCGCAAGCGACAGGC  
CGATCATCGTCGCGCTCCAGCGAAAGCGGTCTCGCCGAAAATGACCCAGAGC  
GCTGCCGGCACCTGTCTACGAGTTGCATGATAAAGAAGACAGTCATAAGTGCG  
GCGACGATAGTCATGCCCCGCGCCACCGGAAGGAGCTGACTGGGTTGAAGG  
CTCTCAAGGGCATCGGTGACGCTCTCCCTTATGCGACTCCTGCATTAGGAAGC  
AGCCCAGTAGTAGGTTGAGGCCGTTGAGCACCGCCGCCGCAAGGAATGGTGCA  
TGCAAGGAGATGGCGCCCAACAGTCCCCCGGCCACGGGGCCTGCCACCATAC  
CCACGCCGAAACAAGCGCTCATGAGCCCGAAGTGGCGAGCCCGATCTTCCCCA  
TCGGTGATGTCGGCGATATAGGCGCCAGCAACCGCACCTGTGGCGCCGGTGAT  
GCCGGCCACGATGCGTCCGGCGTAGAGGATCCACAGGACGGGTGTGGTCCGCC  
ATGATCGCGTAGTCGATAGTGGCTCCAAGTAGCGAAGCGAGCAGGACTGGGCG  
GCGGCCAAAGCGGTTCGGACAGTGCTCCGAGAACGGGTGCGCATAGAAATTGCA  
TCAACGCATATAGCGCTAGCAGCACGCCATAGTACTGGCGATGCTGTCCGAAT  
GGACGATATCCCGCAAGAGGCCCGGCAGTACCGGCATAACCAAGCCTATGCCT  
ACAGCATCCAGGGTGACGGTGCCGAGGATGACGATGAGCGCATTGTTAGATTT  
CATACACGGTGCTGACTGCGTTAGCAATTTAACTGTGATAAACTACCGCATTA

AGCTTATCGATGATAAGCTGTCAAACATGAGAATTACAACCTTATATCGTATGGGG  
CTGACTTCAGGTGCTACATTTGAAGAGATAAATTGCACTGAAATCTAGAAATATT  
TTATCTGATTAATAAGATGATCTTCTTGAGATCGTTTTGGTCTGCGCGTAATCTCT  
TGCTCTGAAAACGAAAAAACCGCCTTGACAGGGCGGTTTTTCGAAGGTTCTCTGA  
GCTACCAACTCTTTGAACCGAGGTAACCTGGCTTGGAGGAGCGCAGTCACCAAAA  
CTTGTCT

pRC2301

GAATTCCGGATGAGCATTTCATCAGGCGGGCAAGAATGTGAATAAAGGCCGGAT  
AAAACCTTGTGCTTATTTTTCTTACGGTCTTTAAAAGGCCGTAATATCCAGCTGA  
ACGGTCTGGTTATAGGTACATTGAGCAACTGACTGAAATGCCTCAAATGTTCTT  
TACGATGCCATTGGGATATATCAACGGTGGTATATCCAGTGATTTTTTTCTCCAT  
TTAGCTTCCTTAGCTCCTGAAAATCTCGATAACTCAAAAATACGCCCGGTAGT  
GATCTTATTTTATTATGGTGAAAGTTGGAACCTCTTACGTGCCGATCAACGTCTC  
ATTTTCGCCAAAAGTTGGCCCAGGGCTTCCCGGTATCAACAGGGACACCAGGAT  
TTATTTATTCTGCGAAGTGATCTTCCGTCACAGGTATTTATTCGGCGCAAAGTGC  
GTCGGGTGATGCTGCCAACTTACTGATTTAGTGTATGATGGTGTTTTTGAGGTG  
CTCCAGTGGCTTCTGTTTCTATCAGCTGTCCCTCCTGTTCCAGCTACTGACGGGG  
TGGTGCGTAACGGCAAAGCACCGCCGGACATCAGCGCTAGCGGAGTGTATAC  
TGGCTTACTATGTTGGCACTGATGAGGGTGTGAGTGAAGTGCTTCATGTGGCAG  
GAGAAAAAAGGCTGCACCGGTGCGTCAGCAGAATATGTGATACAGGATATATTC  
CGCTTCTCGCTCACTGACTCGCTACGCTCGGTGCTTCGACTGCGGCGAGCGG  
AAATGGCTTACGAACGGGGCGGAGATTTCTGGAAGATGCCAGGAAGATACTTA  
ACAGGGAAGTGAGAGGGCCGCGGCAAAGCCGTTTTTTCCATAGGCTCCGCCCCC  
CTGACAAGCATCACGAAATCTGACGCTCAAATCAGTGGTGGCGAAACCCGACA  
GGACTATAAAGATACCAGGCGTTTTCCCCTGGCGGCTCCCTCGTGCGCTCTCCT  
GTTCTGCTTTTCGGTTTACCGGTGTCATTCCGCTGTTATGGCCGCGTTTGTCT  
CATTCCACGCCTGACACTCAGTTCCGGGTAGGCAGTTCGCTCCAAGCTGGACT  
GTATGCACGAACCCCCGTTTCACTCCGACCGCTGCGCCTTATCCGGTAACTATC  
GTCTTGAGTCCAACCCGAAAGACATGCAAAGCACCACTGGCAGCAGCCACT  
GGTAATTGATTTAGAGGAGTTAGTCTTGAAGTCATGCGCCGGTTAAGGCTAAAC  
TGAAAGGACAAGTTTTGGTGACTGCGCTCCTCCAAGCCAGTTACCTCGGTTCAA  
AGAGTTGGTAGCTCAGAGAACCTTCGAAAAACCGCCCTGCAAGGCGGTTTTTTC  
GTTTTCAGAGCAAGAGATTACGCGCAGACCAAACGATCTCAAGAAGATCATCT  
TATTAATCAGATAAAATATTTCTAGATTTTCACTGCAATTTATCTCTTCAAATGTAG  
CACCTGAAGTCAGCCCCATACGATATAAGTTGTAATTCTCATGTTTGACAGCTTA  
TCATCGATAAGCTTTAATGCGGTAGTTTATCACAGTTAAATTGCTAACGCAGTCA  
GGCACCGTGTATGAAATCTAACAATGCGCTCATCGTCATCCTCGGCACCGTCAC  
CCTGGATGCTGTAGGCATAGGCTTGGTTATGCCGGTACTGCCGGGCTCTTGC  
GGGATTACGAAATCATCCTGTGGAGCTTAGTAGGTTTAGCAAGATGGCAGCGCC  
TAAATGTAGAATGATAAAAGGATTAAGAGATTAATTTCCCTAAAATGATAAAACA  
AGCGTTTTGAAAGCGCTTGTTTTTTTGGTTTGCAGTCAGAGTAGAATAGAAGTAT  
CAAAAAAGCACCGACTCGGTGCCACTTTTTCAAGTTGATAACGGACTAGCCTT

ATTTAACTTGCTATGCTGTTTTGAATGGTTCCAACAAGATTATTTTATAACTTTTA  
TAACAAATAATCAAGGAGAAATTCAAAGAAATTTATCAGCCATAAAACAATACTTA  
ATACTATAGAATGATAACAAAATAA ACTACTTTTTAAAAGAATTTTGTGTTATAATC  
TATTTATTATTAAGTATTGGGTAATATTTTTTTGAAGAGATATTTTGAAAAAGAAAA  
TTAAAGCATATTA AACTAATTTCCGGAGGTCATTA AACTATTATTGAAATCATCAA  
ACTCATTATGGATTTAATTTAACTTTTTATTTTAGGAGGC AAAAATGGATAAGAA  
ATACTCAATAGGCTTAGCTATCGGCACAAATAGCGTCCGGATGGGCGGTGATCAC  
TGATGAATATAAGGTTCCGTCTAAAAGTTCAAGGTTCTGGGAAATACAGACCG  
CCACAGTATCAAAAAAATCTTATAGGGGCTCTTTTATTTGACAGTGGAGAGACA  
GCGGAAGCGACTCGTCTCAAACGGACAGCTCGTAGAAGGTATACACGTCGGAA  
GAATCGTATTTGTTATCTACAGGAGATTTTTTTCAAATGAGATGGCGAAAGTAGAT  
GATAGTTTCTTTCATCGACTTGAAGAGTCTTTTTTTGGTGGAAGAAGACAAGAAGC  
ATGAACGTCATCCTATTTTTGGAAATATAGTAGATGAAGTTGCTTATCATGAGAA  
ATATCCA ACTATCTATCATCTGCGAAAAAATTGGTAGATTCTACTGATAAAGCG  
GATTTGCGCTTAATCTATTTGGCCTTAGCGCATATGATTAAGTTTCGTGGTCATT  
TTTTGATTGAGGGAGATTTAAATCCTGATAATAGTGATGTGGACAAACTATTTAT  
CCAGTTGGTACAAACCTACAATCAATTATTTGAAGAAAACCTATTAACGCAAGT  
GGAGTAGATGCTAAAGCGATTCTTTCTGCACGATTGAGTAAATCAAGACGATTA  
GAAAATCTCATTGCTCAGCTCCCCGGTGAGAAGAAAAATGGCTTATTTGGGAAT  
CTCATTGCTTTGTCATTGGGTTTGACCCCTAATTTTAAATCAAATTTTGATTTGGC  
AGAAGATGCTAAATTACAGCTTTCAAAGATACTTACGATGATGATTTAGATAATT  
TATTGGCGCAAATTGGAGATCAATATGCTGATTTGTTTTTTGGCAGCTAAGAATTT  
ATCAGATGCTATTTTACTTT CAGATATCCTAAGAGTAAATACTGAAATAACTAAGG  
CTCCCCTATCAGCTTCAATGATTAACGCTACGATGAACATCATCAAGACTTGAC  
TCTTTTAAAAGCTTTAGTTTCGACAACA ACTTCCAGAAAAGTATAAAGAAATCTTTT  
TTGATCAATCAAAAAACGGATATGCAGGTTATATTGATGGGGGAGCTAGCCAAG  
AGAATTTTATAAATTTATCAAACCAATTTTAGAAAAAATGGATGGTACTGAGGAA  
TTATTGGTGAAACTAAATCGTGAAGATTTGCTGCGCAAGCAACGGACCTTTGAC  
AACGGCTCTATTCCC CATCAAATTC ACTTGGGTGAGCTGCATGCTATTTTTGAGAA  
GACAAGAAGACTTTTATCCATTTTTAAAAGACAATCGTGAGAAGATTGAAAAAAT  
CTTGACTTTTTCGAATTCCTTATTATGTTGGTCCATTGGCGCGTGGCAATAGTCGT  
TTTGCATGGATGACTCGGAAGTCTGAAGAAACAATTACCCCATGGAATTTTGAAG  
AAGTTGTCGATAAAGGTGCTTCAGCTCAATCATTTATTGAACGCATGACAAACTT  
TGATAAAAATCTTCAAATGAAAAAGTACTACCAAACATAGTTTGCTTTATGAGT  
ATTTTACGGTTTATAACGAATTGACAAAGGTCAAATATGTTACTGAAGGAATGCG  
AAAACCAGCATTTCCTTTCAGGTGAACAGAAGAAAGCCATTGTTGATTTACTCTTC  
AAAACAAATCGAAAAGTAACCGTTAAGCAATTAAGAAGATTATTTCAAAAAAAT  
AGAATGTTTTGATAGTGTGAAATTT CAGGAGTTGAAGATAGATTTAATGCTTCAT  
TAGGTACCTACCATGATTTGCTAAA AATTATTAAGATAAAGATTTTTTTGGATAAT  
GAAGAAAATGAAGATATCTTAGAGGATATTGTTTTAACATTGACCTTATTTGAAGA  
TAGGGAGATGATTGAGGAAAGACTTAAAACATATGCTCACCTCTTTGATGATAAG  
GTGATGAAACAGCTTAAACGTCGCCGTTATACTGGTTGGGGACGTTTGTCTCGA  
AAATTGATTAATGGTATTAGGGATAAGCAATCTGGCAAACAATATTAGATTTTTT  
GAAATCAGATGGTTTTGCCAATCGCAATTTTATGCAGCTGATCCATGATGATAGT

TTGACATTTAAAGAAGACATTCAAAAAGCACAAGTGTCTGGACAAGGCGATAGTT  
TACATGAACATATTGCAAATTTAGCTGGTAGCCCTGCTATTA AAAAAGGTATTTTA  
CAGACTGTAAAAGTTGTTGATGAATTGGTCAAAGTAATGGGGCGGCATAAGCCA  
GAAAATATCGTTATTGAAATGGCACGTGAAAATCAGACAACCTCAAAGGGCCAG  
AAAAATTCGCGAGAGCGTATGAAACGAATCGAAGAAGGTATCAAAGAATTAGGA  
AGTCAGATTCTTAAAGAGCATCCTGTTGAAAATACTCAATTGCAAATGAAAAGC  
TCTATCTCTATTATCTCCAAAATGGAAGAGACATGTATGTGGACCAAGAATTAGA  
TATTAATCGTTTAAAGTGATTATGATGTCGATGCCATTGTTCCACAAAGTTTCCTTA  
AAGACGATTCAATAGACAATAAGGTCTTAACGCGTTCTGATAAAAATCGTGGTAA  
ATCGGATAACGTTCCAAGTGAAGAAGTAGTCAAAAAGATGAAAACCTATTGGAG  
ACAACTTCTAAACGCCAAGTTAATCACTCAACGTAAGTTTGATAATTTAACGAAA  
GCTGAACGTGGAGGTTTGAGTGAACCTTGATAAAGCTGGTTTTATCAAACGCCAA  
TTGGTTGAAACTCGCCAAATCACTAAGCATGTGGCACA AATTTTGGATAGTCGCA  
TGAATACTAAATACGATGAAAATGATAAACTTATTTCGAGAGGTTAAAGTGATTAC  
CTTAAAATCTAAATTAGTTTCTGACTTCCGAAAAGATTTCCAATTCTATAAAGTAC  
GTGAGATTAACAATTACCATCATGCCCATGATGCGTATCTAAATGCCGTCGTTGG  
AACTGCTTTGATTAAGAAATATCCAAAACCTTGAATCGGAGTTTGTCTATGGTGAT  
TATAAAGTTTATGATGTTGTA AATGATTGCTAAGTCTGAGCAAGAAATAGGCA  
AAGCAACCGCAA AATATTTCTTTTACTCTAATATCATGAACTTCTTCAAACAGAA  
ATTACACTTGCAAATGGAGAGATTTCGCAAACGCCCTCTAATCGAAACTAATGGG  
GAAACTGGAGAAATTGTCTGGGATAAAGGGCGAGATTTTGCCACAGTGCGCAA  
GTATTGTCCATGCCCAAGTCAATATTGTCAAGAAAACAGAAGTACAGACAGGC  
GGATTCTCCAAGGAGTCAATTTTACCAAAAAGAAATTCGGACAAGCTTATTGCTC  
GTAAAAAAGACTGGGATCCAAAAAATATGGTGGTTTTGATAGTCCAACGGTAG  
CTTATTCAGTCCTAGTGGTTGCTAAGGTGGAAAAGGGAAATCGAAGAAGTTAA  
AATCCGTTAAAGAGTTACTAGGGATCACAATTATGGAAAGAAGTTCCTTTGAAAA  
AAATCCGATTGACTTTTTAGAAAGCTAAAGGATATAAGGAAGTTAAAAAAGACTTA  
ATCATTAAACTACCTAAATATAGTCTTTTTGAGTTAGAAAACGGTTCGTAAACGGA  
TGCTGGCTAGTGCCGGAGAATTACAAAAGGAAATGAGCTGGCTCTGCCAAGC  
AAATATGTGAATTTTTTATATTTAGCTAGTCATTATGAAAAGTTGAAGGGTAGTCC  
AGAAGATAACGAACAAAAACAATTGTTTGTGGAGCAGCATAAGCATTATTTAGAT  
GAGATTATTGAGCAAATCAGTGAATTTTCTAAGCGTGTTATTTTAGCAGATGCCA  
ATTTAGATAAAGTTCTTAGTGCATATAACAAACATAGAGACAAACCAATACGTGA  
ACAAGCAGAAAATATTATTCATTTATTTACGTTGACGAATCTTGGAGCTCCCGCT  
GCTTTTAAATATTTTGATACAACAATTGATCGTAAACGATATACGTCTACAAAAGA  
AGTTTTAGATGCCACTCTTATCCATCAATCCATCACTGGTCTTTATGAAACACGC  
ATTGATTTGAGTCAGCTAGGAGGTGACTGAAGTATATTTTAGATGAAGATTATTT  
CTTAATAACTAAAAATATGGTATAATACTCTTAATAAATGCAGTAATACAGGGGCT  
TTCAAGACTGAAGTCTAGCTGAGACAAATAGTGCGATTACGAAATTTTTTAGAC  
AAAAATAGTCTACGAGGTTTTAGAGCTATGCTGTTTTGAATGGTCCCAAACCTGA  
GACCAGTCTCGGAAGCTCAAAGGTCTCGTTTTAGAGCTATGCTGTTTTGAATGG  
TCCCAAACCTCAGCACACTGAGACTTGTTGAGTTCCATGTTTTAGAGCTATGCT  
GTTTTGAATGGACTCCATTCAACATTGCCGATGATAACTTGAGAAAGAGGGTTAA  
TACCAGCAGTCGGATACCTTCTATTCTTTCTGTTAAAGCGTTTTTCATGTTATAAT

AGGCAAAGAAGAGTAGTGTGATCGTCCATTCCGACAGCATCGCCAGTCACTAT  
GGCGTGCTGCTAGCGCTATATGCGTTGATGCAATTTCTATGCGCACCCGTTCTC  
GGAGCACTGTCCGACCGCTTTGGCCGCCGCCAGTCCTGCTCGCTTCGCTACT  
TGGAGCCACTATCGACTACGCGATCATGGCGACCACACCCGTCCTGTGGATCC  
TCTACGCCGGACGCATCGTGGCCGGCATCACCGGCGCCACAGGTGCGGTTGCT  
GGCGCCTATATCGCCGACATCACCGATGGGGAAGATCGGGCTCGCCACTTCGG  
GCTCATGAGCGCTTGTTCGGCGTGGGTATGGTGGCAGGCCCCCGTGGCCGGG  
GGACTGTTGGGCGCCATCTCCTTGCATGCACCATTCTTGCGGCGGCGGTGCT  
CAACGGCCTCAACCTACTACTGGGCTGCTTCCTAATGCAGGAGTCGCATAAGGG  
AGAGCGTCGACCGATGCCCTTGAGAGCCTTCAACCCAGTCAGTCTCTTCCGGT  
GGGCGCGGGGCATGACTATCGTCGCCGCACTTATGACTGTCTTCTTTATCATGC  
AACTCGTAGGACAGGTGCCGGCAGCGCTCTGGGTCAATTTTCGGCGAGGACCGC  
TTTCGCTGGAGCGCGACGATGATCGGCCTGTCGCTTGCGGTATTCGGAATCTTG  
CACGCCCTCGCTCAAGCCTTCGTCACTGGTCCC GCCACCAAACGTTTCGGCGA  
GAAGCAGGCCATTATCGCCGGCATGGCGGCCGACGCGCTGGGCTACGTCTTGC  
TGGCGTTCGCGACGCGAGGCTGGATGGCCTTCCCCATTATGATTCTTCTCGCTT  
CCGGCGGCATCGGGATGCCCGCGTTGCAGGCCATGCTGTCCAGGCAGGTAGA  
TGACGACCATCAGGGACAGCTTCAAGGATCGCTCGCGGCTCTTACCAGCCTAA  
CTTCGATCATTGGACCGCTGATCGTCACGGCGATTTATGCCGCCTCGGCGAGC  
ACATGGAACGGGTTGGCATGGATTGTAGGCGCCGCCCTATACCTTGTCTGCCTC  
CCCGCGTTGCGTCGCGGTGCATGGAGCCGGGCCACCTCGACCTGAATGGAAG  
CCGGCGGCACCTCGCTAACGGATTCACCACTCCAAGAATTGGAGCCAATCAATT  
CTTGCGGAGAACTGTGAATGCGCAAACCAACCCTTGGCAGAACATATCCATCGC  
GTCCGCCATCTCCAGCAGCCGCACGCGGGCGCATCTCGGGCAGCGTTGGGTCT  
GGCCACGGGTGCGCATGATCGTGCTCCTGTGCTTGGAGACCCGGCTAGGCTGG  
CGGGGTTGCCTTACTGGTTAGCAGAATGAATCACCGATACGCGAGCGAACGTG  
AAGCGACTGCTGCTGCAAAACGTCTGCGACCTGAGCAACAACATGAATGGTCTT  
CGGTTTCCGTGTTTCGTAAAGTCTGGAAACGCGGAAGTCCCCTACGTGCTGCTG  
AAGTTGCCCGCAACAGAGAGTGGAACCAACCGGTGATACCACGATACTATGACT  
GAGAGTCAACGCCATGAGCGGCCTCATTCTTATTCTGAGTTACAACAGTCCGC  
ACCGCTGTCCGGTAGCTCCTTCCGGTGGGCGCGGGGCATGACTATCGTCGCCG  
CACTTATGACTGTCTTCTTTATCATGCAACTCGTAGGACAGGTGCCGGCAGCGC  
CCAACAGTCCCCCGGCCACGGGGCCTGCCACCATACCACGCCGAAACAAGC  
GCCCTGCACCATTATGTTCCGGATCTGCATCGCAGGATGCTGCTGGCTACCCTG  
TGGAACACCTACATCTGTATTAACGAAGCGCTAACCGTTTTTATCAGGCTCTGG  
GAGGCAGAATAAATGATCATATCGTCAATTATTACCTCCACGGGGAGAGCCTGA  
GCAAACCTGGCCTCAGGCATTTGAGAAGCACACGGTCACACTGCTTCCGGTAGTC  
AATAAACCGGTAAACCAGCAATAGACATAAGCGGCTATTTAACGACCCTGCCCT  
GAACCGACGACCGGGTTCGAATTTGCTTTTCGAATTTCTGCCATTCATCCGCTTATT  
ATCACTTATTCAGGCGTAGCACCAGGCGTTTAAGGGCACCAATAACTGCCTTAA  
AAAATTACGCCCCGCCCTGCCACTCATCGCAGTACTGTTGTAATTCATTAAGCA  
TTCTGCCGACATGGAAGCCATCACAGACGGCATGATGAACCTGAATCGCCAGC  
GGCATCAGCACCTTGTGCGCTTGCGTATAATATTTGCCCATGGTGAAAACGGGG  
GCGAAGAAGTTGTCCATATTGGCCACGTTTAAATCAAACCTGGTGAAACTCACC

CAGGGATTGGCTGAGACGAAAAACATATTCTCAATAAACCCCTTTAGGGAAATAG  
GCCAGGTTTTACCGTAACACGCCACATCTTGCGAATATATGTGTAGAACTGC  
CGGAAATCGTCGTGGTATTCCTCCAGAGCGATGAAAACGTTTCAGTTTGCTCA  
TGGAACCGGTGTAACAAGGGTGAACACTATCCCATATCACCAGCTCACCGTCT  
TTCATTGCCATACG

pRC2302

GAATTCCGGATGAGCATTTCATCAGGCGGGCAAGAATGTGAATAAAGGCCGGAT  
AAAACCTTGCTTATTTTTCTTTACGGTCTTTAAAAAGGCCGTAATATCCAGCTGA  
ACGGTCTGGTTATAGGTACATTGAGCAACTGACTGAAATGCCTCAAATGTTCTT  
TACGATGCCATTGGGATATATCAACGGTGGTATATCCAGTGATTTTTTTCTCCAT  
TTAGCTTCCTTAGCTCCTGAAAATCTCGATAACTCAAAAATACGCCCGGTAGT  
GATCTTATTTTATTATGGTGAAAGTTGGAACCTCTTACGTGCCGATCAACGTCTC  
ATTTTCGCCAAAAGTTGGCCCAGGGCTTCCCGGTATCAACAGGGACACCAGGAT  
TTATTTATTCTGCGAAGTGATCTTCCGTCACAGGTATTTATTCGGCGCAAAGTGC  
GTCGGGTGATGCTGCCAACTTACTGATTTAGTGTATGATGGTGTTTTTGAGGTG  
CTCCAGTGGCTTCTGTTTTCTATCAGCTGTCCCTCCTGTTTCAGCTACTGACGGGG  
TGGTGCGTAACGGCAAAGCACCGCCGGACATCAGCGCTAGCGGAGTGTATAC  
TGGCTTACTATGTTGGCACTGATGAGGGTGTGAGTGAAGTGCTTCATGTGGCAG  
GAGAAAAAAGGCTGCACCGGTGCGTCAGCAGAATATGTGATACAGGATATATTC  
CGCTTCCTCGCTCACTGACTCGCTACGCTCGGTGTTTCGACTGCGGCGAGCGG  
AAATGGCTTACGAACGGGGCGGAGATTTCTGGAAGATGCCAGGAAGATACTTA  
ACAGGGAAGTGAGAGGGCCGCGCAAAGCCGTTTTTCCATAGGCTCCGCCCCC  
CTGACAAGCATCACGAAATCTGACGCTCAAATCAGTGGTGGCGAAACCCGACA  
GGACTATAAAGATACCAGGCGTTTTCCCCTGGCGGCTCCCTCGTGCGCTCTCCT  
GTTCTGCTTTTCGGTTTACCGGTGTCATTCCGCTGTTATGGCCGCGTTTGTCT  
CATTCCACGCCTGACACTCAGTTCCGGGTAGGCAGTTCGCTCCAAGCTGGACT  
GTATGCACGAACCCCCGTTTCAGTCCGACCGCTGCGCCTTATCCGGTAACTATC  
GTCTTGAGTCCAACCCGGAAGACATGCAAAGCACCACTGGCAGCAGCCACT  
GGTAATTGATTTAGAGGAGTTAGTCTTGAAGTCATGCGCCGGTTAAGGCTAAC  
TGAAAGGACAAGTTTTGGTGACTGCGCTCCTCCAAGCCAGTTACCTCGGTTCAA  
AGAGTTGGTAGCTCAGAGAACCCTTCGAAAACCGCCCTGCAAGGCGGTTTTTTC  
GTTTTCAGAGCAAGAGATTACGCGCAGACCAAACGATCTCAAGAAGATCATCT  
TATTAATCAGATAAAATATTTCTAGATTTTCAGTGCAATTTATCTCTTCAAATGTAG  
CACCTGAAGTCAGCCCCATACGATATAAGTTGTAATTCTCATGTTTGACAGCTTA  
TCATCGATAAGCTTTAATGCGGTAGTTTATCACAGTTAAATTGCTAACGCAGTCA  
GGCACCGTGTATGAAATCTAACAATGCGCTCATCGTCATCCTCGGCACCGTAC  
CCTGGATGCTGTAGGCATAGGCTTGGTTATGCCGGTACTGCCGGGCTCTTGC  
GGGATTACGAAATCATCCTGTGGAGCTTAGTAGGTTTAGCAAGATGGCAGCGCC  
TAAATGTAGAATGATAAAAGGATTAAGAGATTAATTTCCCTAAAAATGATAAAACA  
AGCGTTTTGAAAGCGCTTGTTTTTTTGGTTTGCAGTCAGAGTAGAATAGAAGTAT  
CAAAAAAAGCACCGACTCGGTGCCACTTTTTCAAGTTGATAACGGACTAGCCTT  
ATTTAACTTGCTATGCTGTTTTGAATGGTTCCAACAAGATTATTTATAACTTTTA



TAACAAATAATCAAGGAGAAATTCAAAGAAATTTATCAGCCATAAAACAATACTTA  
ATACTATAGAATGATAACAAAATAAACTACTTTTTAAAAGAATTTTGTGTTATAATC  
TATTTATTATTAAGTATTGGGTAATATTTTTGAAGAGATATTTGAAAAAGAAAA  
TTAAAGCATATTAATACTAATTTTCGGAGGTCATTAATACTATTATTGAAATCATCAA  
ACTCATGCATCATATGGAAATGATGCTCGATAAGAAACAGATTTCGTGCGATCTTT  
CTCTTTGAGTTTAAAATGGGTTCGCAAAGCGGCGGAGACGACGCGTAATATTAAC  
AACGCGTTCGGTCCTGGCACCGCGAACGAGCGTACCGTGCAATGGTGGTTCAA  
AAAGTTTCGCAAAGGCGACGAATCTCTGGAGGACGAAGAGCGTTCTGGCCGCC  
CGTCCGAGGTTGACAACGACCAGCTGCGTGCAATCATCGAAGCTGATCCGCTG  
ACTACCACCCGCGAAGTTGCTGAAGAACTGAATGTGGATCACTCTACTGTGGTT  
CGCCACCTGAAACAGATCGGTAAAGTAAAAAACTGGACAAATGGGTTCCTCAT  
GAACTGTCTGAAAACCAGAAAAACCGTCGTTTTCGAAGTTAGCTCCTCTCTGATTC  
TGCGTAACAACAACGAACCGTTCCTGGATCGTATCGTAACCTGTGATGAGAAAT  
GGATTCTGTATGATAACCGTCGCCGCTCTGCTCAGTGGCTGGATCGCGAAGAA  
GCTCCAAAACACTTCCCGAAACCGAATCTGCACCAGAAGAAAGTCATGGTAACC  
GTATGGTGGTCTGCCGCAGGTGTTATCCAATTCCTTCCTGAACCCGGGCGAA  
ACTATCACCAGCGAAAAATACTGCCAGCAGATTGACGAAATGCACCGTAAACTG  
CAGCGTCTGCAGCCAGCACTGGTGAATCGTAAAGGTCCGATCCTGCTGCATGAT  
AACGCCCGTCCGCACGTTGCCCAACCGACCCTGCAGAACTGAACGAACTGGG  
CTATGAAGTTCTGCCACACCCGCGTACTCCCCGGATCTGTCCCCGACTGACTA  
CCATTTCTTCAAGCATCTGGACAACCTCCTGCAGGGTAAACGTTTTTACAACCAA  
CAGGACGCAGAAAACGCTTTCCAGGAGTTCGTTCGAAAGCCGTTCCACTGACTTC  
TACGCGACCGGTATCAACAAGCTGATCAGCCGTTGGCAGAAATGCGTGGACTG  
TAACGGCAGCTACTTCGATtctagaGGAGGTGGCTCAGAAGGTGGCGGATCTGAA  
GGTGGCTCTGGAactagtATGAGCGATAAAATTATTCACCTGACTGACGACAGTTT  
TGACACGGATGTACTCAAAGCGGACGGGGCGATCCTCGTCGATTTCTGGGCAG  
AGTGGTGCGGTCCGTGCAAATGATCGCCCCGATTCTGGATGAAATCGCTGAC  
GAATATCAGGGCAAACCTGACCGTTGCAAACCTGAACATCGATCAAACCCCTGGC  
ACTGCGCCGAAATATGGCATCCGTGGTATCCCGACTCTGCTGCTGTTCAAAAAC  
GGTGAAGTGGCGGCAACCAAAGTGGGTGCACTGTCTAAAGGTGAGTTGAAAGA  
GTTCTCGACGCTAACCTGGCCGGTTCTGGTTCTGGCCATATGCACCATCATCA  
TCATCATTCTTCTGGTCTGGTGCCACGCGGTTCTGGTATGAAAGAAACCGCTGC  
TGCTAAATTCGAACGCCAGCACATGGACAGCCCAGATCTGGGTACCGACGACG  
ACGACAAGGCCATGGCTGATATCCTCGAGATGGATAAGAAATACTCAATAGGCT  
TAGCTATCGGCACAAATAGCGTCGGATGGGCGGTGATCACTGATGAATATAAGG  
TTCCGTCTAAAAGTTCAAGGTTCTGGGAAATACAGACCGCCACAGTATCAAAA  
AAAATCTTATAGGGGCTCTTTATTTGACAGTGGAGAGACAGCGGAAGCGACTC  
GTCTCAAACGGACAGCTCGTAGAAGGTATACACGTCCGGAAGAATCGTATTTGTT  
ATCTACAGGAGATTTTTTCAAATGAGATGGCGAAAGTAGATGATAGTTTCTTTCA  
TCGACTTGAAGAGTCTTTTTTGGTGGAAAGAAGACAAGAAGCATGAACGTCATCC  
TATTTTTGGAAATATAGTAGATGAAGTTGCTTATCATGAGAAATATCCAATATCT  
ATCATCTGCGAAAAAATTGGTAGATTCTACTGATAAAGCGGATTTGCGCTTAAT  
CTATTTGGCCTTAGCGCATATGATTAAGTTTCGTGGTCATTTTTTATTGAGGGA  
GATTTAAATCCTGATAATAGTGATGTGGACAACTATTTATCCAGTTGGTACAAA

CCTACAATCAATTATTTGAAGAAAACCCTATTAACGCAAGTGGAGTAGATGCTAA  
AGCGATTCTTTCTGCACGATTGAGTAAATCAAGACGATTAGAAAATCTCATTGCT  
CAGCTCCCCGGTGAGAAGAAAAATGGCTTATTTGGGAATCTCATTGCTTTGTCAT  
TGGGTTTGACCCCTAATTTTAAATCAAATTTTGATTTGGCAGAAGATGCTAAATTA  
CAGCTTTCAAAGATACTTACGATGATGATTTAGATAATTTATTGGCGCAAATTG  
GAGATCAATATGCTGATTTGTTTTGGCAGCTAAGAATTTATCAGATGCTATTTTA  
CTTTCAGATATCCTAAGAGTAAATACTGAAATAACTAAGGCTCCCCTATCAGCTT  
CAATGATTAACGCTACGATGAACATCATCAAGACTTGACTCTTTTAAAAGCTTT  
AGTTCGACAACAACCTCCAGAAAAGTATAAAGAAATCTTTTTTGATCAATCAAAAA  
ACGGATATGCAGGTTATATTGATGGGGGAGCTAGCCAAGAAGAATTTTATAAATT  
TATCAAACCAATTTTAGAAAAAATGGATGGTACTGAGGAATTATTGGTGAAACTA  
AATCGTGAAGATTTGCTGCGCAAGCAACGGACCTTTGACAACGGCTCTATTCCC  
CATCAAATTCACTTGGGTGAGCTGCATGCTATTTTGAGAAGACAAGAAGACTTTT  
ATCCATTTTTAAAAGACAATCGTGAGAAGATTGAAAAAATCTTGACTTTTCGAATT  
CCTTATTATGTTGGTCCATTGGCGCGTGGCAATAGTCGTTTTGCATGGATGACT  
CGGAAGTCTGAAGAAACAATTACCCCATGGAATTTTGAAGAAGTTGTCGATAAA  
GGTGCTTCAGCTCAATCATTTATTGAACGCATGACAACTTTGATAAAAATCTTC  
CAAATGAAAAAGTACTACCAAACATAGTTTGCTTTATGAGTATTTTACGGTTTAT  
AACGAATTGACAAAGGTCAAATATGTTACTGAAGGAATGCGAAAACCAGCATTTC  
TTTCAGGTGAACAGAAGAAAGCCATTGTTGATTTACTCTTCAAACAAATCGAAA  
AGTAACCGTTAAGCAATTAAGAAGATTATTTCAAAAAAATAGAATGTTTTGATA  
GTGTTGAAATTCAGGAGTTGAAGATAGATTTAATGCTTCATTAGGTACCTACCA  
TGATTTGCTAAAAATTATTAAGATAAAGATTTTTTGGATAATGAAGAAAATGAAG  
ATATCTTAGAGGATATTGTTTTAACATTGACCTTATTTGAAGATAGGGAGATGATT  
GAGGAAAGACTTAAAACATATGCTCACCTCTTTGATGATAAGGTGATGAAACAG  
CTTAAACGTCGCCGTTATACTGGTTGGGGACGTTTGTCTCGAAAATTGATTAATG  
GTATTAGGGATAAGCAATCTGGCAAACAATATTAGATTTTTTGAATCAGATGG  
TTTTGCCAATCGCAATTTTATGCAGCTGATCCATGATGATAGTTTGACATTTAAA  
GAAGACATTCAAAAAGCACAAGTGTCTGGACAAGGCGATAGTTTACATGAACAT  
ATTGCAAATTTAGCTGGTAGCCCTGCTATTA AAAAAGGTATTTTACAGACTGTAA  
AAGTTGTTGATGAATTGGTCAAAGTAATGGGGCGGCATAAGCCAGAAAATATCG  
TTATTGAAATGGCACGTGAAAATCAGACAACCTCAAAGGGCCAGAAAATTCGC  
GAGAGCGTATGAAACGAATCGAAGAAGGTATCAAAGAATTAGGAAGTCAGATTC  
TAAAGAGCATCCTGTTGAAAATACTCAATTGCAAATGAAAAGCTCTATCTCTAT  
TATCTCCAAAATGGAAGAGACATGTATGTGGACCAAGAATTAGATATTAATCGTT  
TAAGTGATTATGATGTCGATGCCATTGTTCCACAAAGTTTCCTTAAAGACGATTC  
AATAGACAATAAGGTCTTAACGCGTTCTGATAAAAATCGTGGTAAATCGGATAAC  
GTTCCAAGTGAAGAAGTAGTCAAAAAGATGAAAAACTATTGGAGACAACCTTCTAA  
ACGCCAAGTTAATCACTCAACGTAAGTTTGATAATTTAACGAAAGCTGAACGTGG  
AGGTTTGAGTGAACCTTGATAAAGCTGGTTTTATCAAACGCCAATTGGTTGAACT  
CGCCAAATCACTAAGCATGTGGCACAAATTTTGGATAGTCGCATGAATACTAAAT  
ACGATGAAAATGATAAACTTATTTCGAGAGGTTAAAGTGATTACCTTAAAATCTAA  
ATTAGTTTCTGACTTCCGAAAAGATTTCCAATTCTATAAAGTACGTGAGATTAACA  
ATTACCATCATGCCCATGATGCGTATCTAAATGCCGTCGTTGGAAGTCTTTGAT

TAAGAAATATCCAAAACCTTGAATCGGAGTTTGTCTATGGTGATTATAAAGTTTATG  
ATGTTTCGTAAAATGATTGCTAAGTCTGAGCAAGAAATAGGCAAAGCAACCGCAA  
AATATTTCTTTTACTCTAATATCATGAACCTTCTTCAAACAGAAATTACACTTGCA  
AATGGAGAGATTTCGCAAACGCCCTCTAATCGAAACTAATGGGGAAACTGGAGAA  
ATTGTCTGGGATAAAGGGCGAGATTTTGCCACAGTGCGCAAAGTATTGTCCATG  
CCCCAAGTCAATATTGTCAAGAAAACAGAAGTACAGACAGGCGGATTCTCCAAG  
GAGTCAATTTTACCAAAAAGAAATTCGGACAAGCTTATTGCTCGTAAAAAAGACT  
GGGATCCAAAAAATATGGTGGTTTTGATAGTCCAACGGTAGCTTATTCAGTCCT  
AGTGGTTGCTAAGGTGGAAAAAGGGAAATCGAAGAAGTTAAAATCCGTTAAAGA  
GTTACTAGGGATCACAATTATGGAAAGAAGTTCCTTTGAAAAAATCCGATTGAC  
TTTTTAGAAGCTAAAGGATATAAGGAAGTAAAAAAGACTTAATCATTAACTACC  
TAAATATAGTCTTTTTGAGTTAGAAAACGGTCGTAAACGGATGCTGGCTAGTGCC  
GGAGAATTACAAAAGGAAATGAGCTGGCTCTGCCAAGCAAATATGTGAATTTTT  
TATATTTAGCTAGTCATTATGAAAAGTTGAAGGGTAGTCCAGAAGATAACGAACA  
AAAACAATTGTTTGTGGAGCAGCATAAGCATTATTTAGATGAGATTATTGAGCAA  
ATCAGTGAATTTTCTAAGCGTGTTATTTTAGCAGATGCCAATTTAGATAAAGTTCT  
TAGTGCATATAACAAACATAGAGACAAACCAATACGTGAACAAGCAGAAAATATT  
ATTCATTTATTTACGTTGACGAATCTTGAGCTCCCGCTGCTTTTAAATATTTTGA  
TACAACAATTGATCGTAAACGATATACGTCTACAAAAGAAGTTTTAGATGCCACT  
CTTATCCATCAATCCATCACTGGTCTTTATGAAACACGCATTGATTTGAGTCAGC  
TAGGAGGTGACTGAAGTATATTTTAGATGAAGATTATTTCTTAATAACTAAAAATA  
TGGTATAATACTCTTAATAAATGCAGTAATACAGGGGCTTTTCAAGACTGAAGTC  
TAGCTGAGACAAATAGTGCGATTACGAAATTTTTTAGACAAAATAGTCTACGAG  
GTTTTAGAGCTATGCTGTTTTGAATGGTCCCAAACTGAGACCAGTCTCGGAAG  
CTCAAAGGTCTCGTTTTAGAGCTATGCTGTTTTGAATGGTCCCAAACTTCAGCA  
CACTGAGACTTGTTGAGTTCCATGTTTTAGAGCTATGCTGTTTTGAATGGACTCC  
ATCAACATTGCCGATGATAACTTGAGAAAGAGGGTTAATACCAGCAGTCGGAT  
ACCTTCCTATTCTTTCTGTTAAAGCGTTTTTCATGTTATAATAGGCAAAGAAGAGT  
AGTGTGATCGTCCATTCCGACAGCATCGCCAGTCACTATGGCGTGCTGCTAGCG  
CTATATGCGTTGATGCAATTTCTATGCGCACCCGTTCTCGGAGCACTGTCCGAC  
CGCTTTGGCCGCCGCCAGTCCTGCTCGCTTCGCTACTTGGAGCCACTATCGA  
CTACGCGATCATGGCGACCACCCCGTCCTGTGGATCCTCTACGCCGGACGCA  
TCGTGGCCGGCATCACCGGCCACAGGTGCGGTTGCTGGCGCCTATATCGCC  
GACATCACCGATGGGGAAGATCGGGCTCGCCACTTCGGGCTCATGAGCGCTTG  
TTTCGGCGTGGGTATGGTGGCAGGCCCGTGGCCGGGGGACTGTTGGGCGCC  
ATCTCCTTGCATGCACCATTCTTTCGCGCGGCGGTGCTCAACGGCCTCAACCTA  
CTACTGGGCTGCTTCTAATGCAGGAGTCGCATAAGGGAGAGCGTCGACCGAT  
GCCCTTGAGAGCCTTCAACCCAGTCAGCTCCTTCCGGTGGGCGCGGGGCATGA  
CTATCGTCGCCGCACTTATGACTGTCTTCTTTATCATGCAACTCGTAGGACAGGT  
GCCGGCAGCGCTCTGGGTCATTTTCGGCGAGGACCGCTTTCGCTGGAGCGCGA  
CGATGATCGGCCTGTCGCTTTCGGTATTCGGAATCTTGCACGCCCTCGCTCAAG  
CCTTCGTCACTGGTCCCGCCACCAAACGTTTCGGCGAGAAGCAGGCCATTATC  
GCCGGCATGGCGGCCGACGCGCTGGGCTACGTCTTGCTGGCGTTTCGCGACGC  
GAGGCTGGATGGCCTTCCCATTATGATTCTTCTCGCTTCCGGCGGCATCGGGA

TGCCCCGCGTTGCAGGCCATGCTGTCCAGGCAGGTAGATGACGACCATCAGGGA  
CAGCTTCAAGGATCGCTCGCGGCTCTTACCAGCCTAACTTCGATCATTGGACCG  
CTGATCGTCACGGCGATTTATGCCGCCTCGGCGAGCACATGGAACGGGTTGGC  
ATGGATTGTAGGCGCCGCCCTATACCTTGTCTGCCTCCCCGCGTTGCGTTCGCG  
GTGCATGGAGCCGGGCCACCTCGACCTGAATGGAAGCCGGCGGCACCTCGCT  
AACGGATTCACCACTCCAAGAATTGGAGCCAATCAATTCTTGCGGAGAAGTGTG  
AATGCGCAAACCAACCCTTGGCAGAACATATCCATCGCGTCCGCCATCTCCAGC  
AGCCGCACGCGGCGCATCTCGGGCAGCGTTGGGTCCCTGGCCACGGGTGCGCA  
TGATCGTGCTCCTGTTCGTTGAGGACCCGGCTAGGCTGGCGGGGTTGCCTTACT  
GGTTAGCAGAATGAATCACCGATACGCGAGCGAACGTGAAGCGACTGCTGCTG  
CAAACGTCTGCGACCTGAGCAACAACATGAATGGTCTTCGGTTTCCGTGTTTC  
GTAAAGTCTGGAAACGCGGAAGTCCCCTACGTGCTGCTGAAGTTGCCCGCAAC  
AGAGAGTGGAAACCAACCGGTGATACCACGATACTATGACTGAGAGTCAACGCC  
ATGAGCGGCCTCATTCTTATTCTGAGTTACAACAGTCCGCACCGCTGTCCGGT  
AGCTCCTTCCGGTGGGCGCGGGGCATGACTATCGTCGCCGCACTTATGACTGT  
CTTCTTTATCATGCAACTCGTAGGACAGGTGCCGGCAGCGCCCAACAGTCCCCC  
GGCCACGGGGCCTGCCACCATACCCACGCCGAAACAAGCGCCCTGCACCATTA  
TGTTCCGGATCTGCATCGCAGGATGCTGCTGGCTACCCTGTGGAACACCTACAT  
CTGTATTAACGAAGCGCTAACCGTTTTTATCAGGCTCTGGGAGGCAGAATAAAT  
GATCATATCGTCAATTATTACCTCCACGGGGAGAGCCTGAGCAAACCTGGCCTCA  
GGCATTGAGAAGCACACGGTCACACTGCTTCCGGTAGTCAATAAACCGGTAAA  
CCAGCAATAGACATAAGCGGCTATTTAACGACCCTGCCCTGAACCGACGACCG  
GGTCGAATTTGCTTTTGAATTTCTGCCATTCATCCGCTTATTATCACTTATTCAGG  
CGTAGCACCAAGCGTTTTAAGGGCACCAATAACTGCCTTAAAAAAATTACGCCCC  
GCCCTGCCACTCATCGCAGTACTGTTGTAATTCATTAAGCATTCTGCCGACATG  
GAAGCCATCACAGACGGCATGATGAACCTGAATCGCCAGCGGCATCAGCACCT  
TGTCGCCTTGCGTATAATATTTGCCCATGGTGAAAACGGGGGCGAAGAAGTTGT  
CCATATTGGCCACGTTTAAATCAAACCTGGTGAAACTCACCCAGGGATTGGCTG  
AGACGAAAAACATATTCTCAATAAACCCTTTAGGGAAATAGGCCAGGTTTTTCACC  
GTAACACGCCACATCTTGCGAATATATGTGTAGAAACTGCCGGAATCGTCGTG  
GTATTCACTCCAGAGCGATGAAAACGTTTCAGTTTGCTCATGAAAACGGTGTA  
ACAAGGGTGAACACTATCCCATATCACCAGCTCACCGTCTTTCATTGCCATACG

pRC2303

GAATTCCGGATGAGCATTTCATCAGGCGGGCAAGAATGTGAATAAAGGCCGGAT  
AAAACCTTGTGCTTATTTTTCTTTACGGTCTTTAAAAAGGCCGTAATATCCAGCTGA  
ACGGTCTGGTTATAGGTACATTGAGCAACTGACTGAAATGCCTCAAATGTTCTT  
TACGATGCCATTGGGATATATCAACGGTGGTATATCCAGTGATTTTTTTCTCCAT  
TTAGCTTCCTTAGCTCCTGAAAATCTCGATAACTCAAAAAATACGCCCGGTAGT  
GATCTTATTTTATTATGGTGAAAGTTGGAACCTCTTACGTGCCGATCAACGTCTC  
ATTTTCGCCAAAAGTTGGCCCAGGGCTTCCCGGTATCAACAGGGACACCAGGAT  
TTATTTATTCTGCGAAGTGATCTTCCGTACAGGTATTTATTTCGGCGCAAAGTGC  
GTCGGGTGATGCTGCCAACTTACTGATTTAGTGTATGATGGTGTTTTTGAGGTG

CTCCAGTGGCTTCTGTTTCTATCAGCTGTCCCTCCTGTTTCAGCTACTGACGGGG  
TGGTGCGTAACGGCAAAGCACCGCCGGACATCAGCGCTAGCGGAGTGTATAC  
TGGCTTACTATGTTGGCACTGATGAGGGTGTGAGTGAAGTGTTCATGTGGCAG  
GAGAAAAAAGGCTGCACCGGTGCGTCAGCAGAATATGTGATACAGGATATATTC  
CGCTTCTCGCTCACTGACTCGCTACGCTCGGTGCTTCGACTGCGGCGAGCGG  
AAATGGCTTACGAACGGGGCGGAGATTTCTGGAAGATGCCAGGAAGATACTTA  
ACAGGGAAGTGAGAGGGGCCGCGGCAAAGCCGTTTTTCCATAGGCTCCGCCCCC  
CTGACAAGCATCACGAAATCTGACGCTCAAATCAGTGGTGGCGAAACCCGACA  
GGACTATAAAGATACCAGGCGTTTTCCCCTGGCGGCTCCCTCGTGCGCTCTCCT  
GTTCTGCTTTTCGGTTTACCGGTGTCATTCCGCTGTTATGGCCGCGTTTGTCT  
CATTCCACGCCTGACACTCAGTTCGCGGTAGGCAGTTCGCTCCAAGCTGGACT  
GTATGCACGAACCCCCCGTTTCAGTCCGACCGCTGCGCCTTATCCGGTAACTATC  
GTCTTGAGTCCAACCCGAAAGACATGCAAAGCACCACTGGCAGCAGCCACT  
GGTAATTGATTTAGAGGAGTTAGTCTTGAAGTCATGCGCCGGTTAAGGCTAAAC  
TGAAAGGACAAGTTTTGGTACTGCGCTCCTCCAAGCCAGTTACCTCGGTTCAA  
AGAGTTGGTAGCTCAGAGAACCTTCGAAAAACCGCCCTGCAAGGCGGTTTTTTC  
GTTTTCAGAGCAAGAGATTACGCGCAGACCAAACGATCTCAAGAAGATCATCT  
TATTAATCAGATAAAATATTTCTAGATTTTCAGTGCAATTTATCTCTTCAAATGTAG  
CACCTGAAGTCAGCCCCATACGATATAAGTTGTAATTCTCATGTTTGACAGCTTA  
TCATCGATAAGCTTTAATGCGGTAGTTTATCACAGTTAAATTGCTAACGCAGTCA  
GGCACCGTGTATGAAATCTAACAATGCGCTCATCGTCATCCTCGGCACCGTCAC  
CCTGGATGCTGTAGGCATAGGCTTGGTTATGCCGGTACTGCCGGGCTCTTGC  
GGGATTACGAAATCATCCTGTGGAGCTTAGTAGGTTTAGCAAGATGGCAGCGCC  
TAAATGTAGAATGATAAAAGGATTAAGAGATTAATTTCCCTAAAATGATAAAACA  
AGCGTTTTGAAAGCGCTTGTTTTTTTGGTTTGCAGTCAGAGTAGAATAGAAGTAT  
CAAAAAAAGCACCGACTCGGTGCCACTTTTTCAAGTTGATAACGGACTAGCCTT  
ATTTAACTTGCTATGCTGTTTTGAATGGTTCCAACAAGATTATTTTATAACTTTTA  
TAACAATAATCAAGGAGAAATTCAAAGAAATTTATCAGCCATAAAACAATACTTA  
ATACTATAGAATGATAACAAAATAAACTACTTTTTAAAAGAATTTTGTGTTATAATC  
TATTTATTATTAAGTATTGGGTAATATTTTTGAAGAGATATTTTAAAAAGAAAA  
TTAAAGCATATTAACCTAATTTTCGGAGGTCATTAAACTATTATTGAAATCATCAA  
ACTCATTATGGATTTAATTTAACTTTTTATTTTAGGAGGCCAAAATGGATAAGAA  
ATACTCAATAGGCTTAGCTATCGGCACAAATAGCGTCGGATGGGCGGTGATCAC  
TGATGAATATAAGGTTCCGTCTAAAAGTTCAAGGTTCTGGGAAATACAGACCG  
CCACAGTATCAAAAAAATCTTATAGGGGCTCTTTTATTTGACAGTGGAGAGACA  
GCGGAAGCGACTCGTCTCAAACGGACAGCTCGTAGAAGGTATACACGTCCGAA  
GAATCGTATTTGTTATCTACAGGAGATTTTTCAAATGAGATGGCGAAAGTAGAT  
GATAGTTTCTTTCATCGACTTGAAGAGTCTTTTTTGGTGGGAAGAAGACAAGAAGC  
ATGAACGTCATCCTATTTTTGGAAATATAGTAGATGAAGTTGCTTATCATGAGAA  
ATATCCAATCTATCATCTGCGAAAAAATTGGTAGATTCTACTGATAAAGCG  
GATTTGCGCTTAATCTATTTGGCCTTAGCGCATATGATTAAGTTTCGTGGTCATT  
TTTTGATTGAGGGAGATTTAAATCCTGATAATAGTGATGTGGACAACTATTTAT  
CCAGTTGGTACAAACCTACAATCAATTATTTGAAGAAAACCCTATTAACGCAAGT  
GGAGTAGATGCTAAAGCGATTCTTCTGCACGATTGAGTAAATCAAGACGATTA

GAAAATCTCATTGCTCAGCTCCCCGGTGAGAAGAAAAATGGCTTATTTGGGAAT  
CTCATTGCTTTGTCATTGGGTTTGACCCCTAATTTTAAATCAAATTTTGATTTGGC  
AGAAGATGCTAAATTACAGCTTTCAAAGATACTTACGATGATGATTTAGATAATT  
TATTGGCGCAAATTGGAGATCAATATGCTGATTTGTTTTTGGCAGCTAAGAATTT  
ATCAGATGCTATTTTACTTTTACAGATATCCTAAGAGTAAATACTGAAATAACTAAGG  
CTCCCCTATCAGCTTCAATGATTAACGCTACGATGAACATCATCAAGACTTGAC  
TCTTTTAAAAGCTTTAGTTTCGACAACAACCTCCAGAAAAGTATAAAGAAATCTTTT  
TTGATCAATCAAAAAACGGATATGCAGGTTATATTGATGGGGGAGCTAGCCAAG  
AAGAATTTTATAAATTTATCAAACCAATTTTAGAAAAAATGGATGGTACTGAGGAA  
TTATTGGTGAAACTAAATCGTGAAGATTTGCTGCGCAAGCAACGGACCTTTGAC  
AACGGCTCTATTCCCATCAAATTCACCTGGGTGAGCTGCATGCTATTTTGAGAA  
GACAAGAAGACTTTTATCCATTTTAAAAGACAATCGTGAGAAGATTGAAAAAAT  
CTTGACTTTTTCGAATTCCTTATTATGTTGGTCCATTGGCGCGTGGCAATAGTCGT  
TTTGCATGGATGACTCGGAAGTCTGAAGAAACAATTACCCCATGGAATTTTGAAG  
AAGTTGTCGATAAAGGTGCTTCAGCTCAATCATTTATTGAACGCATGACAACTT  
TGATAAAAATCTTCAAATGAAAAAGTACTACCAAACATAGTTTGCTTTATGAGT  
ATTTTACGGTTTATAACGAATTGACAAAGGTCAAATATGTTACTGAAGGAATGCG  
AAAACCAGCATTTCCTTTCAGGTGAACAGAAGAAAGCCATTGTTGATTTACTCTTC  
AAAACAAATCGAAAAGTAACCGTTAAGCAATTAAGAAGATTATTTCAAAAAAAT  
AGAATGTTTTGATAGTGTGAAATTTCAGGAGTTGAAGATAGATTTAATGCTTCAT  
TAGGTACCTACCATGATTTGCTAAAAATTATTAAGATAAAGATTTTTTGGATAAT  
GAAGAAAATGAAGATATCTTAGAGGATATTGTTTTAACATTGACCTTATTTGAAGA  
TAGGGAGATGATTGAGGAAAGACTTAAAACATATGCTCACCTCTTTGATGATAAG  
GTGATGAAACAGCTTAAACGTCGCCGTTATACTGGTTGGGGACGTTTGTCTCGA  
AAATTGATTAATGGTATTAGGGATAAGCAATCTGGCAAACAATATTAGATTTTTT  
GAAATCAGATGGTTTTGCCAATCGCAATTTTATGCAGCTGATCCATGATGATAGT  
TTGACATTTAAGAAGACATTCAAAAGCACAAAGTGTCTGGACAAGGCGATAGTT  
TACATGAACATATTGCAAATTTAGCTGGTAGCCCTGCTATTA AAAAAGGTATTTTA  
CAGACTGTAAAAGTTGTTGATGAATTGGTCAAAGTAATGGGGCGGCATAAGCCA  
GAAAATATCGTTATTGAAATGGCACGTGAAAATCAGACAACCTCAAAGGGCCAG  
AAAATTCGCGAGAGCGTATGAAACGAATCGAAGAAGGTATCAAAGAATTAGGA  
AGTCAGATTCTTAAAGAGCATCCTGTTGAAAATACTCAATTGCAAATGAAAAGC  
TCTATCTCTATTATCTCCAAAATGGAAGAGACATGTATGTGGACCAAGAATTAGA  
TATTAATCGTTTAAAGTATTATGATGTCGATGCCATTGTTCCACAAAGTTTCCTTA  
AAGACGATTCAATAGACAATAAGGTCTTAACGCGTTCTGATAAAAATCGTGGTAA  
ATCGGATAACGTTCCAAGTGAAGAAGTAGTCAAAAAGATGAAAAACTATTGGAG  
ACAACCTTCTAAACGCCAAGTTAATCACTCAACGTAAGTTTGATAATTTAACGAAA  
GCTGAACGTGGAGGTTTGAGTGAACCTTGATAAAGCTGGTTTTATCAAACGCCAA  
TTGGTTGAAACTCGCCAAATCACTAAGCATGTGGCACAAATTTTGGATAGTCGCA  
TGAATACTAAATACGATGAAAATGATAAACTTATTCGAGAGGTTAAAGTGATTAC  
CTTAAAATCTAAATTAGTTTCTGACTTCCGAAAAGATTTCCAATTCTATAAAGTAC  
GTGAGATTAACAATTACCATCATGCCATGATGCGTATCTAAATGCCGTCGTTGG  
AACTGCTTTGATTAAGAAATATCCAAAACCTTGAATCGGAGTTTGTCTATGGTGAT  
TATAAAGTTTATGATGTTTCGTAAAATGATTGCTAAGTCTGAGCAAGAAATAGGCA

AAGCAACCGCAAATATTTCTTTTACTCTAATATCATGAACTTCTTCAAAACAGAA  
ATTACACTTGCAAATGGAGAGATTGCGAAACGCCCTCTAATCGAACTAATGGG  
GAACTGGAGAAATTGTCTGGGATAAAGGGCGAGATTTTGCCACAGTGCGCAA  
GTATTGTCCATGCCCAAGTCAATATTGTCAAGAAAACAGAAGTACAGACAGGC  
GGATTCTCCAAGGAGTCAATTTTACCAAAAAGAAATTCGGACAAGCTTATTGCTC  
GTAAAAAAGACTGGGATCCAAAAAATATGGTGGTTTTGATAGTCCAACGGTAG  
CTTATTCAGTCCTAGTGGTTGCTAAGGTGGAAAAAGGGAAATCGAAGAAGTTAA  
AATCCGTTAAAGAGTTACTAGGGATCACAATTATGGAAAGAAGTTCCTTTGAAAA  
AAATCCGATTGACTTTTTAGAAAGCTAAAGGATATAAGGAAGTTAAAAAAGACTTA  
ATCATTAAACTACCTAAATATAGTCTTTTTGAGTTAGAAAACGGTTCGTAAACGGA  
TGCTGGCTAGTGCCGGAGAATTACAAAAGGAAATGAGCTGGCTCTGCCAAGC  
AAATATGTGAATTTTTTATATTTAGCTAGTCATTATGAAAAGTTGAAGGGTAGTCC  
AGAAGATAACGAACAAAACAATTGTTTGTGGAGCAGCATAAGCATTATTTAGAT  
GAGATTATTGAGCAAATCAGTGAATTTTCTAAGCGTGTTATTTTAGCAGATGCCA  
ATTTAGATAAAGTTCTTAGTGCATATAACAAACATAGAGACAAACCAATACGTGA  
ACAAGCAGAAAATATTATTCATTTATTTACGTTGACGAATCTTGGAGCTCCCGCT  
GCTTTTAAATATTTTGATACAACAATTGATCGTAAACGATATACGTCTACAAAAGA  
AGTTTTAGATGCCACTCTTATCCATCAATCCATCACTGGTCTTTATGAAACACGC  
ATTGATTTGAGTCAGCTAGGAGGTCCTAGGGGAGGTGGCTCAGAAGGTGGCGG  
ATCTGAAGGTGGCTCTGGAactagtATGAGCGATAAAATTATTCACCTGACTGACG  
ACAGTTTTGACACGGATGTACTCAAAGCGGACGGGGCGATCCTCGTTCGATTTCT  
GGGCAGAGTGGTGCGGTCCGTGCAAATGATCGCCCCGATTCTGGATGAAATC  
GCTGACGAATATCAGGGCAAACCTGACCGTTGCAAACCTGAACATCGATCAAAC  
CCTGGCACTGCGCCGAAATATGGCATCCGTGGTATCCCGACTCTGCTGCTGTTC  
AAAAACGGTGAAGTGGCGGCAACCAAAGTGGGTGCACTGTCTAAAGGTCAGTT  
GAAAGAGTTCCTCGACGCTAACCTGGCCGGTTCTGGTTCTGGCCATATGCACCA  
TCATCATCATCATTCTTCTGGTCTGGTGCCACGCGGTTCTGGTATGAAAGAAAC  
CGCTGCTGCTAAATTGAAACGCCAGCACATGGACAGCCCAGATCTGGGTACCG  
ACGACGACGACAAGGCCATGGCTGATATCggatccCATATGGAATGATGCTCGAT  
AAGAAACAGATTCGTGCGATCTTTCTTTGAGTTTAAAATGGGTCGCAAAGCG  
GCGGAGACGACGCGTAATATTAACAACGCGTTCGGTCCCTGGCACCGCGAACGA  
GCGTACCGTGCAATGGTGGTTCAAAAAGTTTCGCAAAGGCGACGAATCTCTGGA  
GGACGAAGAGCGTTCTGGCCGCCCGTCCGAGGTTGACAACGACCAGCTGCGTG  
CAATCATCGAAGCTGATCCGCTGACTACCACCCGCGAAGTTGCTGAAGAAGTGA  
ATGTGGATCACTCTACTGTGGTTCGCCACCTGAAACAGATCGGTAAAGTAAAA  
AACTGGACAAATGGGTTCCCTCATGAACTGTCTGAAAACCGAAAAACCGTCGTT  
TCGAAGTTAGCTCCTCTCTGATTCTGCGTAACAACAACGAACCGTTCCTGGATC  
GTATCGTAACCTGTGATGAGAAATGGATTCTGTATGATAACCGTCGCCGCTCTG  
CTCAGTGGCTGGATCGCGAAGAAGCTCCAAAACACTTCCCGAAACCGAATCTGC  
ACCAGAAGAAAGTCATGGTAACCGTATGGTGGTCTGCCGCAGGTGTTATCCACT  
ATTCCTTCTGAACCCGGGCGAAACTATCACCAGCGAAAAATACTGCCAGCAGA  
TTGACGAATGCACCGTAAACTGCAGCGTCTGCAGCCAGCACTGGTGAATCGTA  
AAGGTCCGATCCTGCTGCATGATAACGCCCGTCCGCACGTTGCCCAACCGACC  
CTGCAGAACTGAACGAACTGGGCTATGAAGTTCTGCCACACCCGCCGTA

CCGGATCTGTCCCCGACTGACTACCATTTCTTCAAGCATCTGGACAACCTCCTG  
CAGGGTAAACGTTTTTACAACCAACAGGACGCAGAAAACGCTTTCCAGGAGTTC  
GTCAAAGCCGTTCCACTGACTTCTACGCGACCCGGTATCAACAAGCTGATCAGC  
CGTTGGCAGAAATGCGTGGACTGTAACGGCAGCTACTTCGATTAAGACGTCTTA  
ATAACTAAAAATATGGTATAATACTCTTAATAAATGCAGTAATACAGGGGCTTTTC  
AAGACTGAAGTCTAGCTGAGACAAATAGTGCATTACGAAATTTTTTAGACAAAA  
ATAGTCTACGAGGTTTTAGAGCTATGCTGTTTTGAATGGTCCCAAACCTGAGACC  
AGTCTCGGAAGCTCAAAGGTCTCGTTTTAGAGCTATGCTGTTTTGAATGGTCCC  
AAAACCTCAGCACACTGAGACTTGTGAGTTCCATGTTTTAGAGCTATGCTGTTT  
TGAATGGACTCCATTCAACATTGCCGATGATAACTTGAGAAAGAGGGTTAATACC  
AGCAGTCGGATACCTTCCTATTCTTTCTGTTAAAGCGTTTTTCATGTTATAATAGG  
CAAAGAAGAGTAGTGTGATCGTCCATTCCGACAGCATCGCCAGTCACTATGGC  
GTGCTGCTAGCGCTATATGCGTTGATGCAATTTCTATGCGCACCCGTTCTCGGA  
GCACTGTCCGACCGCTTTGGCCGCCGCCAGTCCCTGCTCGCTTCGCTACTTGG  
AGCCACTATCGACTACGCGATCATGGCGACCACACCCGTCCTGTGGATCCTCTA  
CGCCGGACGCATCGTGGCCGGCATCACCGGCCGCCACAGGTGCGGTTGCTGGC  
GCCTATATCGCCGACATCACCGATGGGGAAGATCGGGCTCGCCACTTCGGGCT  
CATGAGCGCTTGTTCGCGGTGGGTATGGTGGCAGGCCCGTGGCCGGGGGA  
CTGTTGGGCGCCATCTCCTTGCATGCACCATTCTTGCGGCGGCGGTGCTCAA  
CGGCCTCAACCTACTACTGGGCTGCTTCCCTAATGCAGGAGTCGCATAAGGGAG  
AGCGTCGACCGATGCCCTTGAGAGCCTTCAACCCAGTCAGCTCCTTCCGGTGG  
GCGCGGGGCATGACTATCGTCGCCGCACTTATGACTGTCTTCTTTATCATGCAA  
CTCGTAGGACAGGTGCCGGCAGCGCTCTGGGTCATTTTCGGCGAGGACCGCTT  
TCGCTGGAGCGCGACGATGATCGGCCTGTCGCTTGCGGTATTCGGAATCTTGC  
ACGCCCTCGCTCAAGCCTTCGTCACTGGTCCCGCCACCAACGTTTCGGCGAG  
AAGCAGGCCATTATCGCCGGCATGGCGGCCGACGCGCTGGGCTACGTCTTGCT  
GGCGTTCGCGACGCGAGGCTGGATGGCCTTCCCATTATGATTCTTCTCGCTTC  
CGGCGGCATCGGGATGCCCGCGTTGCAGGCCATGCTGTCCAGGCAGGTAGAT  
GACGACCATCAGGGACAGCTTCAAGGATCGCTCGCGGCTCTTACCAGCCTAAC  
TTCGATCATTGGACCGCTGATCGTCACGGCGATTTATGCCGCCTCGGCGAGCA  
CATGGAACGGGTTGGCATGGATTGTAGGCGCCGCCCTATACCTTGTCTGCCTC  
CCCGCGTTGCGTCCGCGGTGCATGGAGCCGGGCCACCTCGACCTGAATGGAAG  
CCGGCGGCACCTCGCTAACGGATTCACCACTCCAAGAATTGGAGCCAATCAATT  
CTTGCGGAGAACTGTGAATGCGCAAACCAACCTTGGCAGAACATATCCATCGC  
GTCCGCCATCTCCAGCAGCCGCACGCGGCGCATCTCGGGCAGCGTTGGGTCTT  
GGCCACGGGTGCGCATGATCGTGCTCCTGTGCTTGGAGACCCGGCTAGGCTGG  
CGGGGTTGCCCTTACTGGTTAGCAGAATGAATCACCGATACGCGAGCGAACGTG  
AAGCGACTGCTGCTGAAAACGTCTGCGACCTGAGCAACAACATGAATGGTCTT  
CGGTTTTCCGTGTTTCGTAAAGTCTGGAAACGCGGAAGTCCCCTACGTGCTGCTG  
AAGTTGCCCGCAACAGAGAGTGGAACCAACCGGTGATACCACGATACTATGACT  
GAGAGTCAACGCCATGAGCGGCCTCATTTCTTATTCTGAGTTACAACAGTCCGC  
ACCGCTGTCCGGTAGCTCCTTCCGGTGGGCGCGGGGCATGACTATCGTCGCCG  
CACTTATGACTGTCTTCTTTATCATGCAACTCGTAGGACAGGTGCCGGCAGCGC  
CCAACAGTCCCCCGGCCACGGGGCCTGCCACCATACCCACGCCGAAACAAGC



GCCCTGCACCATTATGTTCCGGATCTGCATCGCAGGATGCTGCTGGCTACCCTG  
TGGAACACCTACATCTGTATTAACGAAGCGCTAACCGTTTTTATCAGGCTCTGG  
GAGGCAGAATAAATGATCATATCGTCAATTATTACCTCCACGGGGAGAGCCTGA  
GCAAACCTGGCCTCAGGCATTTGAGAAGCACACGGTCACACTGCTTCCGGTAGTC  
AATAAACCGGTAAACCAGCAATAGACATAAGCGGCTATTTAACGACCCTGCCCT  
GAACCGACGACCGGGTCTGAATTTGCTTTCTGAATTTCTGCCATTCATCCGCTTATT  
ATCACTTATTCAGGCGTAGCACCAGGCGTTTAAGGGCACCAATAACTGCCTTAA  
AAAAATTACGCCCCGCCCTGCCACTCATCGCAGTACTGTTGTAATTCATTAAGCA  
TTCTGCCGACATGGAAGCCATCACAGACGGCATGATGAACCTGAATCGCCAGC  
GGCATCAGCACCTTGTCGCCTTGCGTATAATATTTGCCCATGGTGAAAACGGGG  
GCGAAGAAGTTGTCCATATTGGCCACGTTTAAATCAAACCTGGTGAAACTCACC  
CAGGGATTGGCTGAGACGAAAAACATATTCTCAATAAACCCCTTTAGGGAAATAG  
GCCAGGTTTTCCACCGTAACACGCCACATCTTGCGAATATATGTGTAGAACTGC  
CGGAAATCGTCGTGGTATTCACTCCAGAGCGATGAAAACGTTTCAGTTTGCTCA  
TGGAACCGGTGTAACAAGGGTGAACACTATCCCATATCACCAGCTCACCGTCT  
TTCATTGCCATACG

pRC2304

GAATTCGGATGAGCATTTCATCAGGCGGGCAAGAATGTGAATAAAGGCCGGAT  
AAAACCTTGCTTATTTTTCTTTACGGTCTTTAAAAGGCCGTAATATCCAGCTGA  
ACGGTCTGGTTATAGGTACATTGAGCAACTGACTGAAATGCCTCAAATGTTCTT  
TACGATGCCATTGGGATATATCAACGGTGGTATATCCAGTGATTTTTTTCTCCAT  
TTTAGCTTCCTTAGCTCCTGAAAATCTCGATAACTCAAAAATACGCCCGGTAGT  
GATCTTATTTTATTATGGTGAAAGTTGGAACCTCTTACGTGCCGATCAACGTCTC  
ATTTTCGCCAAAAGTTGGCCCAGGGCTTCCCGGTATCAACAGGGACACCAGGAT  
TTATTTATTCTGCGAAGTGATCTTCCGTACAGGTATTTATTCGGCGCAAAGTGC  
GTCCGGGTGATGCTGCCAACTTACTGATTTAGTGTATGATGGTGTTTTTGAGGTG  
CTCCAGTGGCTTCTGTTTCTATCAGCTGTCCCTCCTGTTTCAGCTACTGACGGGG  
TGGTGCGTAACGGCAAAGCACCGCCGGACATCAGCGCTAGCGGAGTGTATAC  
TGGCTTACTATGTTGGCACTGATGAGGGTGTGAGTGAAGTGCTTCATGTGGCAG  
GAGAAAAAAGGCTGCACCGGTGCGTCAGCAGAATATGTGATACAGGATATATTC  
CGCTTCCTCGCTCACTGACTCGCTACGCTCGGTGCTTCGACTGCGGCGAGCGG  
AAATGGCTTACGAACGGGGCGGAGATTTCTGGAAGATGCCAGGAAGATACTTA  
ACAGGGAAGTGAGAGGGGCCGCGGCAAAGCCGTTTTTCCATAGGCTCCGCCCCC  
CTGACAAGCATCACGAAATCTGACGCTCAAATCAGTGGTGGCGAAACCCGACA  
GGACTATAAAGATACCAGGCGTTTTCCCCTGGCGGCTCCCTCGTGCGCTCTCCT  
GTTCTGCTTTCCGTTTACCGGTGTCATTCCGCTGTTATGGCCGCGTTTGTCT  
CATTCCACGCCTGACACTCAGTTCCGGGTAGGCAGTTCGCTCCAAGCTGGACT  
GTATGCACGAACCCCCCGTTTCAGTCCGACCGCTGCGCCTTATCCGGTAACTATC  
GTCTTGAGTCCAACCCGAAAGACATGCAAAGCACCACTGGCAGCAGCCACT  
GGTAATTGATTTAGAGGAGTTAGTCTTGAAGTCATGCGCCGGTTAAGGCTAAC  
TGAAAGGACAAGTTTTGGTGACTGCGCTCCTCCAAGCCAGTTACCTCGGTTCAA  
AGAGTTGGTAGCTCAGAGAACCTTCGAAAACCGCCCTGCAAGGCGGTTTTTTC

GTTTTCAGAGCAAGAGATTACGCGCAGACCAAACGATCTCAAGAAGATCATCT  
TATTAATCAGATAAAAATATTTCTAGATTTTCAGTGCAATTTATCTCTTCAAATGTAG  
CACCTGAAGTCAGCCCCATACGATATAAGTTGTAATTCTCATGTTTGACAGCTTA  
TCATCGATAAGCTTTAATGCGGTAGTTTATCACAGTTAAATTGCTAACGCAGTCA  
GGCACCGTGTATGAAATCTAACAAATGCGCTCATCGTCATCCTCGGCACCGTCAC  
CCTGGATGCTGTAGGCATAGGCTTGGTTATGCCGGTACTGCCGGGCCTCTTGC  
GGGATTACGAAATCATCCTGTGGAGCTTAGTAGGTTTAGCAAGATGGCAGCGCC  
TAAATGTAGAATGATAAAAGGATTAAGAGATTAATTTCCCTAAAAATGATAAAACA  
AGCGTTTTGAAAGCGCTTGTTTTTTTGGTTTGCAGTCAGAGTAGAATAGAAGTAT  
CAAAAAAGCACCGACTCGGTGCCACTTTTTCAAGTTGATAACGGACTAGCCTT  
ATTTAACTTGCTATGCTGTTTTGAATGGTTCCAACAAGATTATTTTATAACTTTTA  
TAACAAATAATCAAGGAGAAATTCAAAGAAATTTATCAGCCATAAAACAATACTTA  
ATACTATAGAATGATAACAAAATAAACTACTTTTTAAAAGAATTTTGTGTTATAATC  
TATTTATTATTAAGTATTGGGTAATATTTTTTTGAAGAGATATTTTGAAAAAGAAAA  
TTAAAGCATATTAACACTAATTTTCGGAGGTCATTAAACTATTATTGAAATCATCAA  
ACTCATGCATCATATGGAAATGATGCTCGATAAGAAACAGATTCGTGCGATCTTT  
CTCTTTGAGTTTAAAATGGGTTCGAAAGCGGCGGAGACGACGCGTAATATTAAC  
AACGCGTTCGGTCCTGGCACCGCGAACGAGCGTACCGTGCAATGGTGGTTCAA  
AAAGTTTCGCAAAGGCGACGAATCTCTGGAGGACGAAGAGCGTTCTGGCCGCC  
CGTCCGAGGTTGACAACGACCAGCTGCGTGCAATCATCGAAGCTGATCCGCTG  
ACTACCACCCGCGAAGTTGCTGAAGAAGTGAATGTGGATCACTCTACTGTGGTT  
CGCCACCTGAAACAGATCGGTAAAGTAAAAAACTGGACAAATGGGTTCTCAT  
GAACTGTCTGAAAACAGAAAAACCGTCGTTTCGAAGTTAGCTCCTCTCTGATTC  
TGCGTAACAACAACGAACCGTTCTGGATCGTATCGTAACCTGTGATGAGAAAT  
GGATTCTGTATGATAACCGTCGCCGCTCTGCTCAGTGGCTGGATCGCGAAGAA  
GCTCCAAAACACTTCCCAGAACCGAATCTGCACCAGAAGAAAGTCATGGTAACC  
GTATGGTGGTCTGCCGCAGGTGTTATCCACTATTCCTTCTGAACCCGGGCGAA  
ACTATCACCAGCGAAAAATACTGCCAGCAGATTGACGAAATGCACCGTAAACTG  
CAGCGTCTGCAGCCAGCACTGGTGAATCGTAAAGGTCGGATCCTGCTGCATGAT  
AACGCCCGTCCGCACGTTGCCCAACCGACCCTGCAGAACTGAACGAACCTGGG  
CTATGAAGTTCTGCCACACCCGCGTACTCCCCGGATCTGTCCCCGACTGACTA  
CCATTTCTTCAAGCATCTGGACAACCTTCTGCAGGGTAAACGTTTTTACAACCAA  
CAGGACGCAGAAAACGCTTTCCAGGAGTTCGTGCGAAAGCCGTTCCACTGACTTC  
TACGCGACCGGTATCAACAAGCTGATCAGCCGTTGGCAGAAATGCGTGACTG  
TAACGGCAGCTACTTCGATtctagaGGAGGTGGCTCAGAAGGTGGCGGATCTGAA  
GGTGGCTCTGGAactagtATGAGCGATAAAATTATTCACCTGACTGACGACAGTTT  
TGACACGGATGTACTIONAAAGCGGACGGGGCGATCCTCGTCGATTTCTGGGCAG  
AGTGGTGCGGTCCGTGCAAAATGATCGCCCCGATTCTGGATGAAATCGCTGAC  
GAATATCAGGGCAAACCTGACCGTTGCAAACTGAACATCGATCAAACCCCTGGC  
ACTGCGCCGAAATATGGCATCCGTGGTATCCCGACTCTGCTGCTGTTCAAAAAC  
GGTGAAGTGGCGGCAACCAAAGTGGGTGCACTGTCTAAAGGTCAGTTGAAAGA  
GTTCTCGACGCTAACCTGGCCGGTTCTGGTTCTGGCCATATGCACCATCATCA  
TCATCATTCTTCTGGTCTGGTGCCACGCGGTTCTGGTATGAAAGAAACCGCTGC  
TGCTAAATTCGAACGCCAGCACATGGACAGCCAGATCTGGGTACCGACGACG

ACGACAAGGCCATGGCTGATATCCTCGAGATGGATAAGAAATACTCAATAGGCT  
TAGCTATCGGCACAAATAGCGTCCGATGGGCGGTGATCACTGATGAATATAAGG  
TTCCGTCTAAAAAGTTCAAGGTTCTGGGAAATACAGACCGCCACAGTATCAAAA  
AAAATCTTATAGGGGCTCTTTTATTTGACAGTGGAGAGACAGCGGAAGCGACTC  
GTCTCAAACGGACAGCTCGTAGAAGGTATACACGTCGGAAGAATCGTATTTGTT  
ATCTACAGGAGATTTTTTCAAATGAGATGGCGAAAGTAGATGATAGTTTCTTTCA  
TCGACTTGAAGAGTCTTTTTTGGTGGAGAAGACAAGAAGCATGAACGTCATCC  
TATTTTTGGAAATATAGTAGATGAAGTTGCTTATCATGAGAAATATCCAATCT  
ATCATCTGCGAAAAAATTGGTAGATTCTACTGATAAAGCGGATTTGCGCTTAAT  
CTATTTGGCCTTAGCGCATATGATTAAGTTTCGTGGTCATTTTTTGATTGAGGGA  
GATTTAAATCCTGATAATAGTGATGTGGACAAACTATTTATCCAGTTGGTACAAA  
CCTACAATCAATTATTTGAAGAAAACCCTATTAACGCAAGTGGAGTAGATGCTAA  
AGCGATTCTTTCTGCACGATTGAGTAAATCAAGACGATTAGAAAATCTCATTGCT  
CAGCTCCCCGGTGAGAAGAAAAATGGCTTATTTGGGAATCTCATTGCTTTGTCAT  
TGGGTTTGACCCCTAATTTTAAATCAAATTTTGATTTGGCAGAAGATGCTAAATTA  
CAGCTTTCAAAGATACTTACGATGATGATTTAGATAATTTATTGGCGCAAATTG  
GAGATCAATATGCTGATTTGTTTTTGGCAGCTAAGAATTTATCAGATGCTATTTTA  
CTTTCAGATATCCTAAGAGTAAATACTGAAATAACTAAGGCTCCCCTATCAGCTT  
CAATGATTAACGCTACGATGAACATCATCAAGACTTGACTCTTTTAAAAGCTTT  
AGTTCGACAACAACCTCCAGAAAAGTATAAAGAAATCTTTTTTGATCAATCAAAAA  
ACGGATATGCAGGTTATATTGATGGGGGAGCTAGCCAAGAAGAATTTTATAAATT  
TATCAAACCAATTTTAGAAAAAATGGATGGTACTGAGGAATTATTGGTGAAACTA  
AATCGTGAAGATTTGCTGCGCAAGCAACGGACCTTTGACAACGGCTCTATTCCC  
CATCAAATTCACCTGGGTGAGCTGCATGCTATTTTGAGAAGACAAGAAGACTTTT  
ATCCATTTTTAAAAGACAATCGTGAGAAGATTGAAAAAATCTTGACTTTTGAATT  
CCTTATTATGTTGGTCCATTGGCGCGTGGCAATAGTCGTTTTGCATGGATGACT  
CGGAAGTCTGAAGAAACAATTACCCCATGGAATTTTGAAGAAGTTGTGCATAAA  
GGTGCTTCAGCTCAATCATTTATTGAACGCATGACAAACTTTGATAAAAATCTTC  
CAAATGAAAAAGTACTACCAAACATAGTTTGCTTTATGAGTATTTTACGGTTTAT  
AACGAATTGACAAAGGTCAAATATGTTACTGAAGGAATGCGAAAACCAGCATTTC  
TTTCAGGTGAACAGAAGAAAGCCATTGTTGATTTACTCTTCAAACAAATCGAAA  
AGTAACCGTTAAGCAATTAAGAAGATTATTTCAAAAAAATAGAATGTTTTGATA  
GTGTTGAAATTTAGGAGTTGAAGATAGATTTAATGCTTCATTAGGTACCTACCA  
TGATTTGCTAAAATTTAAGATAAAGATTTTTTGGATAATGAAGAAAATGAAG  
ATATCTTAGAGGATATTGTTTTAACATTGACCTTATTTGAAGATAGGGAGATGATT  
GAGGAAAGACTTAAAACATATGCTCACCTCTTTGATGATAAGGTGATGAAACAG  
CTTAAACGTCGCCGTTATACTGGTTGGGGACGTTTGTCTCGAAAATTGATTAATG  
GTATTAGGGATAAGCAATCTGGCAAACAATATTAGATTTTTTGAATCAGATGG  
TTTTGCCAATCGCAATTTTATGCAGCTGATCCATGATGATAGTTTGACATTTAAA  
GAAGACATTCAAAAAGCACAAGTGTCTGGACAAGGCGATAGTTTACATGAACAT  
ATTGCAATTTAGCTGGTAGCCCTGCTATTA AAAAAGGTATTTTACAGACTGTAA  
AAGTTGTTGATGAATTGGTCAAAGTAATGGGGCGGCATAAGCCAGAAAATATCG  
TTATTGAAATGGCACGTGAAAATCAGACAACTCAAAGGGCCAGAAAATTCGC  
GAGAGCGTATGAAACGAATCGAAGAAGGTATCAAAGAATTAGGAAGTCAGATTC

TTAAAGAGCATCCTGTTGAAAATACTCAATTGCAAATGAAAAGCTCTATCTCTAT  
TATCTCCAAAATGGAAGAGACATGTATGTGGACCAAGAATTAGATATTAATCGTT  
TAAGTGATTATGATGTCGATGCCATTGTTCCACAAAGTTTCCTTAAAGACGATTC  
AATAGACAATAAGGTCTTAACGCGTTCTGATAAAAATCGTGGTAAATCGGATAAC  
GTTCCAAGTGAAGAAGTAGTCAAAAAGATGAAAACTATTGGAGACAACCTTCTAA  
ACGCCAAGTTAATCACTCAACGTAAGTTTGATAATTTAACGAAAGCTGAACGTGG  
AGGTTTGAGTGAACCTTGATAAAGCTGGTTTTATCAAACGCCAATTGGTTGAACT  
CGCCAAATCACTAAGCATGTGGCACAAATTTGGATAGTCGCATGAATACTAAAT  
ACGATGAAAATGATAAACTTATTCGAGAGGTTAAAGTGATTACCTTAAAATCTAA  
ATTAGTTTCTGACTTCCGAAAAGATTTCCAATTCTATAAAGTACGTGAGATTAACA  
ATTACCATCATGCCCATGATGCGTATCTAAATGCCGTCGTTGGAACCTGCTTTGAT  
TAAGAAATATCCAAAACCTTGAATCGGAGTTTGTCTATGGTGATTATAAAGTTTATG  
ATGTTTCGTA AAAATGATTGCTAAGTCTGAGCAAGAAATAGGCAAAGCAACCGCAA  
AATATTTCTTTACTCTAATATCATGAACTTCTTCAAACAGAAATTACACTTGCA  
AATGGAGAGATTGCGAAACGCCCTCTAATCGAACTAATGGGGAACTGGAGAA  
ATTGTCTGGGATAAAGGGCGAGATTTGCCACAGTGC GCAAAGTATTGTCCATG  
CCCAAGTCAATATTGTCAAGAAAACAGAAGTACAGACAGGCGGATTCTCCAAG  
GAGTCAATTTTACCAAAAAGAAATTCGGACAAGCTTATTGCTCGTAAAAAAGACT  
GGGATCCAAAAAATATGGTGGTTTTGATAGTCCAACGGTAGCTTATTCAGTCCT  
AGTGGTTGCTAAGGTGGAAAAGGGAAATCGAAGAAGTTAAAATCCGTTAAAGA  
GTTACTAGGGATCACAATTATGGAAAGAAGTTCCTTTGAAAAAATCCGATTGAC  
TTTTTAGAAGCTAAAGGATATAAGGAAGTTAAAAAAGACTTAATCATTAACTACC  
TAAATATAGTCTTTTTGAGTTAGAAAACGGTCGTAAACGGATGCTGGCTAGTGCC  
GGAGAATTACAAAAGGAAATGAGCTGGCTCTGCCAAGCAAATATGTGAATTTTT  
TATATTTAGCTAGTCATTATGAAAAGTTGAAGGGTAGTCCAGAAGATAACGAACA  
AAAACAATTGTTTGTGGAGCAGCATAAGCATTATTTAGATGAGATTATTGAGCAA  
ATCAGTGAATTTTCTAAGCGTGTTATTTTAGCAGATGCCAATTTAGATAAAGTTCT  
TAGTGCATATAACAAACATAGAGACAAACCAATACGTGAACAAGCAGAAAATATT  
ATTCATTTATTTACGTTGACGAATCTTGGAGCTCCCGCTGCTTTTAAATATTTTGA  
TACAACAATTGATCGTAAACGATATACGTCTACAAAAGAAGTTTTAGATGCCACT  
CTTATCCATCAATCCATCACTGGTCTTTATGAAACACGCATTGATTTGAGTCAGC  
TAGGAGGTGACTGAAGTATATTTTAGATGAAGATTATTTCTTAATAACTAAAAATA  
TGGTATAACTCTTAATAAATGCAGTAATACAGGGGCTTTTCAAGACTGAAGTC  
TAGCTGAGACAAATAGTGCGATTACGAAATTTTTAGACAAAATAGTCTACGAG  
GTTTTAGAGCTATGCTGTTTTGAATGGTCCCAAACGGTTTTCCAGTCACGACG  
TTGTAAAACGAGTTTTAGAGCTATGCTGTTTTGAATGGTCCCAAACCTTCAGCAC  
ACTGAGACTTGTTGAGTTCCATGTTTTAGAGCTATGCTGTTTTGAATGGACTCCA  
TTCAACATTGCCGATGATAACTTGAGAAAGAGGGTTAATACCAGCAGTCGGATA  
CCTTCTATTCTTTCTGTTAAAGCGTTTTTCATGTTATAATAGGCAAAGAAGAGTA  
GTGTGATCGTCCATTCCGACAGCATCGCCAGTCACTATGGCGTGCTGCTAGCG  
CTATATGCGTTGATGCAATTTCTATGCGCACCCGTTCTCGGAGCACTGTCCGAC  
CGCTTTGGCCGCCGCCAGTCCTGCTCGCTTCTGCTACTTGGAGCCACTATCGA  
CTACGCGATCATGGCGACCACACCCGTCCTGTGGATCCTCTACGCCGGACGCA  
TCGTGGCCGGCATCACCGGCCACAGGTGCGGTTGCTGGCGCCTATATCGCC

GACATCACCGATGGGGAAGATCGGGCTCGCCACTTCGGGCTCATGAGCGCTTG  
TTTCGGCGTGGGTATGGTGGCAGGCCCGTGGCCGGGGGACTGTTGGGCGCC  
ATCTCCTTGCATGCACCATTCCCTTGCGGCGGCGGTGCTCAACGGCCTCAACCTA  
CTACTGGGCTGCTTCTAATGCAGGAGTCGCATAAGGGAGAGCGTCGACCGAT  
GCCCTTGAGAGCCTTCAACCCAGTCAGCTCCTTCCGGTGGGCGCGGGGCATGA  
CTATCGTCGCCGCACTTATGACTGTCTTCTTTATCATGCAACTCGTAGGACAGGT  
GCCGGCAGCGCTCTGGGTCATTTTTCGGCGAGGACCGCTTTCGCTGGAGCGCGA  
CGATGATCGGCCTGTGCTTGCGGTATTCGGAATCTTGCACGCCCTCGCTCAAG  
CCTTCGTCACTGGTCCC GCCACCAAACGTTTCGGCGAGAAGCAGGCCATTATC  
GCCGGCATGGCGGCCGACGCGCTGGGCTACGTCTTGCTGGCGTTTCGCGACGC  
GAGGCTGGATGGCCTTCCCATTATGATTCTTCTCGCTTCCGGCGGCATCGGGA  
TGCCCGCGTTGCAGGCCATGCTGTCCAGGCAGGTAGATGACGACCATCAGGGA  
CAGCTTCAAGGATCGCTCGCGGCTCTTACCAGCCTAACTTCGATCATTGGACCG  
CTGATCGTCACGGCGATTTATGCCGCCTCGGCGAGCACATGGAACGGGTTGGC  
ATGGATTGTAGGCGCCGCCCTATACCTTGTCTGCCTCCCCGCGTTGCGTCGCG  
GTGCATGGAGCCGGGCCACCTCGACCTGAATGGAAGCCGGCGGCACCTCGCT  
AACGGATTCACTCCAAGAATTGGAGCCAATCAATTCTTGCGGAGA ACTGTG  
AATGCGCAAACCAACCCTTGGCAGAACATATCCATCGCGTCCGCCATCTCCAGC  
AGCCGCACGCGGCATCTCGGGCAGCGTTGGGTCCCTGGCCACGGGTGCGCA  
TGATCGTGCTCCTGTGCTT GAGGACCCGGCTAGGCTGGCGGGGTTGCCTTACT  
GGTTAGCAGAATGAATCACCGATACGCGAGCGAACGTGAAGCGACTGCTGCTG  
CAAACGTCTGCGACCTGAGCAACAACATGAATGGTCTTCGGTTTCCGTGTTTC  
GTAAAGTCTGGAAACGCGGAAGTCCCCTACGTGCTGCTGAAGTTGCCCGCAAC  
AGAGAGTGGAAACCAACCGGTGATAACCACGATACTATGACTGAGAGTCAACGCC  
ATGAGCGGCCTCATTCTTATTCTGAGTTACAACAGTCCGCACCGCTGTCCGGT  
AGCTCCTTCCGGTGGGCGCGGGGCATGACTATCGTCGCCGCACTTATGACTGT  
CTTCTTTATCATGCAACTCGTAGGACAGGTGCCGGCAGCGCCCAACAGTCCCC  
GGCCACGGGGCCTGCCACCATACCCACGCCGAAACAAGCGCCCTGCACCATTA  
TGTTCCGGATCTGCATCGCAGGATGCTGCTGGCTACCCTGTGGAACACCTACAT  
CTGTATTAACGAAGCGCTAACCGTTTTTATCAGGCTCTGGGAGGCAGAATAAAT  
GATCATATCGTCAATTATTACCTCCACGGGGAGAGCCTGAGCAA ACTGGCCTCA  
GGCATTGAGAAGCACACGGTCACACTGCTTCCGGTAGTCAATAAACCGGTAAA  
CCAGCAATAGACATAAGCGGCTATTTAACGACCCTGCCCTGAACCGACGACCG  
GGTCGAATTTGCTTTCGAATTTCTGCCATT CATCCGCTTATTATCACTTATTCAGG  
CGTAGCACCAGGCGTTTAAAGGGCACCAATAACTGCCTTAAAAAAATTACGCCCC  
GCCCTGCCACTCATCGCAGTACTGTTGTAATTCATTAAGCATTCTGCCGACATG  
GAAGCCATCACAGACGGCATGATGAACCTGAATCGCCAGCGGCATCAGCACCT  
TGTCGCCTTGCGTATAATATTTGCCCATGGTGAAAACGGGGGCGAAGAAGTTGT  
CCATATTGGCCACGTTTAAATCAA ACTGGTGAACTCACCCAGGGATTGGCTG  
AGACGAAAAACATATTCTCAATAAACCTTTAGGGAAATAGGCCAGGTTTTCCACC  
GTAACACGCCACATCTTGCGAATATATGTGTAGAACTGCCGGAATCGTCGTG  
GTATTCACTCCAGAGCGATGAAAACGTTTCAGTTTGCTCATGAAAACGGGTGTA  
ACAAGGGTGAACACTATCCCATATCACCAGCTCACCGTCTTTCATTGCCATACG

pRC2305

GAATTCCGGATGAGCATTTCATCAGGCGGGCAAGAATGTGAATAAAGGCCGGAT  
AAAAC TTGTGCTTATTTTTCTTTACGGTCTTTAAAAAGGCCGTAATATCCAGCTGA  
ACGGTCTGGTTATAGGTACATTGAGCAACTGACTGAAATGCCTCAAAATGTTCTT  
TACGATGCCATTGGGATATATCAACGGTGGTATATCCAGTGATTTTTTTCTCCAT  
TTAGCTTCCTTAGCTCCTGAAAATCTCGATAACTCAAAAAATACGCCCGGTAGT  
GATCTTATTTTATTATGGTGAAAGTTGGAACCTCTTACGTGCCGATCAACGTCTC  
ATTTTCGCCAAAAGTTGGCCCAGGGCTTCCCGGTATCAACAGGGACACCAGGAT  
TTATTTATTCTGCGAAGTGATCTTCCGTACAGGTATTTATTCGGCGCAAAGTGC  
GTCGGGTGATGCTGCCAACTTACTGATTTAGTGTATGATGGTGTTTTTGAGGTG  
CTCCAGTGGCTTCTGTTTCTATCAGCTGTCCCTCCTGTTTCAGCTACTGACGGGG  
TGGTGCGTAACGGCAAAGCACCGCCGGACATCAGCGCTAGCGGAGTGTATAC  
TGGCTTACTATGTTGGCACTGATGAGGGTGTGAGTGAAGTGCTTCATGTGGCAG  
GAGAAAAAGGCTGCACCGGTGCGTCAGCAGAATATGTGATACAGGATATATTC  
CGCTTCTCGCTCACTGACTCGCTACGCTCGGTGCTTCGACTGCGGCGAGCGG  
AAATGGCTTACGAACGGGGCGGAGATTTCTGGAAGATGCCAGGAAGATACTTA  
ACAGGGAAGTGAGAGGGCCGCGCAAAGCCGTTTTTCCATAGGCTCCGCCCC  
CTGACAAGCATCACGAAATCTGACGCTCAAATCAGTGGTGGCGAAACCCGACA  
GGACTATAAAGATACCAGGCGTTTTCCCCTGGCGGCTCCCTCGTGCGCTCTCCT  
GTTCTGCTTTTCGGTTTACCGGTGTCATTCCGCTGTTATGGCCGCGTTTGTCT  
CATTCCACGCCTGACACTCAGTTCGGGGTAGGCAGTTCGCTCCAAGCTGGACT  
GTATGCACGAACCCCCCGTTCAGTCCGACCGCTGCGCCTTATCCGGTAACTATC  
GTCTTGAGTCCAACCCGGAAAGACATGCAAAGCACCACTGGCAGCAGCCACT  
GGTAATTGATTTAGAGGAGTTAGTCTTGAAGTCATGCGCCGGTTAAGGCTAAAC  
TGAAAGGACAAGTTTTGGTGACTGCGCTCCTCCAAGCCAGTTACCTCGGTTCAA  
AGAGTTGGTAGCTCAGAGAACCTTCGAAAAACCGCCCTGCAAGGCGGTTTTTTC  
GTTTTCAGAGCAAGAGATTACGCGCAGACCAAACGATCTCAAGAAGATCATCT  
TATTAATCAGATAAAATATTTCTAGATTTTCAAGTGCATTTATCTCTTCAAATGTAG  
CACCTGAAGTCAGCCCCATACGATATAAGTTGTAATTCTCATGTTTGACAGCTTA  
TCATCGATAAGCTTTAATGCGGTAGTTTATCACAGTTAAATTGCTAACGCAGTCA  
GGCACCGTGTATGAAATCTAACAAATGCGCTCATCGTCATCCTCGGCACCGTCAC  
CCTGGATGCTGTAGGCATAGGCTTGGTTATGCCGGTACTGCCGGGCTCTTGC  
GGGATTACGAAATCATCCTGTGGAGCTTAGTAGGTTTAGCAAGATGGCAGCGCC  
TAAATGTAGAATGATAAAAGGATTAAGAGATTAATTTCCCTAAAAATGATAAAACA  
AGCGTTTTGAAAGCGCTTGTTTTTTTGGTTTGCAGTCAGAGTAGAATAGAAGTAT  
CAAAAAAAGCACCGACTCGGTGCCACTTTTTCAAGTTGATAACGGACTAGCCTT  
ATTTAACTTGCTATGCTGTTTTGAATGGTTCCAACAAGATTATTTTATAACTTTTA  
TAACAAATAATCAAGGAGAAATTCAAAGAAATTTATCAGCCATAAAACAATACTTA  
ATACTATAGAATGATAACAAAATAAACTACTTTTTAAAAGAATTTTGTGTTATAATC  
TATTTATTATTAAGTATTGGGTAATATTTTTTTGAAGAGATATTTTAAAAAGAAAA  
TTAAAGCATATTAACCTAATTTTCGGAGGTCATTAACCTATTATTGAAATCATCAA  
ACTCATTATGGATTTAATTTAACTTTTTATTTTAGGAGGCAAAAATGGATAAGAA  
ATACTCAATAGGCTTAGCTATCGGCACAAATAGCGTCGGATGGGCGGTGATCAC  
TGATGAATATAAGGTTCCGTCTAAAAAGTTCAAGGTTCTGGGAAATACAGACCG

CCACAGTATCAAAAAAATCTTATAGGGGCTCTTTTATTTGACAGTGGAGAGACA  
GCGGAAGCGACTCGTCTCAAACGGACAGCTCGTAGAAGGTATACACGTCCGAA  
GAATCGTATTTGTTATCTACAGGAGATTTTTTCAAATGAGATGGCGAAAGTAGAT  
GATAGTTTCTTTTCATCGACTTGAAGAGTCTTTTTTGGTGGGAAGAAGACAAGAAGC  
ATGAACGTCATCCTATTTTTGGAAATATAGTAGATGAAGTTGCTTATCATGAGAA  
ATATCCAACCTATCTATCATCTGCGAAAAAATTGGTAGATTCTACTGATAAAGCG  
GATTTGCGCTTAATCTATTTGGCCTTAGCGCATATGATTAAGTTTCGTGGTCATT  
TTTTGATTGAGGGAGATTTAAATCCTGATAATAGTGATGTGGACAAACTATTTAT  
CCAGTTGGTACAAACCTACAATCAATTATTTGAAGAAAACCCTATTAACGCAAGT  
GGAGTAGATGCTAAAGCGATTCTTTCTGCACGATTGAGTAAATCAAGACGATTA  
GAAAATCTCATTGCTCAGCTCCCCGGTGAGAAGAAAAATGGCTTATTTGGGAAT  
CTCATTGCTTTGTCATTGGGTTTGACCCCTAATTTTAAATCAAATTTTGATTTGGC  
AGAAGATGCTAAATTACAGCTTTCAAAGATACTTACGATGATGATTTAGATAATT  
TATTGGCGCAAATTGGAGATCAATATGCTGATTTGTTTTTGGCAGCTAAGAATTT  
ATCAGATGCTATTTTACTTTTCAAGATATCCTAAGAGTAAATACTGAAATAACTAAGG  
CTCCCCTATCAGCTTCAATGATTAACGCTACGATGAACATCATCAAGACTTGAC  
TCTTTTAAAAGCTTTAGTTTCGACAACAACCTCCAGAAAAGTATAAAGAAATCTTTT  
TTGATCAATCAAAAAACGGATATGCAGGTTATATTGATGGGGGAGCTAGCCAAG  
AAGAATTTTATAAATTTATCAAACCAATTTTAGAAAAAATGGATGGTACTGAGGAA  
TTATTGGTGAAACTAAATCGTGAAGATTTGCTGCGCAAGCAACGGACCTTTGAC  
AACGGCTCTATTCCCATCAAATTCACTTGGGTGAGCTGCATGCTATTTTGAGAA  
GACAAGAAGACTTTTTATCCATTTTTAAAAGACAATCGTGAGAAGATTGAAAAAAT  
CTTGACTTTTTCGAATTCCTTATTATGTTGGTCCATTGGCGCGTGGCAATAGTCGT  
TTTGCATGGATGACTCGGAAGTCTGAAGAAACAATTACCCCATGGAATTTTGAAG  
AAGTTGTCGATAAAGGTGCTTCAGCTCAATCATTTATTGAACGCATGACAAACTT  
TGATAAAAATCTTCAAATGAAAAAGTACTACCAAACATAGTTTGCTTTATGAGT  
ATTTTACGGTTTATAACGAATTGACAAAGGTCAAATATGTTACTGAAGGAATGCG  
AAAACCAGCATTTCCTTTCAGGTGAACAGAAGAAAGCCATTGTTGATTTACTCTTC  
AAAACAAATCGAAAAGTAACCGTTAAGCAATTAAGAAGATTATTTCAAAAAAAT  
AGAATGTTTTGATAGTGTTGAAATTTCAAGGAGTTGAAGATAGATTTAATGCTTCAT  
TAGGTACCTACCATGATTTGCTAAAATTTAATAAGATAAAGATTTTTTGGATAAT  
GAAGAAAATGAAGATATCTTAGAGGATATTGTTTTAACATTGACCTTATTTGAAGA  
TAGGGAGATGATTGAGGAAAGACTTAAAACATATGCTCACCTCTTTGATGATAAG  
GTGATGAAACAGCTTAAACGTCGCCGTTATACTGGTTGGGGACGTTTGTCTCGA  
AAATTGATTAATGGTATTAGGGATAAGCAATCTGGCAAACAATATTAGATTTTTT  
GAAATCAGATGGTTTTGCCAATCGCAATTTTATGCAGCTGATCCATGATGATAGT  
TTGACATTTAAAGAAGACATTCAAAAGCACAAAGTGTCTGGACAAGGCGATAGTT  
TACATGAACATATTGCAAATTTAGCTGGTAGCCCTGCTATTA AAAAAGGTATTTTA  
CAGACTGTAAAAGTTGTTGATGAATTGGTCAAAGTAATGGGGCGGCATAAGCCA  
GAAAATATCGTTATTGAAATGGCACGTGAAAATCAGACAACCTCAAAGGGCCAG  
AAAATTCGCGAGAGCGTATGAAACGAATCGAAGAAGGTATCAAAGAATTAGGA  
AGTCAGATTCTTAAAGAGCATCCTGTTGAAAATACTCAATTGCAAATGAAAAGC  
TCTATCTCTATTATCTCCAAAATGGAAGAGACATGTATGTGGACCAAGAATTAGA  
TATTAATCGTTAAGTGATTATGATGTCGATGCCATTGTTCCACAAAGTTTCCTTA

AAGACGATTCAATAGACAATAAGGTCTTAACGCGTTCTGATAAAAATCGTGGTAA  
ATCGGATAACGTTCCAAGTGAAGAAGTAGTCAAAAAGATGAAAACTATTGGAG  
ACAACCTTCTAAACGCCAAGTTAATCACTCAACGTAAGTTTGATAATTTAACGAAA  
GCTGAACGTGGAGGTTTGAGTGAACCTTGATAAAGCTGGTTTTATCAAACGCCAA  
TTGGTTGAAACTCGCCAAATCACTAAGCATGTGGCACAAATTTTGGATAGTCGCA  
TGAATACTAAATACGATGAAAATGATAAACTTATTTCGAGAGGTTAAAGTGATTAC  
CTTAAAATCTAAATTAGTTTCTGACTTCCGAAAAGATTTCCAATTCTATAAAGTAC  
GTGAGATTAACAATTACCATCATGCCATGATGCGTATCTAAATGCCGTCGTTGG  
AACTGCTTTGATTAAGAAATATCCAAAACCTTGAATCGGAGTTTGTCTATGGTGAT  
TATAAAGTTTATGATGTTTCGTAAAATGATTGCTAAGTCTGAGCAAGAAATAGGCA  
AAGCAACCGCAAATATTTCTTTTACTCTAATATCATGAACTTCTTCAAACAGAA  
ATTACACTTGCAAATGGAGAGATTGCAAAACGCCCTCTAATCGAACTAATGGG  
GAACTGGAGAAATTGTCTGGGATAAAGGGCGAGATTTTGCCACAGTGCGCAA  
GTATTGTCCATGCCCAAGTCAATATTGTCAAGAAAACAGAAGTACAGACAGGC  
GGATTCTCAAGGAGTCAATTTTACCAAAAAGAAATTCGGACAAGCTTATTGCTC  
GTAAAAAAGACTGGGATCCAAAAAATATGGTGGTTTTGATAGTCCAACGGTAG  
CTTATTCAGTCCTAGTGGTTGCTAAGGTGGAAAAGGGAAATCGAAGAAGTTAA  
AATCCGTTAAAGAGTTACTAGGGATCACAATTATGGAAAGAAGTTCCTTTGAAAA  
AAATCCGATTGACTTTTTAGAACTAAAGGATATAAGGAAGTTAAAAAAGACTTA  
ATCATTAACTACCTAAATATAGTCTTTTTGAGTTAGAAAACGGTCGTAAACGGA  
TGCTGGCTAGTGCCGGAGAATTACAAAAGGAAATGAGCTGGCTCTGCCAAGC  
AAATATGTGAATTTTTTATATTTAGCTAGTCATTATGAAAAGTTGAAGGGTAGTCC  
AGAAGATAACGAACAAAAACAATTGTTTGTGGAGCAGCATAAGCATTATTTAGAT  
GAGATTATTGAGCAAATCAGTGAATTTTCTAAGCGTGTTATTTTAGCAGATGCCA  
ATTTAGATAAAGTTCTTAGTGATATAACAAACATAGAGACAAACCAATACGTGA  
ACAAGCAGAAAATATTATTCATTTATTTACGTTGACGAATCTTGGAGCTCCCGCT  
GCTTTTAAATATTTTGATACAACAATTGATCGTAAACGATATACGTCTACAAAAGA  
AGTTTTAGATGCCACTCTTATCCATCAATCCATCACTGGTCTTTATGAAACACGC  
ATTGATTTGAGTCAGCTAGGAGGTCCTAGGGGAGGTGGCTCAGAAGGTGGCGG  
ATCTGAAGGTGGCTCTGGAactagtATGAGCGATAAAATTATTCACCTGACTGACG  
ACAGTTTTGACACGGATGTACTCAAAGCGGACGGGGCGATCCTCGTGCATTTCT  
GGGCAGAGTGGTGCGGTCCGTGCAAAATGATCGCCCCGATTCTGGATGAAATC  
GCTGACGAATATCAGGGCAAACCTGACCGTTGCAAACTGAACATCGATCAAAC  
CCTGGCACTGCGCCGAAATATGGCATCCGTGGTATCCCGACTCTGCTGCTGTTC  
AAAAACGGTGAAGTGGCGGCAACCAAAGTGGGTGCACTGTCTAAAGGTCAGTT  
GAAAGAGTTCCTCGACGCTAACCTGGCCGGTTCTGGTTCTGGCCATATGCACCA  
TCATCATCATATTCTTCTGGTCTGGTGCCACGCGGTTCTGGTATGAAAGAAAC  
CGCTGCTGCTAAATTGAAACGCCAGCACATGGACAGCCCAGATCTGGGTACCG  
ACGACGACGACAAGGCCATGGCTGATATCggatccCATATGGAATGATGCTCGAT  
AAGAAACAGATTCGTGCGATCTTTCTTTTGGAGTTTAAAATGGGTCGCAAAGCG  
GCGGAGACGACGCGTAATATTAACAACGCGTTCGGTCTTGGCACCGCGAACGA  
GCGTACCGTGCAATGGTGGTTCAAAAAGTTTCGCAAAGGGCGACGAATCTCTGGA  
GGACGAAGAGCGTTCTGGCCGCCCGTCCGAGGTTGACAACGACCAGCTGCGTG  
CAATCATCGAAGCTGATCCGCTGACTACCACCCGCGAAGTTGCTGAAGAAGTGA



ATGTGGATCACTCTACTGTGGTTCGCCACCTGAAACAGATCGGTAAAGTAAAA  
AACTGGACAAATGGGTTCCTCATGAACTGTCTGAAAACCAGAAAAACCGTCGTT  
TCGAAGTTAGCTCCTCTCTGATTCTGCGTAACAACAACGAACCGTTCCTGGATC  
GTATCGTAACCTGTGATGAGAAATGGATTCTGTATGATAACCGTCGCCGCTCTG  
CTCAGTGGCTGGATCGCGAAGAAGCTCCAAAACACTTCCCGAAACCGAATCTGC  
ACCAGAAGAAAGTCATGGTAACCGTATGGTGGTCTGCCGCAGGTGTTATCCACT  
ATTCCTTCCTGAACCCGGGCGAAACTATCACCAGCGAAAAATACTGCCAGCAGA  
TTGACGAAATGCACCGTAAACTGCAGCGTCTGCAGCCAGCACTGGTGAATCGTA  
AAGGTCCGATCCTGCTGCATGATAACGCCCGTCCGCACGTTGCCCAACCGACC  
CTGCAGAAACTGAACGAACTGGGCTATGAAGTTCTGCCACACCCGCCGTACTION  
CCGGATCTGTCCCGACTGACTACCATTTCTTCAAGCATCTGGACAACCTTCCTG  
CAGGGTAAACGTTTTTACAACCAACAGGACGCAGAAAACGCTTTCCAGGAGTTC  
GTCGAAAGCCGTTCCACTGACTTCTACGCGACCGGTATCAACAAGCTGATCAGC  
CGTTGGCAGAAATGCGTGGACTGTAACGGCAGCTACTTCGATTAAGACGTCTTA  
ATAACTAAAATATGGTATAATACTCTTAATAAATGCAGTAATACAGGGGCTTTTC  
AAGACTGAAGTCTAGCTGAGACAAATAGTGCGATTACGAAATTTTTTAGACAAAA  
ATAGTCTACGAGGTTTTAGAGCTATGCTGTTTTGAATGGTCCCAAACGGTTTTTC  
CCAGTCACGACGTTGTAAAACGAGTTTTAGAGCTATGCTGTTTTGAATGGTCCCA  
AACTTCAGCACACTGAGACTTGTTGAGTTCCATGTTTTAGAGCTATGCTGTTTT  
GAATGGACTCCATTCAACATTGCCGATGATAACTTGAGAAAGAGGGTTAATACC  
AGCAGTCGGATACCTTCCTATTCTTTCTGTTAAAGCGTTTTTCATGTTATAATAGG  
CAAAGAAGAGTAGTGTGATCGTCCATTCCGACAGCATCGCCAGTCACTATGGC  
GTGCTGCTAGCGCTATATGCGTTGATGCAATTTCTATGCGCACCCGTTCTCGGA  
GCACTGTCCGACCGCTTTGGCCGCCGCCAGTCCCTGCTCGCTTCGCTACTTGG  
AGCCACTATCGACTACGCGATCATGGCGACCACACCCGTCCTGTGGATCCTCTA  
CGCCGGACGCATCGTGGCCGGCATCACCGGCGCCACAGGTGCGGTTGCTGGC  
GCCTATATCGCCGACATCACCGATGGGGAAGATCGGGCTCGCCACTTCGGGCT  
CATGAGCGCTTGTTTTCGGCGTGGGTATGGTGGCAGGCCCCCGTGGCCGGGGGA  
CTGTTGGGCGCCATCTCCTTGCATGCACCATTCTTTCGCGGCGGCGGTGCTCAA  
CGGCCTCAACCTACTACTGGGCTGCTTCCTAATGCAGGAGTCGCATAAGGGAG  
AGCGTCGACCGATGCCCTTGAGAGCCTTCAACCCAGTCAGCTCCTTCCGGTGG  
GCGCGGGGCATGACTATCGTCGCCGCACTTATGACTGTCTTCTTTATCATGCAA  
CTCGTAGGACAGGTGCCGGCAGCGCTCTGGGTCATTTTCGGCGAGGACCGCTT  
TCGCTGGAGCGCGACGATGATCGGCCTGTCGCTTGCGGTATTCGGAATCTTGC  
ACGCCCTCGCTCAAGCCTTCGTCACTGGTCCCGCCACCAAACGTTTCGGCGAG  
AAGCAGGCCATTATCGCCGGCATGGCGGCCGACGCGCTGGGCTACGTCTTGCT  
GGCGTTCGCGACGCGAGGCTGGATGGCCTTCCCATTATGATTCTTCTCGCTTC  
CGGCGGCATCGGGATGCCCGCGTTGCAGGCCATGCTGTCCAGGCAGGTAGAT  
GACGACCATCAGGGACAGCTTCAAGGATCGCTCGCGGCTCTTACCAGCCTAAC  
TTCGATCATTGGACCGCTGATCGTCACGGCGATTTATGCCGCCTCGGCGAGCA  
CATGGAACGGGTTGGCATGGATTGTAGGCGCCGCCCTATACCTTGTCTGCCTC  
CCGCGGTTGCGTGCAGGTGCATGGAGCCGGGCCACCTCGACCTGAATGGAAG  
CCGGCGGCACCTCGCTAACGGATTCACCACTCCAAGAATTGGAGCCAATCAATT  
CTTGCGGAGAACTGTGAATGCGCAAACCAACCTTGGCAGAACATATCCATCGC

GTCCGCCATCTCCAGCAGCCGCACGCGGGCGCATCTCGGGCAGCGTTGGGTCT  
GGCCACGGGTGCGCATGATCGTGCTCCTGTGCTTGAGGACCCGGCTAGGCTGG  
CGGGGTTGCCCTTACTGGTTAGCAGAATGAATCACCGATACGCGAGCGAACGTG  
AAGCGACTGCTGCTGCAAACGTCTGCGACCTGAGCAACAACATGAATGGTCTT  
CGGTTTCCGTGTTTCGTAAAGTCTGGAAACGCGGAAGTCCCCTACGTGCTGCTG  
AAGTTGCCCGCAACAGAGAGTGGAACCAACCGGTGATACCACGATACTATGACT  
GAGAGTCAACGCCATGAGCGGCCTCATTTCTTATTCTGAGTTACAACAGTCCGC  
ACCGCTGTCCGGTAGCTCCTTCCGGTGGGCGCGGGGCATGACTATCGTCGCCG  
CACTTATGACTGTCTTCTTTATCATGCAACTCGTAGGACAGGTGCCGGCAGCGC  
CCAACAGTCCCCCGGCCACGGGGCCTGCCACCATACCACGCCGAAACAAGC  
GCCCTGCACCATTATGTTCCGGATCTGCATCGCAGGATGCTGCTGGCTACCCTG  
TGGAACACCTACATCTGTATTAACGAAGCGCTAACCGTTTTTATCAGGCTCTGG  
GAGGCAGAATAAATGATCATATCGTCAATTATTACCTCCACGGGGAGAGCCTGA  
GCAAACCTGGCCTCAGGCATTTGAGAAGCACACGGTCACACTGCTTCCGGTAGTC  
AATAAACCGGTAAACCAGCAATAGACATAAGCGGCTATTTAACGACCCTGCCCT  
GAACCGACGACCGGGTCAATTTGCTTTCAATTTCTGCCATTCATCCGCTTATT  
ATCACTTATTCAGGCGTAGCACCAGGCGTTTAAAGGGCACCAATAACTGCCTTAA  
AAAAATTACGCCCCGCCCTGCCACTCATCGCAGTACTGTTGTAATTCATTAAGCA  
TTCTGCCGACATGGAAGCCATCACAGACGGCATGATGAACCTGAATCGCCAGC  
GGCATCAGCACCTTGTCGCCTTGCGTATAATATTTGCCCATGGTGAAAACGGGG  
GCGAAGAAGTTGTCCATATTGGCCACGTTTAAATCAAACCTGGTGAAACTCACC  
CAGGGATTGGCTGAGACGAAAAACATATTCTCAATAAACCTTTAGGGAAATAG  
GCCAGGTTTTACCGTAACACGCCACATCTTGCGAATATATGTGTAGAACTGC  
CGGAAATCGTCGTGGTATTCACTCCAGAGCGATGAAAACGTTTCAGTTTGCTCA  
TGGAACCGGTGTAACAAGGGTGAACACTATCCCATATCACCAGCTCACCCTCT  
TTCATTGCCATACG

pRC2306

GAATTCGGATGAGCATTATCAGGCGGGCAAGAATGTGAATAAAGGCCGGAT  
AAAACCTTGCTTATTTTTCTTTACGGTCTTTAAAAGGCCGTAATATCCAGCTGA  
ACGGTCTGGTTATAGGTACATTGAGCAACTGACTGAAATGCCTCAAATGTTCTT  
TACGATGCCATTGGGATATATCAACGGTGGTATATCCAGTGATTTTTTTCTCCAT  
TTTAGCTTCCTTAGCTCCTGAAAATCTCGATAACTCAAAAAATACGCCCGGTAGT  
GATCTTATTTCAATTATGGTGAAAGTTGGAACCTCTTACGTGCCGATCAACGTCTC  
ATTTTCGCCAAAAGTTGGCCCAGGGCTTCCCGGTATCAACAGGGACACCAGGAT  
TTATTTATTCTGCGAAGTGATCTTCCGTCACAGGTATTTATTCGGCGCAAAGTGC  
GTCGGGTGATGCTGCCAACTTACTGATTTAGTGTATGATGGTGTTTTTGAGGTG  
CTCCAGTGGCTTCTGTTTCTATCAGCTGTCCCTCCTGTTTCAGCTACTGACGGGG  
TGGTGCGTAACGGCAAAGCACCGCCGGACATCAGCGCTAGCGGAGTGATAC  
TGGCTTACTATGTTGGCACTGATGAGGGTGTGAGTGAAGTGCTTCATGTGGCAG  
GAGAAAAAAGGCTGCACCGGTGCGTCAGCAGAATATGTGATACAGGATATATTC  
CGCTTCCTCGCTCACTGACTCGCTACGCTCGGTGCTTCGACTGCGGCGAGCGG  
AAATGGCTTACGAACGGGGCGGAGATTTCTGGAAGATGCCAGGAAGATACTTA

ACAGGGAAGTGAGAGGGCCGCGGCAAAGCCGTTTTTCCATAGGCTCCGCCCC  
CTGACAAGCATCACGAAATCTGACGCTCAAATCAGTGGTGGCGAAACCCGACA  
GGACTATAAAGATACCAGGCGTTTCCCCTGGCGGCTCCCTCGTGCCTCTCT  
GTTCTGCTTTTCGTTTTACCGGTGTCATTCCGCTGTTATGGCCGCGTTTGTCT  
CATTCCACGCCTGACACTCAGTTCGGGTAGGCAGTTCGCTCCAAGCTGGACT  
GTATGCACGAACCCCCGTTTCCAGTCCGACCGCTGCGCCTTATCCGGTAACTATC  
GTCTTGAGTCCAACCCGAAAGACATGCAAAGCACCACTGGCAGCAGCCACT  
GGTAATTGATTTAGAGGAGTTAGTCTTGAAGTCATGCGCCGGTTAAGGCTAAAC  
TGAAAGGACAAGTTTTGGTGACTGCGCTCCTCCAAGCCAGTTACCTCGGTTCAA  
AGAGTTGGTAGCTCAGAGAACCCTTCGAAAACCGCCCTGCAAGGCGGTTTTTTC  
GTTTTCAGAGCAAGAGATTACGCGCAGACCAAACGATCTCAAGAAGATCATCT  
TATTAATCAGATAAAATATTTCTAGATTTTCAAGTGCATTTTATCTCTTCAAATGTAG  
CACCTGAAGTCAGCCCCATACGATATAAGTTGTAATTCTCATGTTTGACAGCTTA  
TCATCGATAAGCTTTAATGCGGTAGTTTATCACAGTTAAATTGCTAACGCAGTCA  
GGCACCGTGTATGAAATCTAACAATGCGCTCATCGTCATCCTCGGCACCGTCAC  
CCTGGATGCTGTAGGCATAGGCTTGGTTATGCCGGTACTGCCGGGCCTCTTGC  
GGGATTACGAAATCATCCTGTGGAGCTTAGTAGGTTTAGCAAGATGGCAGCGCC  
TAAATGTAGAATGATAAAAGGATTAAGAGATTAATTTCCCTAAAATGATAAAACA  
AGCGTTTTGAAAGCGCTTGTTTTTTTGGTTTGCAGTCAGAGTAGAATAGAAGTAT  
CAAAAAAGCACCGACTCGGTGCCACTTTTTCAAGTTGATAACGGACTAGCCTT  
ATTTAACTTGCTATGCTGTTTTGAATGGTTCCAACAAGATTATTTTATAACTTTTA  
TAACAATAATCAAGGAGAAATTCAAAGAAATTTATCAGCCATAAAACAATACTTA  
ATACTATAGAATGATAACAAAATAAACTACTTTTTAAAAGAATTTTGTGTTATAATC  
TATTTATTATTAAGTATTGGGTAATATTTTTTTGAAGAGATATTTTGAAAAAGAAAA  
TTAAAGCATATTAACCTAATTTTCGGAGGTCATTAAACTATTATTGAAATCATCAA  
ACTCATTATGGATTTAATTTAACTTTTTATTTTAGGAGGCAACATATGGAAATGA  
TGCTCGATAAGAAACAGATTCGTGCGATCTTCTCTTTGAGTTTAAAATGGGTCG  
CAAAGCGGCGGAGACGACGCGTAATATTAACAACGCGTTCGGTCTGACCG  
CGAACGAGCGTACCGTGCAATGGTGGTTCAAAAAGTTTCGCAAAGGCGACGAA  
TCTCTGGAGGACGAAGAGCGTTCTGGCCGCCGTCCGAGGTTGACAACGACCA  
GCTGCGTGCAATCATCGAAGCTGATCCGCTGACTACCACCCGCGAAGTTGCTG  
AAGAACTGAATGTGGATCACTCTACTGTGGTTCGCCACCTGAAACAGATCGGTA  
AAGTAAAAAACTGGACAAATGGGTTCTCATGAACTGTCTGAAAACCAGAAAA  
CCGTCGTTTTCGAAGTTAGCTCCTCTCTGATTCTGCGTAACAACAACGAACCGTT  
CCTGGATCGTATCGTAACCTGTGATGAGAAATGGATTCTGTATGATAACCGTCG  
CCGCTCTGCTCAGTGGCTGGATCGCGAAGAAGCTCCAAAACACTTCCCGAAAC  
CGAATCTGCACCAGAAGAAAGTCATGGTAACCGTATGGTGGTCTGCCGCAGGT  
GTTATCCACTATTCCTTCTGAACCCGGGCGAAACTATCACCAGCGAAAAATACT  
GCCAGCAGATTGACGAAATGCACCGTAACTGCAGCGTCTGCAGCCAGCACTG  
GTGAATCGTAAAGGTCGATCCTGCTGCATGATAACGCCCGTCCGCACGTTGCC  
CAACCGACCCTGCAGAACTGAACGAACCTGGGCTATGAAGTTCTGCCACACCC  
GCCGTACTCCCCGGATCTGTCCCCGACTGACTACCATTTCTTCAAGCATCTGGA  
CAACTTCTGCAGGGTAAACGTTTTTCAACAACCAACAGGACGCAGAAAACGCTTT  
CCAGGAGTTCGTGCAAAGCCGTTCCACTGACTTCTACGCGACCGGTATCAACAA

GCTGATCAGCCGTTGGCAGAAATGCGTGGACTGTAACGGCAGCTACTTCGATTA  
AGGATCCTCTAGAGTCGACCGATGCCCTTGAGAGCCTTCAACCCAGTCAGCTCC  
TTCCGGTGGGCGCGGGGCATGACTATCGTCGCCGCACTTATGACTGTCTTCTTT  
ATCATGCAACTCGTAGGACAGGTGCCGGCAGCGCTCTGGGTCAATTTTCGGCGA  
GGACCGCTTTCGCTGGAGCGCGACGATGATCGGCCTGTCGCTTGCGGTATTGCG  
GAATCTTGACGCCCTCGCTCAAGCCTTCGTCACTGGTCCCGCCACCAAACGTT  
TCGGCGAGAAGCAGGCCATTATCGCCGGCATGGCGGCCGACGCGCTGGGCTA  
CGTCTTGCTGGCGTTCGCGACGCGAGGCTGGATGGCCTTCCCCATTATGATTCT  
TCTCGCTTCCGGCGGCATCGGGATGCCCGCGTTGCAGGCCATGCTGTCCAGGC  
AGGTAGATGACGACCATCAGGGACAGCTTCAAGGATCGCTCGCGGCTCTTACC  
AGCCTAACTTCGATCATTGGACCGCTGATCGTCACGGCGATTTATGCCGCCTCG  
GCGAGCACATGGAACGGGTGGCATGGATTGTAGGCGCCGCCCTATACCTTGT  
CTGCCTCCCCGCGTTGCGTCGCGGTGCATGGAGCCGGGCCACCTCGACCTGAA  
TGGAAGCCGGCGGCACCTCGCTAACGGATTCACTCCAAGAATTGGAGCCA  
ATCAATTCTTGGGAGAAGTGTGAATGCGCAAACCAACCCTTGGCAGAACATAT  
CCATCGCGTCCGCCATCTCCAGCAGCCGCACGCGGCATCTCGGGCAGCGTT  
GGGTCTTGGCCACGGGTGCGCATGATCGTGCTCCTGTGCTTGGAGACCCGGCT  
AGGCTGGCGGGGTTGCCTTACTGGTTAGCAGAATGAATCACCGATACGCGAGC  
GAACGTGAAGCGACTGCTGCTGCAAAACGTCTGCGACCTGAGCAACAACATGA  
ATGGTCTTCGGTTTCCGTGTTTCGTAAAGTCTGGAAACGCGGAAGTCCCCTACG  
TGCTGCTGAAGTTGCCCGAACAGAGAGTGGAAACCAACCGGTGATACCACGAT  
ACTATGACTGAGAGTCAACGCCATGAGCGGCCTCATTCTTATTCTGAGTTACAA  
CAGTCCGCACCGCTGTCCGGTAGCTCCTTCCGGTGGGCGCGGGGCATGACTAT  
CGTCGCCGCACTTATGACTGTCTTCTTTATCATGCAACTCGTAGGACAGGTGCC  
GGCAGCGCCCAACAGTCCCCCGGCCACGGGGCCTGCCACCATACCCACGCCG  
AAACAAGCGCCCTGCACCATTATGTTCCGGATCTGCATCGCAGGATGCTGCTGG  
CTACCCTGTGGAACACCTACATCTGTATTAACGAAGCGCTAACCGTTTTTATCAG  
GCTCTGGGAGGCAGAATAAATGATCATATCGTCAATTATTACCTCCACGGGGAG  
AGCCTGAGCAAACCTGGCCTCAGGCATTTGAGAAGCACACGGTCACACTGCTTCC  
GGTAGTCAATAAACCGGTAAACCAGCAATAGACATAAGCGGCTATTTAACGACC  
CTGCCCTGAACCGACGACCGGGTCGAATTTGCTTTTGAATTTCTGCCATTCATC  
CGCTTATTATCACTTATTCAGGCGTAGCACCAGGCGTTTAAGGGCACCAATAAC  
TGCCTTAAAAAATTACGCCCCGCCCTGCCACTCATCGCAGTACTGTTGTAATTC  
ATTAAGCATTCTGCCGACATGGAAGCCATCACAGACGGCATGATGAACCTGAAT  
CGCCAGCGGCATCAGCACCTTGTGCGCTTGCATATAATATTTGCCCATGGTGAA  
AACGGGGGCGAAGAAGTTGTCCATATTGGCCACGTTTAAATCAAACCTGGTGAA  
ACTACCCAGGGATTGGCTGAGACGAAAACATATTCTCAATAAACCCTTTAGG  
GAAATAGGCCAGGTTTTACCGTAACACGCCACATCTTGCGAATATATGTGTAG  
AAACTGCCGGAAATCGTCGTGGTATTCCTCCAGAGCGATGAAAACGTTTCAGT  
TTGCTCATGGAAAACGGTGTAACAAGGGTGAACACTATCCCATATCACCCAGCTC  
ACCGTCTTTCATTGCCATACG

GAATTCCGGATGAGCATTTCATCAGGCGGGCAAGAATGTGAATAAAGGCCGGAT  
AAAAC TTGTGCTTATTTTTCTTTACGGTCTTTAAAAAGGCCGTAATATCCAGCTGA  
ACGGTCTGGTTATAGGTACATTGAGCAACTGACTGAAATGCCTCAAAATGTTCTT  
TACGATGCCATTGGGATATATCAACGGTGGTATATCCAGTGATTTTTTTCTCCAT  
TTAGCTTCCTTAGCTCCTGAAAATCTCGATAACTCAAAAAATACGCCCGGTAGT  
GATCTTATTTTATTATGGTGAAAGTTGGAACCTCTTACGTGCCGATCAACGTCTC  
ATTTTCGCCAAAAGTTGGCCCAGGGCTTCCCGGTATCAACAGGGACACCAGGAT  
TTATTTATTCTGCGAAGTGATCTTCCGTACAGGTATTTATTTCGGCGCAAAGTGC  
GTCGGGTGATGCTGCCAACTTACTGATTTAGTGTATGATGGTGTTTTTGAGGTG  
CTCCAGTGGCTTCTGTTTTCTATCAGCTGTCCCTCCTGTTTCAGCTACTGACGGGG  
TGGTGCGTAACGGCAAAGCACCGCCGGACATCAGCGCTAGCGGAGTGTATAC  
TGGCTTACTATGTTGGCACTGATGAGGGTGTGAGTGAAGTGCTTCATGTGGCAG  
GAGAAAAAGGCTGCACCGGTGCGTCAGCAGAATATGTGATACAGGATATATTC  
CGCTTCCTCGCTCACTGACTCGCTACGCTCGGTCTGTTTCGACTGCGGCGAGCGG  
AAATGGCTTACGAACGGGGCGGAGATTTCTGGAAGATGCCAGGAAGATACTTA  
ACAGGGAAGTGAGAGGGCCGCGCAAAGCCGTTTTTCCATAGGCTCCGCCCCC  
CTGACAAGCATCACGAAATCTGACGCTCAAATCAGTGGTGGCGAAACCCGACA  
GGACTATAAAGATACCAGGCGTTTTCCCCTGGCGGCTCCCTCGTGCGCTCTCCT  
GTTCTGCTTTTCGGTTTACCGGTGTCATTCCGCTGTTATGGCCGCGTTTGTCT  
CATTCCACGCCTGACACTCAGTTCGGGGTAGGCAGTTCGCTCCAAGCTGGACT  
GTATGCACGAACCCCCCGTTCAGTCCGACCGCTGCGCCTTATCCGGTAACATC  
GTCTTGAGTCCAACCCGGAAAGACATGCAAAGCACCACTGGCAGCAGCCACT  
GGTAATTGATTTAGAGGAGTTAGTCTTGAAGTCATGCGCCGGTTAAGGCTAAAC  
TGAAAGGACAAGTTTTGGTGACTGCGCTCCTCCAAGCCAGTTACCTCGGTTCAA  
AGAGTTGGTAGCTCAGAGAACCTTCGAAAAACCGCCCTGCAAGGCGGTTTTTTC  
GTTTTCAGAGCAAGAGATTACGCGCAGACCAAACGATCTCAAGAAGATCATCT  
TATTAATCAGATAAAATATTTCTAGATTTTCAGTGCAATTTATCTCTTCAAATGTAG  
CACCTGAAGTCAGCCCCATACGATATAAGTTGTAATTCTCATGTTTGACAGCTTA  
TCATCGATAAGCTTTAATGCGGTAGTTTATCACAGTTAAATTGCTAACGCAGTCA  
GGCACCGTGTATGAAATCTAACAAATGCGCTCATCGTCATCCTCGGCACCGTCAC  
CCTGGATGCTGTAGGCATAGGCTTGGTTATGCCGGTACTGCCGGGCTCTTGC  
GGGATTACGAAATCATCCTGTGGAGCTTAGTAGGTTTAGCAAGATGGCAGCGCC  
TAAATGTAGAATGATAAAAGGATTAAGAGATTAATTTCCCTAAAAATGATAAAACA  
AGCGTTTTGAAAGCGCTTGTTTTTTTGGTTTGCAGTCAGAGTAGAATAGAAGTAT  
CAAAAAAAGCACCGACTCGGTGCCACTTTTTCAAGTTGATAACGGACTAGCCTT  
ATTTAACTTGCTATGCTGTTTTGAATGGTTCCAACAAGATTATTTTATAACTTTTA  
TAACAAATAATCAAGGAGAAATTCAAAGAAATTTATCAGCCATAAAACAATACTTA  
ATACTATAGAATGATAACAAAATAAACTACTTTTTAAAAGAATTTTGTGTTATAATC  
TATTTATTATTAAGTATTGGGTAATATTTTTTGAAGAGCGGCCGCGCACGATCTC  
GACACTCGAGATGGATAAGAAATACTCAATAGGCTTAGCTATCGGCACAAATAG  
CGTCGGATGGGCGGTGATCACTGATGAATATAAGGTTCCGTCTAAAAAGTTCAA  
GGTTCTGGGAAATACAGACCGCCACAGTATCAAAAAAATCTTATAGGGGCTCT  
TTTATTTGACAGTGGAGAGACAGCGGAAGCGACTCGTCTCAAACGGACAGCTC  
GTAGAAGGTATACACGTCCGAAGAATCGTATTTGTTATCTACAGGAGATTTTTTC

AAATGAGATGGCGAAAGTAGATGATAGTTTCTTTCATCGACTTGAAGAGTCTTTT  
TTGGTGGAGAAGACAAGAAGCATGAACGTCATCCTATTTTTGGAAATATAGTAG  
ATGAAGTTGCTTATCATGAGAAATATCCAACCTATCTATCATCTGCGAAAAAATT  
GGTAGATTCTACTGATAAAGCGGATTTGCGCTTAATCTATTTGGCCTTAGCGCAT  
ATGATTAAGTTTCGTGGTCATTTTTGATTGAGGGAGATTTAAATCCTGATAATAG  
TGATGTGGACAACTATTTATCCAGTTGGTACAAACCTACAATCAATTATTTGAA  
GAAAACCCTATTAACGCAAGTGGAGTAGATGCTAAAGCGATTCTTTCTGCACGA  
TTGAGTAAATCAAGACGATTAGAAAATCTCATTGCTCAGCTCCCCGGTGAGAAG  
AAAAATGGCTTATTTGGGAATCTCATTGCTTTGTCATTGGGTTTGACCCCTAATT  
TTAAATCAAATTTTGATTTGGCAGAAGATGCTAAATTACAGCTTTCAAAGATACT  
TACGATGATGATTTAGATAATTTATTGGCGCAAATTGGAGATCAATATGCTGATT  
TGTTTTTGGCAGCTAAGAATTTATCAGATGCTATTTTACTTTTACAGATATCCTAAGA  
GTAAATACTGAAATAACTAAGGCTCCCCTATCAGCTTCAATGATTAACGCTACG  
ATGAACATCATCAAGACTTGACTCTTTTAAAAGCTTTAGTTTCGACAACAACCTCC  
AGAAAAGTATAAAGAAATCTTTTTGATCAATCAAAAACGGATATGCAGGTTAT  
ATTGATGGGGGAGCTAGCCAAGAAGAATTTTATAAATTTATCAAACCAATTTTAG  
AAAAATGGATGGTACTGAGGAATTATTGGTGAAACTAAATCGTGAAGATTTGCT  
GCGCAAGCAACGGACCTTTGACAACGGCTCTATTCCCCATCAAATCACTTGGG  
TGAGCTGCATGCTATTTTGAGAAGACAAGAAGACTTTTATCCATTTTTAAAAGAC  
AATCGTGAGAAGATTGAAAAAATCTTGACTTTTCGAATTCCTTATTATGTTGGTCC  
ATTGGCGCGTGGAATAGTCGTTTTGCATGGATGACTCGGAAGTCTGAAGAAAC  
AATTACCCCATGGAATTTGAAGAAGTTGTGATAAAGGTGCTTCAGCTCAATCA  
TTTATTGAACGCATGACAACTTTGATAAAAATCTTCCAATGAAAAAGTACTACC  
AAACATAGTTTGCTTTATGAGTATTTTACGGTTTATAACGAATTGACAAAGGTCA  
AATATGTTACTGAAGGAATGCGAAAACCAGCATTCTTTTCCAGGTGAACAGAAGAA  
AGCCATTGTTGATTTACTCTTCAAACAATCGAAAAGTAACCGTTAAGCAATTA  
AAAGAAGATTATTTCAAAAAAATAGAATGTTTTGATAGTGTTGAAATTTTCAGGAGT  
TGAAGATAGATTTAATGCTTCATTAGGTACCTACCATGATTTGCTAAAAATTATTA  
AAGATAAAGATTTTTTGGATAATGAAGAAAATGAAGATATCTTAGAGGATATTGTT  
TTAACATTGACCTTATTTGAAGATAGGGAGATGATTGAGGAAAGACTTAAACAT  
ATGCTCACCTCTTTGATGATAAGGTGATGAAACAGCTTAAACGTCGCCGTTATAC  
TGGTTGGGGACGTTTGTCTCGAAAATTGATTAATGGTATTAGGGATAAGCAATCT  
GGCAAAACAATATTAGATTTTTTGAATCAGATGGTTTTGCCAATCGCAATTTTAT  
GCAGCTGATCCATGATGATAGTTTGACATTTAAAGAAGACATTCAAAAAGCACAA  
GTGTCTGGACAAGGCGATAGTTTACATGAACATATTGCAAATTTAGCTGGTAGC  
CCTGCTATTA AAAAAGGTATTTTACAGACTGTAAAAGTTGTTGATGAATTGGTCA  
AAGTAATGGGGCGGCATAAGCCAGAAAATATCGTTATTGAAATGGCACGTGAAA  
ATCAGACAACCTCAAAGGGCCAGAAAATTCGCGAGAGCGTATGAAACGAATCG  
AAGAAGGTATCAAAGAATTAGGAAGTCAGATTCTTAAAGAGCATCCTGTTGAAAA  
TACTCAATTGCAAATGAAAAGCTCTATCTCTATTATCTCCAAAATGGAAGAGAC  
ATGTATGTGGACCAAGAATTAGATATTAATCGTTTAAAGTGATTATGATGTCGATG  
CCATTGTTCCACAAAGTTTCCTTAAAGACGATTCAATAGACAATAAGGTCTTAAC  
GCGTTCTGATAAAAATCGTGGTAAATCGGATAACGTTCCAAGTGAAGAAGTAGT  
CAAAAAGATGAAAACTATTGGAGACAACCTTCTAAACGCCAAGTTAATCACTCAA

CGTAAGTTTGATAATTTAACGAAAGCTGAACGTGGAGGTTTGAGTGAACCTTGATA  
AAGCTGGTTTTATCAAACGCCAATTGGTTGAAACTCGCCAAATCACTAAGCATGT  
GGCACAAATTTTGGATAGTCGCATGAATACTAAATACGATGAAAATGATAAACTT  
ATTCGAGAGGTTAAAGTGATTACCTTAAAATCTAAATTAGTTTCTGACTTCCGAAA  
AGATTTCCAATTCTATAAAGTACGTGAGATTAACAATTACCATCATGCCCATGAT  
GCGTATCTAAATGCCGTCGTTGGAAGCTGCTTTGATTAAGAAATATCCAAAACCTTG  
AATCGGAGTTTGTCTATGGTGATTATAAAGTTTATGATGTTTCGTA AAAATGATTGCT  
AAGTCTGAGCAAGAAATAGGCAAAGCAACCGCAAATATTTCTTTTACTCTAATA  
TCATGAACTTCTTCAAACAGAAATTACACTTGCAAATGGAGAGATTTCGCAAACG  
CCCTCTAATCGAAACTAATGGGGAAACTGGAGAAATTGTCTGGGATAAAGGGCG  
AGATTTTGCCACAGTGC GCAAAGTATTGTCCATGCCCAAGTCAATATTGTCAAG  
AAACAGAAGTACAGACAGGCGGATTCTCCAAGGAGTCAATTTTACCAAAAAGA  
AATTCGGACAAGCTTATTGCTCGTAAAAAAGACTGGGATCCAAAAAATATGGTG  
GTTTTGATAGTCCAACGGTAGCTTATT CAGTCCTAGTGGTTGCTAAGGTGGAAAA  
AGGGAAATCGAAGAAGTTAAATCCGTTAAAGAGTTACTAGGGATCACAATTATG  
GAAAGAAGTTCCTTTGAAAAAATCCGATTGACTTTTTAGAAAGCTAAAGGATATA  
AGGAAGTTAAAAAAGACTTAATCATTAAACTACCTAAATATAGTCTTTTTGAGTTA  
GAAAACGGTCGTAAACGGATGCTGGCTAGTGCCGGAGAATTACAAAAGGAAAT  
GAGCTGGCTCTGCCAAGCAAATATGTGAATTTTTTATATTTAGCTAGTCATTATG  
AAAAGTTGAAGGGTAGTCCAGAAGATAACGAACAAAAACAATTGTTTGTGGAGC  
AGCATAAGCATTATTTAGATGAGATTATTGAGCAAATCAGTGAATTTTCTAAGCG  
TGTTATTTTAGCAGATGCCAATTTAGATAAAGTTCTTAGTGCATATAACAAACATA  
GAGACAAACCAATACGTGAACAAGCAGAAAATATTATTCATTTATTTACGTTGAC  
GAATCTTGGAGCTCCCGCTGCTTTTAAATATTTTGATACAACAATTGATCGTAAA  
CGATATACGTCTACAAAAGAAGTTTTAGATGCCACTCTTATCCATCAATCCATCA  
CTGGTCTTTATGAAACACGCATTGATTTGAGTCAGCTAGGAGGTCCTAGGGGAG  
GTGGCTCAGAAGGTGGCGGATCTGAAGGTGGCTCTGGAactagtATGAGCGATAA  
AATTATTCACCTGACTGACGACAGTTTTGACACGGATGTA CTCAAAGCGGACGG  
GGCGATCCTCGTCGATTTCTGGGCAGAGTGGTGCGGTCCGTGCAAATGATCG  
CCCCGATTCTGGATGAAATCGCTGACGAATATCAGGGCAA ACTGACCGTTGCAA  
AACTGAACATCGATCAAACCCTGGCACTGCGCCGAAATATGGCATCCGTGGTA  
TCCCGACTCTGCTGCTGTTCAAAAACGGTGAAGTGGCGGCAACCAAAGTGGGT  
GCACTGTCTAAAGGTCAGTTGAAAGAGTTCCTCGACGCTAACCTGGCCGTTCT  
GGTTCTGGCCATATGCACCATCATCATCATTCTTCTGGTCTGGTGCCACGC  
GGTTCTGGTATGAAAGAAACCGCTGCTGCTAAATTCGAACGCCAGCACATGGAC  
AGCCCAGATCTGGGTACCGACGACGACGACAAGGCCATGGCTGATATCggatccC  
ATATGGAAATGATGCTCGATAAGAAACAGATTCGTGCGATCTTCTCTTTGAGTT  
TAAAATGGGTCGCAAAGCGGCGGAGACGACGCGTAATATTAACAACGCGTTCCG  
GTCCTGGCACCGCGAACGAGCGTACCGTGCAATGGTGGTTCAAAAAGTTTCGC  
AAAGGCGACGAATCTCTGGAGGACGAAGAGCGTTCTGGCCGCCCGTCCGAGGT  
TGACAACGACCAGCTGCGTGCAATCATCGAAGCTGATCCGCTGACTACCACCC  
GCGAAGTTGCTGAAGA ACTGAATGTGGATCACTCTACTGTGGTTCGCCACCTGA  
AACAGATCGGTAAAGTAAAAAACTGGACAAATGGGTTCTCATGAACTGTCTG  
AAAACCAGAAAACCGTCGTTTCGAAGTTAGCTCCTCTCTGATTCTGCGTAACAA

CAACGAACCGTTCCTGGATCGTATCGTAACCTGTGATGAGAAATGGATTCTGTA  
TGATAACCGTCGCCGCTCTGCTCAGTGGCTGGATCGCGAAGAAGCTCCAAAAC  
ACTTCCCGAAACCGAATCTGCACCAGAAGAAAGTCATGGTAACCGTATGGTGGT  
CTGCCGCAGGTGTTATCCACTATTCCTTCCTGAACCCGGGCGAAACTATCACCA  
GCGAAAAATACTGCCAGCAGATTGACGAAATGCACCGTAAACTGCAGCGTCTGC  
AGCCAGCACTGGTGAATCGTAAAGGTCCGATCCTGCTGCATGATAACGCCCGTC  
CGCACGTTGCCCAACCGACCCTGCAGAACTGAACGAACCTGGGCTATGAAGTT  
CTGCCACACCCGCCGTACTIONCCCGGATCTGTCCCGACTGACTACCATTCTTC  
AAGCATCTGGACAACCTCCTGCAGGGTAAACGTTTTTCACAACCAACAGGACGCA  
GAAAACGCTTTCAGGAGTTCGTGCGAAAGCCGTTCCACTGACTTCTACGCGACC  
GGTATCAACAAGCTGATCAGCCGTTGGCAGAAATGCGTGGACTGTAACGGCAG  
CTACTTCGATTAAGACGTCTTAATAACTAAAATATGGTATAATACTCTTAATAAA  
TGCAGTAATACAGGGGCTTTTTCAAGACTGAAGTCTAGCTGAGACAAATAGTGCG  
ATTACGAAATTTTTTAGACAAAAATAGTCTACGAGGTTTTAGAGCTATGCTGTTTT  
GAATGGTCCCAAACGGTTTTCCAGTCACGACGTTGTAAAACGAGTTTTAGAG  
CTATGCTGTTTTGAATGGTCCCAAACCTCAGCACACTGAGACTTGTTGAGTTCC  
ATGTTTTAGAGCTATGCTGTTTTGAATGGACTCCATTCAACATTGCCGATGATAA  
CTTGAGAAAGAGGGTTAATACCAGCAGTCGGATACCTTCCTATTCTTTCTGTAA  
AGCGTTTTCATGTTATAATAGGCAAAGAAGAGTAGTGTGATCGTCCATTCCGAC  
AGCATCGCCAGTCACTATGGCGTGCTGCTAGCGCTATATGCGTTGATGCAATTT  
CTATGCGCACCCGTTCTCGGAGCACTGTCCGACCGCTTTGGCCGCCGCCAGT  
CCTGCTCGCTTCGCTACTTGGAGCCACTATCGACTACGCGATCATGGCGACCAC  
ACCCGTCCTGTGGATCCTCTACGCCGGACGCATCGTGGCCGGCATCACCGGCG  
CCACAGGTGCGGTTGCTGGCGCCTATATCGCCGACATCACCGATGGGGAAGAT  
CGGGCTCGCCACTTCGGGCTCATGAGCGCTTGTTTCGGCGTGGGTATGGTGGC  
AGGCCCCGTGGCCGGGGGACTGTTGGGCGCCATCTCCTTGCATGCACCATTCC  
TTGCGGCGGCGGTGCTCAACGGCCTCAACCTACTACTGGGCTGCTTCCTAATG  
CAGGAGTCGCATAAGGGAGAGCGTCGACCGATGCCCTTGAGAGCCTTCAACCC  
AGTCAGCTCCTTCCGGTGGGCGCGGGGCATGACTATCGTCGCCGCACTTATGA  
CTGTCTTCTTTATCATGCAACTCGTAGGACAGGTGCCGGCAGCGCTCTGGGTCA  
TTTTCGGCGAGGACCGCTTTCGCTGGAGCGCGACGATGATCGGCCTGTGCTT  
GCGGTATTCGGAATCTTGCACGCCCTCGCTCAAGCCTTCGTCACTGGTCCCGC  
CACCAAACGTTTCGGCGAGAAGCAGGCCATTATCGCCGGCATGGCGGCCGACG  
CGCTGGGCTACGTCTTGCTGGCGTTCGCGACGCGAGGCTGGATGGCCTTCCCC  
ATTATGATTCTTCTCGCTTCGGCGGCATCGGGATGCCCGCGTTGCAGGCCATG  
CTGTCCAGGCAGGTAGATGACGACCATCAGGGACAGCTTCAAGGATCGCTCGC  
GGCTCTTACCAGCCTAACTTCGATCATTGGACCGCTGATCGTCACGGCGATTTA  
TGCCGCCTCGGCGAGCACATGGAACGGGTTGGCATGGATTGTAGGCGCCGCC  
CTATACCTTGTCTGCCTCCCCGCGTTGCGTCGCGGTGCATGGAGCCGGGCCAC  
CTCGACCTGAATGGAAGCCGGCGGCACCTCGCTAACGGATTCACCACTCCAAG  
AATTGGAGCCAATCAATTCTTGCGGAGAAGTGTGAATGCGCAAACCAACCCTTG  
GCAGAACATATCCATCGCGTCCGCCATCTCCAGCAGCCGCACGCGGGCGCATCT  
CGGGCAGCGTTGGGTCCTGGCCACGGGTGCGCATGATCGTGCCTCCTGTGCTTG  
AGGACCCGGCTAGGCTGGCGGGGTTGCCTTACTGGTTAGCAGAATGAATCACC



GATACGCGAGCGAACGTGAAGCGACTGCTGCTGCAAAACGTCTGCGACCTGAG  
CAACAACATGAATGGTCTTCGGTTTCCGTGTTTCGTAAAGTCTGGAAACGCGGA  
AGTCCCCTACGTGCTGCTGAAGTTGCCCGCAACAGAGAGTGGAAACCAACCGGT  
GATACCACGATACTATGACTGAGAGTCAACGCCATGAGCGGCCTCATTCTTAT  
TCTGAGTTACAACAGTCCGCACCGCTGTCCGGTAGCTCCTTCCGGTGGGCGCG  
GGGCATGACTATCGTCGCCGCACTTATGACTGTCTTCTTTATCATGCAACTCGTA  
GGACAGGTGCCGGCAGCGCCCAACAGTCCCCCGGCCACGGGGCCTGCCACCA  
TACCCACGCCGAAACAAGCGCCCTGCACCATTATGTTCCGGATCTGCATCGCAG  
GATGCTGCTGGCTACCCTGTGGAACACCTACATCTGTATTAACGAAGCGCTAAC  
CGTTTTTATCAGGCTCTGGGAGGCAGAATAAATGATCATATCGTCAATTATTACC  
TCCACGGGGAGAGCCTGAGCAAACCTGGCCTCAGGCATTTGAGAAGCACACGGT  
CACACTGCTTCCGGTAGTCAATAAACCGGTAAACCAGCAATAGACATAAGCGGC  
TATTTAACGACCCTGCCCTGAACCGACGACCGGGTTCGAATTTGCTTTCGAATTT  
CTGCCATTATCCGCTTATTATCACTTATTCAGGCGTAGCACCAGGCGTTTAAGG  
GCACCAATAACTGCCTTAAAAAATTACGCCCCGCCCTGCCACTCATCGCAGTA  
CTGTTGTAATTCATTAAGCATTCTGCCGACATGGAAGCCATCACAGACGGCATG  
ATGAACCTGAATCGCCAGCGGCATCAGCACCTTGTGCGCCTTGGGTATAATTTT  
GCCCATGGTGAAAACGGGGGCGAAGAAGTTGCCATATTGGCCACGTTTAAATC  
AAAACCTGGTGAAACTCACCCAGGGATTGGCTGAGACGAAAACATATTCTCAAT  
AAACCCTTTAGGGAAATAGGCCAGGTTTTCCCGTAACACGCCACATCTTGCGA  
ATATATGTGTAGAAACTGCCGGAAATCGTCGTGGTATTCACTCCAGAGCGATGA  
AAACGTTTTCAGTTTGGCTCATGGAAAACGGTGTAACAAGGGTGAACACTATCCCA  
TATCACCAGCTCACCGTCTTTCATTGCCATACG

pRC2308

GAATTCGGATGAGCATTATCAGGCGGGCAAGAATGTGAATAAAGGCCGGAT  
AAAACCTTGTGCTTATTTTTCTTACGGTCTTTAAAAGGCCGTAATATCCAGCTGA  
ACGGTCTGGTTATAGGTACATTGAGCAACTGACTGAAATGCCTCAAATGTTCTT  
TACGATGCCATTGGGATATATCAACGGTGGTATATCCAGTGATTTTTTTCTCCAT  
TTTAGCTTCCTTAGCTCCTGAAAATCTCGATAACTCAAAAATACGCCCGGTAGT  
GATCTTATTTTATTATGGTGAAAGTTGGAACCTCTTACGTGCCGATCAACGTCTC  
ATTTTCGCCAAAAGTTGGCCCAGGGCTTCCCGGTATCAACAGGGACACCAGGAT  
TTATTTATTCTGCGAAGTGATCTTCCGTCACAGGTATTTATTCGGCGCAAAGTGC  
GTCCGGGTGATGCTGCCAACTTACTGATTTAGTGTATGATGGTGTTTTTGAGGTG  
CTCCAGTGGCTTCTGTTTCTATCAGCTGTCCCTCCTGTTTCAGCTACTGACGGGG  
TGGTGCGTAACGGCAAAGCACCGCCGGACATCAGCGCTAGCGGAGTGTATAC  
TGGCTTACTATGTTGGCACTGATGAGGGTGTGAGTGAAGTGCTTCATGTGGCAG  
GAGAAAAAAGGCTGCACCGGTGCGTCAGCAGAATATGTGATACAGGATATATTC  
CGCTTCTCGCTCACTGACTCGCTACGCTCGGTGCTTCGACTGCGGCGAGCGG  
AAATGGCTTACGAACGGGGCGGAGATTTCTGGAAGATGCCAGGAAGATACTTA  
ACAGGGAAGTGAGAGGGCCGCGGCAAAGCCGTTTTTCCATAGGCTCCGCCCCC  
CTGACAAGCATCACGAAATCTGACGCTCAAATCAGTGGTGGCGAAACCCGACA  
GGACTATAAAGATACCAGGCGTTTTCCCCTGGCGGCTCCCTCGTGCGCTCTCCT

G TTCCTGCCTTTTCGGTTTACCGGTGTCATTCCGCTGTTATGGCCGCGTTTGTCT  
CATTCCACGCCTGACACTCAGTTCCGGGTAGGCAGTTCGCTCCAAGCTGGACT  
GTATGCACGAACCCCGTTCAGTCCGACCGCTGCGCCTTATCCGGTAACTATC  
GTCTTGAGTCCAACCCGAAAGACATGCAAAAGCACCACTGGCAGCAGCCACT  
GGTAATTGATTTAGAGGAGTTAGTCTTGAAGTCATGCGCCGGTTAAGGCTAAAC  
TGAAAGGACAAGTTTTGGTGACTGCGCTCCTCCAAGCCAGTTACCTCGGTTCAA  
AGAGTTGGTAGCTCAGAGAACCCTTCGAAAAACCGCCCTGCAAGGCGGTTTTTTC  
GTTTTCAGAGCAAGAGATTACGCGCAGACCAAACGATCTCAAGAAGATCATCT  
TATTAATCAGATAAAATATTTCTAGATTTTCAAGTGCATTTTATCTCTTCAAATGTAG  
CACCTGAAGTCAGCCCCATACGATATAAGTTGTAATTCTCATGTTTGACAGCTTA  
TCATCGATAAGCTTTAATGCGGTAGTTTATCACAGTTAAATTGCTAACGCAGTCA  
GGCACCGTGTATGAAATCTAACAATGCGCTCATCGTCATCCTCGGCACCGTCAC  
CCTGGATGCTGTAGGCATAGGCTTGGTTATGCCGGTACTGCCGGGCTCTTGC  
GGGATTACGAAATCATCCTGTGGAGCTTAGTAGGTTTAGCAAGATGGCAGCGCC  
TAAATGTAGAATGATAAAAGGATTAAGAGATTAATTTCCCTAAAATGATAAAACA  
AGCGTTTTGAAAGCGCTTGTTTTTTGGTTTGCAGTCAGAGTAGAATAGAAGTAT  
CAAAAAAGCACCGACTCGGTGCCACTTTTTCAAGTTGATAACGGACTAGCCTT  
ATTTAACTTGCTATGCTGTTTTGAATGGTTCCAACAAGATTATTTTATAACTTTTA  
TAACAATAATCAAGGAGAAATTCAAAGAAATTTATCAGCCATAAAACAATACTTA  
ATACTATAGAATGATAACAAAATAAACTACTTTTTAAAAGAATTTTGTGTTATAATC  
TATTTATTATTAAGTATTGGGTAATATTTTTTGAAGAGCGGCCGCTTAATAACAG  
GGGACGTGGTAATCCGTCCCCTTTTTATTTCTGACTGAGTTAATAACAGGCCTG  
CTTCGGCAGGCCTTTTTATTTCTGACTGAGTTCTTCTCAGGCCTGCTGGTAATCG  
CAGGCCTTTTTATTTCTAGTCTGACTGACTGACTGACTGACTGACTGACTGACTGA  
CTGACTGACTGACTGACTGACTGACTGACTGACTGACTGACTGACTGACTGACTGA  
CTGACTGACTGACTGACTGACTGACTGACTGACTGACTGACTGACTGACTGACTGACT  
GACTGACTGACTGACTGACTGACTGACTgactgaCTGACCTCGAGATGGATAAGAA  
ATACTCAATAGGCTTAGCTATCGGCACAAATAGCGTCGGATGGGCGGTGATCAC  
TGATGAATATAAGGTTCCGTCTAAAAGTTCAAGGTTCTGGGAAATACAGACCG  
CCACAGTATCAAAAAAATCTTATAGGGGCTCTTTATTTGACAGTGGAGAGACA  
GCGGAAGCGACTCGTCTCAAACGGACAGCTCGTAGAAGGTATACACGTCCGAA  
GAATCGTATTTGTTATCTACAGGAGATTTTTTCAAATGAGATGGCGAAAGTAGAT  
GATAGTTTCTTTCATCGACTTGAAGAGTCTTTTTTGGTGGAAAGAAGACAAGAAGC  
ATGAACGTCATCCTATTTTTGGAAATATAGTAGATGAAGTTGCTTATCATGAGAA  
ATATCCAATCTATCATCTGCGAAAAAATTGGTAGATTCTACTGATAAAGCG  
GATTTGCGCTTAATCTATTTGGCCTTAGCGCATATGATTAAGTTTCGTGGTCATT  
TTTTGATTGAGGGAGATTTAAATCCTGATAATAGTGATGTGGACAACTATTTAT  
CCAGTTGGTACAAACCTACAATCAATTATTTGAAGAAAACCCTATTAACGCAAGT  
GGAGTAGATGCTAAAGCGATTCTTTCTGCACGATTGAGTAAATCAAGACGATTA  
GAAAATCTCATTGCTCAGCTCCCCGGTGAGAAGAAAAATGGCTTATTTGGGAAT  
CTCATTGCTTTGTCATTGGGTTTACCCTAATTTTTAAATCAAATTTTGATTTGGC  
AGAAGATGCTAAATTACAGCTTTCAAAAGATACTTACGATGATGATTTAGATAATT  
TATTGGCGCAAATTGGAGATCAATATGCTGATTTGTTTTTGGCAGCTAAGAATTT  
ATCAGATGCTATTTTACTTTTACAGATATCCTAAGAGTAAATACTGAAATAACTAAGG

CTCCCCTATCAGCTTCAATGATTAACGCTACGATGAACATCATCAAGACTTGAC  
TCTTTTAAAAGCTTTAGTTTCGACAACAACCTTCCAGAAAAGTATAAAGAAATCTTTT  
TTGATCAATCAAAAAACGGATATGCAGGTTATATTGATGGGGGAGCTAGCCAAG  
AAGAATTTTATAAATTTATCAAACCAATTTTAGAAAAAATGGATGGTACTGAGGAA  
TTATTGGTGAAACTAAATCGTGAAGATTTGCTGCGCAAGCAACGGACCTTTGAC  
AACGGCTCTATTCCCATCAAATTCACCTGGGTGAGCTGCATGCTATTTTGAGAA  
GACAAGAAGACTTTTATCCATTTTTAAAAGACAATCGTGAGAAGATTGAAAAAAT  
CTTGACTTTTTCGAATTCCTTATTATGTTGGTCCATTGGCGCGTGGCAATAGTCGT  
TTTGCATGGATGACTCGGAAGTCTGAAGAAACAATTACCCCATGGAATTTTGAAG  
AAGTTGTCGATAAAGGTGCTTCAGCTCAATCATTTATTGAACGCATGACAACTT  
TGATAAAAATCTTCAAATGAAAAAGTACTACCAAACATAGTTTGCTTTATGAGT  
ATTTTACGGTTTATAACGAATTGACAAAGGTCAAATATGTTACTGAAGGAATGCG  
AAAACCAGCATTTCTTTTCAGGTGAACAGAAGAAAGCCATTGTTGATTTACTCTTC  
AAAACAAATCGAAAAGTAACCGTTAAGCAATTAAGAAGATTATTTCAAAAAAAT  
AGAATGTTTTGATAGTGTGAAATTTTCAGGAGTTGAAGATAGATTTAATGCTTCAT  
TAGGTACCTACCATGATTTGCTAAAAATTATTAAGATAAAGATTTTTTGGATAAT  
GAAGAAAATGAAGATATCTTAGAGGATATTGTTTTAACATTGACCTTATTTGAAGA  
TAGGGAGATGATTGAGGAAAGACTTAAAACATATGCTCACCTCTTTGATGATAAG  
GTGATGAAACAGCTTAAACGTCGCCGTTATACTGGTTGGGGACGTTTGTCTCGA  
AAATTGATTAATGGTATTAGGGATAAGCAATCTGGCAAACAATATTAGATTTTTT  
GAAATCAGATGGTTTTGCCAATCGCAATTTTATGCAGCTGATCCATGATGATAGT  
TTGACATTTAAGAAGACATTCAAAAAGCACAAGTGTCTGGACAAGGCGATAGTT  
TACATGAACATATTGCAAATTTAGCTGGTAGCCCTGCTATTA AAAAAGGTATTTTA  
CAGACTGTAAAAGTTGTTGATGAATTGGTCAAAGTAATGGGGCGGCATAAGCCA  
GAAAATATCGTTATTGAAATGGCACGTGAAAATCAGACAACCTCAAAGGGCCAG  
AAAAATTCGCGAGAGCGTATGAAACGAATCGAAGAAGGTATCAAAGAATTAGGA  
AGTCAGATTCTTAAAGAGCATCCTGTTGAAAATACTCAATTGCAAATGAAAAGC  
TCTATCTCTATTATCTCCAAAATGGAAGAGACATGTATGTGGACCAAGAATTAGA  
TATTAATCGTTTAAAGTGATTATGATGTCGATGCCATTGTTCCACAAAGTTTCCTTA  
AAGACGATTCAATAGACAATAAGGTCTTAACGCGTTCTGATAAAAATCGTGGTAA  
ATCGGATAACGTTCCAAGTGAAGAAGTAGTCAAAAAGATGAAAACTATTGGAG  
ACAACCTTCTAAACGCCAAGTTAATCACTCAACGTAAGTTTGATAATTTAACGAAA  
GCTGAACGTGGAGGTTTGAGTGAACCTTGATAAAGCTGGTTTTATCAAACGCCAA  
TTGGTTGAAACTCGCCAAATCACTAAGCATGTGGCACAAATTTTGGATAGTCGCA  
TGAATACTAAATACGATGAAAATGATAAACTTATTTCGAGAGGTTAAAGTGATTAC  
CTTAAAATCTAAATTAGTTTCTGACTTCCGAAAAGATTTCCAATTCTATAAAGTAC  
GTGAGATTAACAATTACCATCATGCCATGATGCGTATCTAAATGCCGTCGTTGG  
AACTGCTTTGATTAAGAAATATCCAAAACCTTGAATCGGAGTTTGTCTATGGTGAT  
TATAAAGTTTATGATGTTTCGTAAAATGATTGCTAAGTCTGAGCAAGAAATAGGCA  
AAGCAACCGCAAATATTTCTTTTACTCTAATATCATGAACTTCTTCAAACAGAA  
ATTACACTTGCAAATGGAGAGATTTCGCAAACGCCCTCTAATCGAACTAATGGG  
GAAACTGGAGAAATTGTCTGGGATAAAGGGCGAGATTTTGCCACAGTGCGCAA  
GTATTGTCCATGCCCAAGTCAATATTGTCAAGAAAACAGAAGTACAGACAGGC  
GGATTCTCAAGGAGTCAATTTTACCAAAGAAATTCGGACAAGCTTATTGCTC

GTAAAAAAGACTGGGATCCAAAAAATATGGTGGTTTTGATAGTCCAACGGTAG  
CTTATTCAGTCCTAGTGGTTGCTAAGGTGGAAAAAGGAAATCGAAGAAGTTAA  
AATCCGTTAAAGAGTTACTAGGGATCACAAATTATGGAAAGAAGTTCCTTTGAAAA  
AAATCCGATTGACTTTTTTAGAAGCTAAAGGATATAAGGAAGTTAAAAAAGACTTA  
ATCATTAAACTACCTAAATATAGTCTTTTTGAGTTAGAAAACGGTCGTAAACGGA  
TGCTGGCTAGTGCCGGAGAATTACAAAAAGGAAATGAGCTGGCTCTGCCAAGC  
AAATATGTGAATTTTTTATATTTAGCTAGTCATTATGAAAAGTTGAAGGGTAGTCC  
AGAAGATAACGAACAAAAACAATTGTTTGTGGAGCAGCATAAGCATTATTTAGAT  
GAGATTATTGAGCAAATCAGTGAATTTTCTAAGCGTGTTATTTTAGCAGATGCCA  
ATTTAGATAAAGTTCTTAGTGCATATAACAAACATAGAGACAAACCAATACGTGA  
ACAAGCAGAAAATATTATTCATTTATTTACGTTGACGAATCTTGGAGCTCCCGCT  
GCTTTTAAATATTTTGATACAACAATTGATCGTAAACGATATACGTCTACAAAAGA  
AGTTTTAGATGCCACTCTTATCCATCAATCCATCACTGGTCTTTATGAAACACGC  
ATTGATTTGAGTCAGCTAGGAGGTCCTAGGGGAGGTGGCTCAGAAGGTGGCGG  
ATCTGAAGGTGGCTCTGGAActagtATGAGCGATAAAATTATTCACCTGACTGACG  
ACAGTTTTGACACGGATGTA CTCAAAGCGGACGGGGCGATCCTCGTCGATTTCT  
GGGCAGAGTGGTGCGGTCCGTGCAAATGATCGCCCCGATTCTGGATGAAATC  
GCTGACGAATATCAGGGCAAACCTGACCGTTGCAAACCTGAACATCGATCAAAC  
CCTGGCACTGCGCCGAAATATGGCATCCGTGGTATCCCGACTCTGCTGCTGTTC  
AAAACGGTGAAGTGGCGGCAACCAAAGTGGGTGCACTGTCTAAAGGTCAGTT  
GAAAGAGTTCCTCGACGCTAACCTGGCCGGTTCTGGTTCTGGCCATATGCACCA  
TCATCATCATCATTCTTCTGGTCTGGTGCCACGCGGTTCTGGTATGAAAGAAAC  
CGCTGCTGCTAAATTCGAACGCCAGCACATGGACAGCCCAGATCTGGGTACCG  
ACGACGACGACAAGGCCATGGCTGATATCggatccCATATGGAAATGATGCTCGAT  
AAGAAACAGATTCGTGCGATCTTTCTCTTTGAGTTTTAAATGGGTGCGCAAAGCG  
GCGGAGACGACGCGTAATATTAACAACGCGTTCGGTCCCTGGCACCGCGAACGA  
GCGTACCGTGCAATGGTGGTTCAAAAAGTTTCGCAAAGGCGACGAATCTCTGGA  
GGACGAAGAGCGTTCTGGCCGCCCGTCCGAGGTTGACAACGACCAGCTGCGTG  
CAATCATCGAAGCTGATCCGCTGACTACCACCCGCGAAGTTGCTGAAGA ACTGA  
ATGTGGATCACTCTACTGTGGTTCGCCACCTGAAACAGATCGGTAAAGTAAAA  
AACTGGACAAATGGGTTCCCTCATGAACTGTCTGAAAACCAGAAAAACCGTCGTT  
TCGAAGTTAGCTCCTCTCTGATTCTGCGTAACAACAACGAACCGTTCCTGGATC  
GTATCGTAACCTGTGATGAGAAATGGATTCTGTATGATAACCGTCGCCGCTCTG  
CTCAGTGGCTGGATCGCGAAGAAGCTCCAAAACACTTCCCGAAACCGAATCTGC  
ACCAGAAGAAAGTCATGGTAACCGTATGGTGGTCTGCCGCAGGTGTTATCCACT  
ATTCCTTCCTGAACCCGGGCGAAACTATCACCAGCGAAAAATACTGCCAGCAGA  
TTGACGAAATGCACCGTAAACTGCAGCGTCTGCAGCCAGCACTGGTGAATCGTA  
AAGGTCCGATCCTGCTGCATGATAACGCCCGTCCGCACGTTGCCCAACCGACC  
CTGCAGAACTGAACGA ACTGGGCTATGAAGTTCTGCCACACCCGCCGTA CTCC  
CCGGATCTGTCCCCGACTGACTACCATTTCTTCAAGCATCTGGACA ACTTCTG  
CAGGGTAAACGTTTTTACAACCAACAGGACGCAGAAAACGCTTTCCAGGAGTTC  
GTCAAAGCCGTTCCACTGACTTCTACGCGACCGGTATCAACAAGCTGATCAGC  
CGTTGGCAGAAATGCGTGGACTGTAACGGCAGCTACTTCGATTAAGACGTCTTA  
ATAACTAAAAATATGGTATAATACTCTTAATAAATGCAGTAATACAGGGGCTTTTC

AAGACTGAAGTCTAGCTGAGACAAATAGTGCGATTACGAAATTTTTAGACAAAA  
ATAGTCTACGAGGTTTTAGAGCTATGCTGTTTTGAATGGTCCCAAACGGTTTTTC  
CCAGTCACGACGTTGTAAAACGAGTTTTAGAGCTATGCTGTTTTGAATGGTCCCA  
AACTTCAGCACACTGAGACTTGTTGAGTTCCATGTTTTAGAGCTATGCTGTTTT  
GAATGGACTCCATTCAACATTGCCGATGATAACTTGAGAAAGAGGGTTAATACC  
AGCAGTCGGATACCTTCCTATTCTTTCTGTTAAAGCGTTTTTCATGTTATAATAGG  
CAAAGAAGAGTAGTGTGATCGTCCATTCCGACAGCATCGCCAGTCACTATGGC  
GTGCTGCTAGCGCTATATGCGTTGATGCAATTTCTATGCGCACCCGTTCTCGGA  
GCACTGTCCGACCGCTTTGGCCGCCGCCAGTCCTGCTCGCTTCGCTACTTGG  
AGCCACTATCGACTACGCGATCATGGCGACCACACCCGTCCTGTGGATCCTCTA  
CGCCGGACGCATCGTGGCCGGCATCACCGGCCACAGGTGCGGTTGCTGGC  
GCCTATATCGCCGACATCACCGATGGGGAAGATCGGGCTCGCCACTTCGGGCT  
CATGAGCGCTTGTTCGGCGTGGGTATGGTGGCAGGCCCGTGGCCGGGGGA  
CTGTTGGGCGCCATCTCCTTGATGCACCATTCCTTGCGGCGGGCGGTGCTCAA  
CGGCCTCAACCTACTACTGGGCTGCTTCCCTAATGCAGGAGTCGCATAAGGGAG  
AGCGTCGACCGATGCCCTTGAGAGCCTTCAACCCAGTCAGCTCCTTCCGGTGG  
GCGCGGGGCATGACTATCGTCCGCGACTTATGACTGTCTTCTTTATCATGCAA  
CTCGTAGGACAGGTGCCGGCAGCGCTCTGGGTCATTTTCGGCGAGGACCGCTT  
TCGCTGGAGCGCGACGATGATCGGCCTGTCGCTTGCGGTATTCGGAATCTTGC  
ACGCCCTCGCTCAAGCCTTCGTCACTGGTCCCGCCACCAAACGTTTTCGGCGAG  
AAGCAGGCCATTATCGCCGGCATGGCGGGCCGACGCGCTGGGCTACGTCTTGCT  
GGCGTTTCGCGACGCGAGGCTGGATGGCCTTCCCCATTATGATTCTTCTCGCTTC  
CGGCGGCATCGGGATGCCCGCGTTGCAGGCCATGCTGTCCAGGCAGGTAGAT  
GACGACCATCAGGGACAGCTTCAAGGATCGCTCGCGGCTCTTACCAGCCTAAC  
TTCGATCATTGGACCGCTGATCGTCACGGCGATTTATGCCGCCTCGGCGAGCA  
CATGGAACGGGTTGGCATGGATTGTAGGCGCCGCCCTATACCTTGTCTGCCTC  
CCGCGTTGCGTTCGCGGTGCATGGAGCCGGGCCACCTCGACCTGAATGGAAG  
CCGGCGGCACCTCGCTAACGGATTCACCACTCCAAGAATTGGAGCCAATCAATT  
CTTGCGGAGAACTGTGAATGCGCAAACCAACCCTTGGCAGAACATATCCATCGC  
GTCCGCCATCTCCAGCAGCCGCACGCGGGCGCATCTCGGGCAGCGTTGGGTCCCT  
GGCCACGGGTGCGCATGATCGTCTCCTGTGCTTGAGGACCCGGCTAGGCTGG  
CGGGGTTGCCTTACTGGTTAGCAGAATGAATCACCGATACGCGAGCGAACGTG  
AAGCGACTGCTGCTGCAAAACGTCTGCGACCTGAGCAACAACATGAATGGTCTT  
CGGTTTCCGTGTTTCGTAAAGTCTGGAAACGCGGAAGTCCCCTACGTGCTGCTG  
AAGTTGCCCGCAACAGAGAGTGGAAACCAACCGGTGATACCACGATACTATGACT  
GAGAGTCAACGCCATGAGCGGCCTCATTTCTTATTCTGAGTTACAACAGTCCGC  
ACCGCTGTCCGGTAGCTCCTTCCGGTGGGCGCGGGGCATGACTATCGTCGCCCG  
CACTTATGACTGTCTTCTTTATCATGCAACTCGTAGGACAGGTGCCGGCAGCGC  
CCAACAGTCCCCCGGCCACGGGGCCTGCCACCATAACCACGCCGAAACAAGC  
GCCCTGCACCATTATGTTCCGGATCTGCATCGCAGGATGCTGCTGGCTACCCTG  
TGGAACACCTACATCTGTATTAACGAAGCGCTAACCGTTTTTATCAGGCTCTGG  
GAGGCAGAATAAATGATCATATCGTCAATTATTACCTCCACGGGGAGAGCCTGA  
GCAAACCTGGCCTCAGGCATTTGAGAAGCACACGGTCACACTGCTTCCGGTAGTC  
ATAAACCGGTAAACCAGCAATAGACATAAGCGGCTATTTAACGACCCTGCCCT

GAACCGACGACCGGGTCGAATTTGCTTTGCAATTTCTGCCATTCATCCGCTTATT  
ATCACTTATTCAGGCGTAGCACCAGGCGTTTAAGGGCACCAATAACTGCCTTAA  
AAAAATTACGCCCCGCCCTGCCACTCATCGCAGTACTGTTGTAATTCATTAAGCA  
TTCTGCCGACATGGAAGCCATCACAGACGGCATGATGAACCTGAATCGCCAGC  
GGCATCAGCACCTTGTGCGCTTGGCGTATAATATTTGCCCATGGTGAAAACGGGG  
GCGAAGAAGTTGTCCATATTGGCCACGTTTAAATCAAACCTGGTGAAACTCACC  
CAGGGATTGGCTGAGACGAAAAACATATTCTCAATAAACCCCTTTAGGGAAATAG  
GCCAGGTTTTTCACCGTAACACGCCACATCTTGCGAATATATGTGTAGAACTGC  
CGGAAATCGTCGTGGTATTCACTCCAGAGCGATGAAAACGTTTCAGTTTGCTCA  
TGGAACCGGTGTAACAAGGGTGAACACTATCCCATATCACCAGCTCACCGTCT  
TTCATTGCCATACG

pRC2309

GAATTCCGGATGAGCATTTCATCAGGCGGGCAAGAATGTGAATAAAGGCCGGAT  
AAACTTGTGCTTATTTTTCTTTACGGTCTTTAAAAGGCCGTAATATCCAGCTGA  
ACGGTCTGGTTATAGGTACATTGAGCAACTGACTGAAATGCCTCAAATGTTCTT  
TACGATGCCATTGGGATATATCAACGGTGGTATATCCAGTGATTTTTTTCTCCAT  
TTTAGCTTCCTTAGCTCCTGAAAATCTCGATAACTCAAAAATACGCCCGGTAGT  
GATCTTATTTTATTATGGTGAAAGTTGGAACCTCTTACGTGCCGATCAACGTCTC  
ATTTTCGCCAAAAGTTGGCCCAGGGCTTCCCGGTATCAACAGGGACACCAGGAT  
TTATTTATTCTGCGAAGTGATCTTCCGTACAGGTATTTATTTCGGCGCAAAGTGC  
GTCGGGTGATGCTGCCAACTTACTGATTTAGTGTATGATGGTGTTTTTGAGGTG  
CTCCAGTGGCTTCTGTTTCTATCAGCTGTCCCTCCTGTTTCAGCTACTGACGGGG  
TGGTGCGTAACGGCAAAGCACCGCCGGACATCAGCGCTAGCGGAGTGTATAC  
TGGCTTACTATGTTGGCACTGATGAGGGTGTGAGTGAAGTGCTTCATGTGGCAG  
GAGAAAAAAGGCTGCACCGGTGCGTCAGCAGAATATGTGATACAGGATATATTC  
CGCTTCCTCGCTCACTGACTCGCTACGCTCGGTGCTTCGACTGCGGCGAGCGG  
AAATGGCTTACGAACGGGGCGGAGATTTCTGGAAGATGCCAGGAAGATACTTA  
ACAGGGAAGTGAGAGGGCCGCGGCAAAGCCGTTTTTTCCATAGGCTCCGCCCC  
CTGACAAGCATCACGAAATCTGACGCTCAAATCAGTGGTGGCGAAACCCGACA  
GGACTATAAAGATACCAGGCGTTTCCCCTGGCGGCTCCCTCGTGCGCTCTCCT  
GTTCTGCTTTTCGGTTTACCGGTGTCATTCCGCTGTTATGGCCGCGTTTGTCT  
CATTCCACGCCTGACACTCAGTTCCGGGTAGGCAGTTCGCTCCAAGCTGGACT  
GTATGCACGAACCCCCGTTTCAGTCCGACCGCTGCGCCTTATCCGGTAACTATC  
GTCTTGAGTCCAACCCGAAAGACATGCAAAGCACCACTGGCAGCAGCCACT  
GGTAATTGATTTAGAGGAGTTAGTCTTGAAGTCATGCGCCGGTTAAGGCTAAAC  
TGAAAGGACAAGTTTTGGTGACTGCGCTCCTCCAAGCCAGTTACCTCGGTTCAA  
AGAGTTGGTAGCTCAGAGAACCTTCGAAAACCGCCCTGCAAGGCGGTTTTTTTC  
GTTTTTCAGAGCAAGAGATTACGCGCAGACCAAACGATCTCAAGAAGATCATCT  
TATTAATCAGATAAAATATTTCTAGATTTTCAGTGCAATTTATCTCTTCAAATGTAG  
CACCTGAAGTCAGCCCCATACGATATAAGTTGTAATTCTCATGTTTGACAGCTTA  
TCATCGATAAGCTTTAATGCGGTAGTTTATCACAGTTAAATTGCTAACGCAGTCA  
GGCACCGTGTATGAAATCTAACAATGCGCTCATCGTCATCCTCGGCACCGTCAC

CCTGGATGCTGTAGGCATAGGCTTGGTTATGCCGGTACTGCCGGGCCTCTTGC  
GGGATTACGAAATCATCCTGTGGAGCTTAGTAGGTTTAGCAAGATGGCAGCGCC  
TAAATGTAGAATGATAAAAGGATTAAGAGATTAATTTCCCTAAAATGATAAAACA  
AGCGTTTTGAAAGCGCTTGTTTTTTTGGTTTGCAGTCAGAGTAGAATAGAAGTAT  
CAAAAAAGCACCGACTCGGTGCCACTTTTTCAAGTTGATAACGGACTAGCCTT  
ATTTAACTTGCTATGCTGTTTTGAATGGTTCCAACAAGATTATTTATAACTTTTA  
TAACAATAATCAAGGAGAAATTCAAAGAAATTTATCAGCCATAAAACAATACTTA  
ATACTATAGAATGATAACAAAATAAACTACTTTTTAAAAGAATTTTGTGTTATAATC  
TATTTATTATTAAGTATTGGGTAATATTTTTGAAGAGCggccgctaatacgaactcactatag  
ggagaggatccgcggaattgCAGCTGGTTAATAACAGGGGACGTGGTAATCCGTCCCCT  
TTTTATTTCTGACTGAGTTAATAACAGGCCTGCTTCGGCAGGCCTTTTTATTTCT  
GACTGAGTTCTTCTCAGGCCTGCTGGTAATCGCAGGCCTTTTTATTTCTAGACA  
ATTCCGACGTCTAAGGAAACCATTATCATGACATCAACCTATAAAAATAGGCGTA  
TCACGAGGCCCTCTCGTCTCCACCTCAAGCTCCCTATCTAGTGATAGCGATTGA  
CATCCCTATCAGTGACGGAGATATTGAGCACATCAGCAGGACGCACTGACCACT  
TTAAGaggaggCTCGAGATGGATAAGAAATACTCAATAGGCTTAGCTATCGGCACA  
AATAGCGTCCGATGGGCGGTGATCACTGATGAATATAAGGTTCCGTCTAAAAG  
TTCAAGGTTCTGGGAAATACAGACCGCCACAGTATCAAAAAAATCTTATAGGG  
GCTCTTTTTATTTGACAGTGGAGAGACAGCGGAAGCGACTCGTCTCAAACGGACA  
GCTCGTAGAAGGTATACACGTCGGAAGAATCGTATTTGTTATCTACAGGAGATTT  
TTTCAAATGAGATGGCGAAAGTAGATGATAGTTTCTTTCATCGACTTGAAGAGTC  
TTTTTTGGTGAAGAAGACAAGAAGCATGAACGTCATCCTATTTTTGGAAATATA  
GTAGATGAAGTTGCTTATCATGAGAAATATCCAATCTATCATCTGCGAAAAA  
AATTGGTAGATTCTACTGATAAAGCGGATTTGCGCTTAATCTATTTGGCCTTAGC  
GCATATGATTAAGTTTCGTGGTCATTTTTTTGATTGAGGGAGATTTAAATCCTGAT  
AATAGTGATGTGGACAACTATTTATCCAGTTGGTACAAACCTACAATCAATTATT  
TGAAGAAAACCTATTAACGCAAGTGGAGTAGATGCTAAAGCGATTCTTTCTGCA  
CGATTGAGTAAATCAAGACGATTAGAAAATCTCATTGCTCAGCTCCCCGGTGAG  
AAGAAAAATGGCTTATTTGGGAATCTCATTGCTTTGTCATTGGGTTTGACCCCTA  
ATTTAAATCAAATTTTGATTTGGCAGAAGATGCTAAATTACAGCTTTCAAAGAT  
ACTTACGATGATGATTTAGATAATTTATTGGCGCAAATTGGAGATCAATATGCTG  
ATTTGTTTTTTGGCAGCTAAGAATTTATCAGATGCTATTTTACTTTTACAGATATCCTA  
AGAGTAAATACTGAAATAACTAAGGCTCCCCTATCAGCTTCAATGATTAACGCT  
ACGATGAACATCATCAAGACTTACTCTTTTTAAAAGCTTTAGTTTCGACAACA  
TCCAGAAAAGTATAAAGAAATCTTTTTTATCAATCAAAAAACGGATATGCAGGT  
TATATTGATGGGGGAGCTAGCCAAGAAGAATTTTATAAATTTATCAAACCAATTTT  
AGAAAAAATGGATGGTACTGAGGAATTATTGGTGAAACTAAATCGTGAAGATTTG  
CTGCGCAAGCAACGGACCTTTGACAACGGCTCTATTCCCATCAAATCACTTG  
GGTGAGCTGCATGCTATTTTGAGAAGACAAGAAGACTTTTATCCATTTTTAAAAG  
ACAATCGTGAGAAGATTGAAAAAATCTTGACTTTTCGAATTCCTTATTATGTTGGT  
CCATTGGCGCGTGGCAATAGTCGTTTTGCATGGATGACTCGGAAGTCTGAAGAA  
ACAATTACCCCATGGAATTTTGAAGAAGTTGTCGATAAAGGTGCTTCAGCTCAAT  
CATTTATTGAACGCATGACAACTTTGATAAAAATCTTCAAATGAAAAAGTACTA  
CCAAAACATAGTTTGCTTTATGAGTATTTTACGGTTTATAACGAATTGACAAAGGT

CAAATATGTTACTGAAGGAATGCGAAAACCAGCATTTCCTTTCAGGTGAACAGAA  
GAAAGCCATTGTTGATTTACTCTTCAAACAAATCGAAAAGTAACCGTTAAGCAA  
TAAAAGAAGATTATTTCAAAAAAATAGAATGTTTTGATAGTGTTGAAATTTTCAGG  
AGTTGAAGATAGATTTAATGCTTCATTAGGTACCTACCATGATTTGCTAAAAATTA  
TAAAGATAAAGATTTTTTGGATAATGAAGAAAATGAAGATATCTTAGAGGATATT  
GTTTTAACATTGACCTTATTTGAAGATAGGGAGATGATTGAGGAAAGACTTAAAA  
CATATGCTCACCTCTTTGATGATAAGGTGATGAAACAGCTTAAACGTGCGCGTTA  
TACTGGTTGGGGACGTTTGTCTCGAAAATTGATTAATGGTATTAGGGATAAGCAA  
TCTGGCAAACAATATTAGATTTTTTGAATCAGATGGTTTTGCCAATCGCAATTT  
TATGCAGCTGATCCATGATGATAGTTTGACATTTAAGAAGACATTCAAAAAGCA  
CAAGTGTCTGGACAAGGCGATAGTTTACATGAACATATTGCAAATTTAGCTGGTA  
GCCCTGCTATTA AAAAAGGTATTTTACAGACTGTAAAAGTTGTTGATGAATTGGT  
CAAAGTAATGGGGCGGCATAAGCCAGAAAATATCGTTATTGAAATGGCACGTGA  
AAATCAGACA ACTCAAAGGGCCAGAAAATTCGCGAGAGCGTATGAAACGAAT  
CGAAGAAGGTATCAAAGAATTAGGAAGTCAGATTCTTAAGAGCATCCTGTTGA  
AAATACTCAATTGCAAATGAAAAGCTCTATCTCTATTATCTCCAAAATGGAAGA  
GACATGTATGTGGACCAAGAATTAGATATTAATCGTTTAAGTGATTATGATGTCG  
ATGCCATTGTTCCACAAAGTTTCCTTAAGACGATTCAATAGACAATAAGGTCTT  
AACGCGTTCTGATAAAAATCGTGGTAAATCGGATAACGTTCCAAGTGAAGAAGT  
AGTCAAAAAGATGAAAAC TATTGGAGACA ACTTCTAAACGCCAAGTTAATCACT  
CAACGTAAGTTTGATAATTTAACGAAAGCTGAACGTGGAGGTTTGAGTGA ACTTG  
ATAAAGCTGGTTTTATCAAACGCCAATTGGTTGAAACTCGCCAATCACTAAGCA  
TGTGGCACA AATTTTGGATAGTCGCATGAATACTAAATACGATGAAAATGATAAA  
CTTATTCGAGAGGTTAAAGTGATTACCTTAAATCTAAATTAGTTTCTGACTTCCG  
AAAAGATTTCCAATTCTATAAAGTACGTGAGATTAACAATTACCATCATGCCCAT  
GATGCGTATCTAAATGCCGTCGTTGGA ACTGCTTTGATTAAGAAATATCCAAAAC  
TTGAATCGGAGTTTGTCTATGGTGATTATAAAGTTTATGATGTTTCGTAAAATGATT  
GCTAAGTCTGAGCAAGAAATAGGCAAAGCAACCGCAA AATATTTCTTTTACTCTA  
ATATCATGA ACTTCTTCAAACAGAAATTACACTTGCAAATGGAGAGATTGCGAA  
ACGCCCTCTAATCGAAACTAATGGGGAAACTGGAGAAATTGTCTGGGATAAAGG  
GCGAGATTTT GCCACAGTGCGCAAAGTATTGTCCATGCCCAAGTCAATATTGT  
CAAGAAAACAGAAGTACAGACAGGCGGATTCTCCAAGGAGTCAATTTTACCAA  
AAGAAATTCGGACAAGCTTATTGCTCGTAAAAAAGACTGGGATCCAAAAAATAT  
GGTGGTTTTGATAGTCCAACGGTAGCTTATT CAGTCCTAGTGGTTGCTAAGGTG  
GAAAAGGGAAATCGAAGAAGTTAAATCCGTTAAAGAGTTACTAGGGATCACA  
ATTATGGAAAGAAGTTCCTTTGAAAAAATCCGATTGACTTTTTAGAAAGCTAAAG  
GATATAAGGAAGTTAAAAAAGACTTAATCATTAAACTACCTAAATATAGTCTTTTT  
GAGTTAGAAAACGGTTCGTAAACGGATGCTGGCTAGTGCCGGAGAATTACAAAA  
GGAAATGAGCTGGCTCTGCCAAGCAAATATGTGAATTTTTTATATTTAGCTAGTC  
ATTATGAAAAGTTGAAGGGTAGTCCAGAAGATAACGAACAAAAACAATTGTTTGT  
GGAGCAGCATAAGCATTATTTAGATGAGATTATTGAGCAAATCAGTGAATTTTCT  
AAGCGTGTTATTTTAGCAGATGCCAATTTAGATAAAGTTCTTAGTG CATATAACA  
AACATAGAGACAAACCAATACGTGAACAAGCAGAAAATATTATTCATTTATTTAC  
GTTGACGAATCTTGGAGCTCCCGCTGCTTTTAAATATTTTGATACAACAATTGAT



CGTAAACGATATACGTCTACAAAAGAAGTTTTAGATGCCACTCTTATCCATCAAT  
CCATCACTGGTCTTTATGAAACACGCATTGATTTGAGTCAGCTAGGAGGTCCCTA  
GGGAGGTGGCTCAGAAGGTGGCGGATCTGAAGGTGGCTCTGGAactagtATGA  
GCGATAAAATTATTCACCTGACTGACGACAGTTTTGACACGGATGTAICTCAAAGC  
GGACGGGGCGATCCTCGTGCATTTCTGGGCAGAGTGGTGCGGTCCGTGCAAAA  
TGATCGCCCCGATTCTGGATGAAATCGCTGACGAATATCAGGGCAAACCTGACCG  
TTGCAAACCTGAACATCGATCAAAACCCTGGCACTGCGCCGAAATATGGCATCC  
GTGGTATCCCGACTCTGCTGCTGTTCAAAAACGGTGAAGTGGCGGCAACCAAA  
GTGGGTGCACTGTCTAAAGGTCAGTTGAAAGAGTTCCTCGACGCTAACCTGGCC  
GGTTCTGGTTCTGGCCATATGCACCATCATCATCATTCTTCTGGTCTGGTGC  
CACGCGGTTCTGGTATGAAAGAAACCGCTGCTGCTAAATTCGAACGCCAGCACA  
TGGACAGCCCAGATCTGGGTACCGACGACGACGACAAGGCCATGGCTGATATC  
ggatccCATATGGAATGATGCTCGATAAGAAACAGATTCGTGCGATCTTTCTCTTT  
GAGTTTAAATGGGTGCGAAAGCGGCGGAGACGACGCGTAATATTAACAACGC  
GTTCCGTCTGGCACCGCGAACGAGCGTACCGTGCAATGGTGGTTCAAAAAGT  
TTCGCAAAGGCGACGAATCTCTGGAGGACGAAGAGCGTTCTGGCCGCCCGTCC  
GAGGTTGACAACGACCAGCTGCGTGCAATCATCGAAGCTGATCCGCTGACTAC  
CACCCGCGAAGTTGCTGAAGAACTGAATGTGGATCACTCTACTGTGGTTCGCCA  
CCTGAAACAGATCGGTAAAGTAAAAAACTGGACAAATGGGTTCCCTCATGAACT  
GTCTGAAAACCGAGAAAACCGTTCGTTTCGAAGTTAGCTCCTCTCTGATTCTGCGT  
AACAAACGAACCGTTCCCTGGATCGTATCGTAACCTGTGATGAGAAATGGATT  
CTGTATGATAACCGTCCCGCTCTGCTCAGTGGCTGGATCGCGAAGAAGCTCC  
AAAACACTTCCCGAAACCGAATCTGCACCAGAAGAAAGTCATGGTAACCGTATG  
GTGGTCTGCCGCAGGTGTTATCCACTATTCCTTCCCTGAACCCGGGCGAAACTAT  
CACCAGCGAAAATACTGCCAGCAGATTGACGAAATGCACCGTAAACTGCAGCG  
TCTGCAGCCAGCACTGGTGAATCGTAAAGGTCCGATCCTGCTGCATGATAACGC  
CCGTCCGCACGTTGCCCAACCGACCCTGCAGAACTGAACGAACTGGGCTATG  
AAGTTCTGCCACACCCGCCGTAATCCCCGGATCTGTCCCCGACTGACTACCATT  
TCTTCAAGCATCTGGACAACCTTCCTGCAGGGTAAACGTTTTTACAACCAACAGG  
ACGCAGAAAACGCTTTCCAGGAGTTTCGTGCAAAGCCGTTCCACTGACTTCTACG  
CGACCGGTATCAACAAGCTGATCAGCCGTTGGCAGAAATGCGTGGACTGTAAC  
GGCAGCTACTTCGATTAAGACGTCTTAATAACTAAAAATATGGTATAATACTCTTA  
ATAAATGCAGTAATACAGGGGCTTTTCAAGACTGAAGTCTAGCTGAGACAAATA  
GTGCGATTACGAAATTTTTAGACAAAATAGTCTACGAGGTTTTAGAGCTATGC  
TGTTTTGAATGGTCCCAAACGGTTTTCCAGTCACGACGTTGTAAAACGAGTTT  
TAGAGCTATGCTGTTTTGAATGGTCCCAAACCTTCAGCACACTGAGACTTGTTGA  
GTTCCATGTTTTAGAGCTATGCTGTTTTGAATGGACTCCATTCAACATTGCCGAT  
GATAACTTGAGAAAGAGGGTTAATACCAGCAGTCGGATACCTTCCCTATTCTTTCT  
GTTAAAGCGTTTTTCATGTTATAATAGGCAAAGAAGAGTAGTGTGATCGTCCATT  
CCGACAGCATCGCCAGTCACTATGGCGTGCTGCTAGCGCTATATGCGTTGATGC  
AATTTCTATGCGCACCCGTTCTCGGAGCACTGTCCGACCGCTTTGGCCGCCGC  
CCAGTCCTGCTCGCTTCGCTACTTGGAGCCACTATCGACTACGCGATCATGGCG  
ACCACACCCGTCCTGTGGATCCTCTACGCCGGACGCATCGTGGCCGGCATCAC  
CGGCGCCACAGGTGCGGTTGCTGGCGCCTATATCGCCGACATCACCGATGGGG

AAGATCGGGCTCGCCACTTCGGGCTCATGAGCGCTTGTTTTCGGCGTGGGTATG  
GTGGCAGGCCCGTGGCCGGGGGACTGTTGGGCGCCATCTCCTTGCATGCAC  
CATTCTTGCGGCGGCGGTGCTCAACGGCCTCAACCTACTACTGGGCTGCTTC  
CTAATGCAGGAGTCGCATAAGGGAGAGCGTCGACCGATGCCCTTGAGAGCCTT  
CAACCCAGTCAGCTCCTTCCGGTGGGCGCGGGGCATGACTATCGTCGCCGCAC  
TTATGACTGTCTTCTTTATCATGCAACTCGTAGGACAGGTGCCGGCAGCGCTCT  
GGGTCATTTTCGGCGAGGACCGCTTTCGCTGGAGCGCGACGATGATCGGCCTG  
TCGCTTGCGGTATTCGGAATCTTGCACGCCCTCGCTCAAGCCTTCGTCACTGGT  
CCCGCCACCAAACGTTTCGGCGAGAAGCAGGCCATTATCGCCGGCATGGCGGC  
CGACGCGCTGGGCTACGTCTTGTCTGGCGTTTCGCGACGCGAGGCTGGATGGCC  
TTCCCATTATGATTCTTCTCGCTTCCGGCGGCATCGGGATGCCCGCGTTGCAG  
GCCATGCTGTCCAGGCAGGTAGATGACGACCATCAGGGACAGCTTCAAGGATC  
GCTCGCGGCTCTTACCAGCCTAACTTCGATCATTGGACCGCTGATCGTCACGGC  
GATTTATGCCGCCTCGGCGAGCACATGGAACGGGTTGGCATGGATTGTAGGCG  
CCGCCCTATACCTTGTCTGCCTCCCCGCGTTGCGTCGCGGTGCATGGAGCCGG  
GCCACCTCGACCTGAATGGAAGCCGGCGGCACCTCGCTAACGGATTCACCACT  
CCAAGAATTGGAGCCAATCAATTCTTGCGGAGAAGTGTGAATGCGCAAACCAAC  
CCTTGGCAGAACATATCCATCGCGTCCGCCATCTCCAGCAGCCGCACGCGGCG  
CATCTCGGGCAGCGTTGGGTCCTGGCCACGGGTGCGCATGATCGTGCTCCTGT  
CGTTGAGGACCCGGCTAGGCTGGCGGGGTTGCCTTACTGGTTAGCAGAATGAA  
TCACCGATACGCGAGCGAACGTGAAGCGACTGCTGCTGCAAACGTCTGCGAC  
CTGAGCAACAACATGAATGGTCTTCCGGTTTCCGTGTTTCGTAAAGTCTGGAAAC  
GCGGAAGTCCCCTACGTGCTGCTGAAGTTGCCCGCAACAGAGAGTGGAAACAA  
CCGGTGATAACCACGATACTATGACTGAGAGTCAACGCCATGAGCGGCCTCATTT  
CTTATTCTGAGTTACAACAGTCCGCACCGCTGTCCGGTAGCTCCTTCCGGTGGG  
CGCGGGGCATGACTATCGTCGCCGCACTTATGACTGTCTTCTTTATCATGCAAC  
TCGTAGGACAGGTGCCGGCAGCGCCCAACAGTCCCCCGGCCACGGGGCCTGC  
CACCATACCCACGCCGAAACAAGCGCCCTGCACCATTATGTTCCGGATCTGCAT  
CGCAGGATGCTGCTGGCTACCCTGTGGAACACCTACATCTGTATTAACGAAGCG  
CTAACCGTTTTTATCAGGCTCTGGGAGGCAGAATAAATGATCATATCGTCAATTA  
TTACCTCCACGGGGAGAGCCTGAGCAAACCTGGCCTCAGGCATTTGAGAAGCAC  
ACGGTCACACTGCTTCCGGTAGTCAATAAACCGGTAAACCAGCAATAGACATAA  
GCGGCTATTTAACGACCCTGCCCTGAACCGACGACCGGGTTCGAATTTGCTTTCCG  
AATTTCTGCCATTCATCCGCTTATTATCACTTATTACAGGCGTAGCACCAAGCGTT  
TAAGGGCACCAATAACTGCCTTAAAAAATTACGCCCGCCCTGCCACTCATCG  
CAGTACTGTTGTAATTCATTAAGCATTCTGCCGACATGGAAGCCATCACAGACG  
GCATGATGAACCTGAATCGCCAGCGGCATCAGCACCTTGTCGCCTTGCGTATAA  
TATTTGCCCATGGTGAAAACGGGGGCGAAGAAGTTGTCCATATTGGCCACGTTT  
AAATCAAACCTGGTGAAACTCACCCAGGGATTGGCTGAGACGAAAAACATATTC  
TCAATAAACCTTTAGGGAAATAGGCCAGGTTTTACCGTAACACGCCACATCTT  
GCGAATATATGTGTAGAAACTGCCGGAAATCGTCGTGGTATTCACTCCAGAGCG  
ATGAAAACGTTTCAGTTTGCTCATGGAAAACGGTGTAACAAGGGTGAACACTAT  
CCCATATCACCAAGCTCACCGTCTTTCATTGCCATACG

pRC2311

TTTCTCTGTCCTTCCTGTGCGACGGTTACGCCGCTCCATGAGCTTATCGCGAAT  
AAATACCTGTGACGGAAGATCACTTCGCAGAATAAATAAATCCTGGTGTCCCTGT  
TGATACCGGGAAGCCCTGGGCCAACCTTTTGGCGAAAATGAGACGTTGATCGGC  
ACGTAAGAGGTTCCAACCTTTCACCATAATGAAATAAGATCACTACCGGGCGTATT  
TTTTGAGTTATCGAGATTTTTCAGGAGCTAAGGAAGCTAAAATGGAGAAAAAATC  
ACTGGATATAACCACCGTTGATATATCCCAATGGCATCGTAAAGAACATTTTGAGG  
CATTTTCAGTCAGTTGCTCAATGTACCTATAACCAGACCGTTCAGCTGGATATTAC  
GGCCTTTTTAAAGACCGTAAAGAAAAATAAGCACAAGTTTTATCCGGCCTTTATT  
CACATTCTTGCCCGCCTGATGAATGCTCATCCGGAGTTCCGTATGGCAATGAAA  
GACGGTGAGCTGGTGATATGGGATAGTGTTACCCCTTGTTACACCGTTTTCCAT  
GAGCAAACCTGAAACGTTTTTCATCGCTCTGGAGTGAATACCACGACGATTTCCGG  
CAGTTTCTACACATATATTCGCAAGATGTGGCGTGTTACGGTGAAAACCTGGCC  
TATTTCCCTAAAGGGTTTATTGAGAATATGTTTTTCGTCTCAGCCAATCCCTGGG  
TGAGTTTCACCAGTTTTGATTTAAACGTGGCCAATATGGACAACCTTCTTCGCCCC  
CGTTTTTCACCATGGGCAAATATTATACGCAAGGCGACAAGGTGCTGATGCCGCT  
GGCGATTCAGGTTTCATCATGCCGTTTGTGATGGCTTCCATGTCGGCAGAATGCT  
TAATGAATTACAACAGTACTGCGATGAGTGGCAGGGCGGGGCGTAATTTTTTTA  
AGGCAGTTATTGGTGCCCTTAAACGCCTGGTTGCTACGCCTGAATAAGTGATAA  
TAAGCGGATGAATGGCAGAAATTCGATGATAAGCTGTCAAACATGAGAATTGGT  
CGACGGCGCGCCAAAGCTTGCATGCCTGCAGCCGCGTAACCTGGCAAATCGG  
TTACGGTTGAGTAATAAATGGATGCCCTGCGTAAGCGGGGCACATTTTCATTACC  
TCTTTCTCCGCACCCGACATAGATAATAACTTCGTATAGTATACATTATACGAAG  
TTATCTAGTAGACTTAATTAAGGATCGATCCGGCGCGCCAATAGTCATGCCCCG  
CGCCACCGGAAGGAGCTGACTGGGTTGAAGGCTCTCAAGGGCATCGGTCTGA  
GCTTGACATTGTAGGACTATATTGCTCTAATAAATTTGCGGCCGCTAATACGACT  
CACTATAGGGAGAGGATCCGCGGGATTACGAAATCATCCTGTGGAGCTTAGTAG  
GTTTAGCAAGATGGCAGCGCCTAAATGTAGAATGATAAAAGGATTAAGAGATTA  
ATTTCCCTAAAAATGATAAAACAAGCGTTTTTAAAAGCGCTTGTTTTTTTGGTTTGC  
AGTCAGAGTAGAATAGAAGTATCAAAAAAAGCACCGACTCGGTGCCACTTTTTTC  
AAGTTGATAACGGACTAGCCTTATTTTAACTTGCTATGCTGTTTTGAATGGTTCC  
AACAAGATTATTTTATAACTTTTATAACAAATAATCAAGGAGAAATTCAAAGAAAT  
TTATCAGCCATAAAACAATACTTAATACTATAGAATGATAACAAAATAAACTACTT  
TTAAAAGAATTTTGTGTTATAATCTATTTATTATTAAGTATTGGGTAATATTTTTT  
GAAGAGCGGCCGCGTTAATAACAGGGGACGTGGTAATCCGTCCCCTTTTTATTT  
CTGACTGAGTTAATAACAGGCCTGCTTCGGCAGGCCTTTTTATTTCTGACTGAGT  
TCTTCTCAGGCCTGCTGGTAATCGCAGGCCTTTTTATTTTCTAGTCTGACTGACT  
GACTGACTGACTGACTGACTGACTGACTGACTGACTGACTGACTGACTGACTGA  
CTGACTGACTGACTGACTGACTGACTGACTGACTGACTGACTGACTGACTGACT  
GACTGACTGACTGACTGACTGACTGACTGACTGACTGACTGACTGACTGACTGA  
CTGACTGACCTCGAGATGGATAAGAAATACTCAATAGGCTTAGCTATCGGCACA  
AATAGCGTCCGATGGGCGGTGATCACTGATGAATATAAGGTTCCGTCTAAAAG  
TTCAAGGTTCTGGGAAATACAGACCGCCACAGTATCAAAAAAATCTTATAGGG  
GCTCTTTTATTTGACAGTGGAGAGACAGCGGAAGCGACTCGTCTCAAACGGACA

GCTCGTAGAAGGTATACACGTCGGAAGAATCGTATTTGTTATCTACAGGAGATTT  
TTTCAAATGAGATGGCGAAAGTAGATGATAGTTTCTTTCATCGACTTGAAGAGTC  
TTTTTTGGTGAAGAAGACAAGAAGCATGAACGTCATCCTATTTTTGGAAATATA  
GTAGATGAAGTTGCTTATCATGAGAAATATCCAACCTATCTATCATCTGCGAAAA  
AATTGGTAGATTCTACTGATAAAGCGGATTTGCGCTTAATCTATTTGGCCTTAGC  
GCATATGATTAAGTTTCGTGGTCATTTTTGATTGAGGGAGATTTAAATCCTGAT  
AATAGTGATGTGGACAAACTATTTATCCAGTTGGTACAAACCTACAATCAATTATT  
TGAAGAAAACCCTATTAACGCAAGTGGAGTAGATGCTAAAGCGATTCTTTCTGCA  
CGATTGAGTAAATCAAGACGATTAGAAAATCTCATTGCTCAGCTCCCCGGTGAG  
AAGAAAAATGGCTTATTTGGGAATCTCATTGCTTTGTCATTGGGTTTGACCCCTA  
ATTTTAAATCAAATTTTGATTTGGCAGAAGATGCTAAATTACAGCTTTCAAAGAT  
ACTTACGATGATGATTTAGATAATTTATTGGCGCAAATTGGAGATCAATATGCTG  
ATTTGTTTTTGGCAGCTAAGAATTTATCAGATGCTATTTTACTTTTCAGATATCCTA  
AGAGTAAATACTGAAATAACTAAGGCTCCCCTATCAGCTTCAATGATTAACGCT  
ACGATGAACATCATCAAGACTTGACTIONTTTAAAAGCTTTAGTTTCGACAACA  
TCCAGAAAAGTATAAAGAAATCTTTTTGATCAATCAAAAAACGGATATGCAGGT  
TATATTGATGGGGGAGCTAGCCAAGAAGAATTTTATAAATTTATCAAACCAATTTT  
AGAAAAAATGGATGGTACTGAGGAATTATTGGTGAAACTAAATCGTGAAGATTTG  
CTGCGCAAGCAACGGACCTTTGACAACGGCTCTATTCCCATCAAATTCACTTG  
GGTGAGCTGCATGCTATTTTGAGAAGACAAGAAGACTTTTATCCATTTTTAAAG  
ACAATCGTGAGAAGATTGAAAAAATCTTGACTTTTCGAATTCCTTATTATGTTGGT  
CCATTGGCGCGTGGCAATAGTCGTTTTGCATGGATGACTCGGAAGTCTGAAGAA  
ACAATTACCCCATGGAATTTTGAAGAAGTTGTCGATAAAGGTGCTTCAGCTCAAT  
CATTTATTGAACGCATGACAAACTTTGATAAAAATCTTCAAATGAAAAAGTACTA  
CCAAAACATAGTTTGCTTTATGAGTATTTTACGGTTTATAACGAATTGACAAAGGT  
CAAATATGTTACTGAAGGAATGCGAAAACCAGCATTTCCTTCAGGTGAACAGAA  
GAAAGCCATTGTTGATTTACTCTTCAAACAAATCGAAAAGTAACCGTTAAGCAA  
TTAAAAGAAGATTATTTCAAAAAAATAGAATGTTTTGATAGTGTTGAAATTTGAGG  
AGTTGAAGATAGATTTAATGCTTCATTAGGTACCTACCATGATTTGCTAAAATTA  
TTAAAGATAAAGATTTTTTGGATAATGAAGAAAATGAAGATATCTTAGAGGATATT  
GTTTTAACATTGACCTTATTTGAAGATAGGGAGATGATTGAGGAAAGACTTAAAA  
CATATGCTCACCTCTTTGATGATAAGGTGATGAAACAGCTTAAACGTCGCCGTTA  
TACTGGTTGGGGACGTTTGTCTCGAAAATTGATTAATGGTATTAGGGATAAGCAA  
TCTGGCAAACAATATTAGATTTTTTGAATCAGATGGTTTTGCCAATCGCAATTT  
TATGCAGCTGATCCATGATGATAGTTTGACATTTAAGAAGACATTCAAAAAGCA  
CAAGTGTCTGGACAAGGCGATAGTTTACATGAACATATTGCAAATTTAGCTGGTA  
GCCCTGCTATTA AAAAAGGTATTTTACAGACTGTAAAAGTTGTTGATGAATTGGT  
CAAAGTAATGGGGCGGCATAAGCCAGAAAATATCGTTATTGAAATGGCACGTGA  
AAATCAGACAACCTCAAAGGGCCAGAAAATTCGCGAGAGCGTATGAAACGAAT  
CGAAGAAGGTATCAAAGAATTAGGAAGTCAGATTCTTAAAGAGCATCCTGTTGA  
AAATACTCAATTGCAAATGAAAAGCTCTATCTCTATTATCTCCAAAATGGAAGA  
GACATGTATGTGGACCAAGAATTAGATATTAATCGTTTAAAGTGATTATGATGTCG  
ATGCCATTGTTCCACAAAGTTTCCTTAAAGACGATTCAATAGACAATAAGGTCTT  
AACGCGTTCTGATAAAAATCGTGGTAAATCGGATAACGTTCCAAGTGAAGAAGT

AGTCAAAAAGATGAAAACTATTGGAGACAACCTTCTAAACGCCAAGTTAATCACT  
CAACGTAAGTTTGATAATTTAACGAAAGCTGAACGTGGAGGTTTGAGTGAACCTTG  
ATAAAGCTGGTTTTATCAAACGCCAATTGGTTGAAACTCGCCAAATCACTAAGCA  
TGTGGCACAAATTTTGGATAGTCGCATGAATACTAAATACGATGAAAATGATAAA  
CTTATTCGAGAGGTTAAAGTGATTACCTTAAATCTAAATTAGTTTCTGACTTCCG  
AAAAGATTTCCAATTCTATAAAGTACGTGAGATTAACAATTACCATCATGCCCAT  
GATGCGTATCTAAATGCCGTGTTGGAACCTGCTTTGATTAAGAAATATCCAAAAC  
TTGAATCGGAGTTTGTCTATGGTGATTATAAAGTTTATGATGTTTCGTAAAATGATT  
GCTAAGTCTGAGCAAGAAATAGGCAAAGCAACCGCAAATATTTCTTTTACTCTA  
ATATCATGAACTTCTTCAAACAGAAATTACACTTGCAAATGGAGAGATTCGCAA  
ACGCCCTCTAATCGAAACTAATGGGGAAACTGGAGAAATTGTCTGGGATAAAGG  
GCGAGATTTTGGCACAGTGCGCAAAGTATTGTCCATGCCCAAGTCAATATTGT  
CAAGAAAACAGAAGTACAGACAGGCGGATTCTCCAAGGAGTCAATTTTACCAA  
AAGAAATTCGGACAAGCTTATTGCTCGTAAAAAAGACTGGGATCCAAAAAATAT  
GGTGGTTTTGATAGTCCAACGGTAGCTTATTTCAGTCCTAGTGGTTGCTAAGGTG  
GAAAAAGGGAAATCGAAGAAGTTAAAATCCGTTAAAGAGTTACTAGGGATCACA  
ATTATGGAAAGAAGTTCCTTTGAAAAAATCCGATTGACTTTTTAGAAAGCTAAAG  
GATATAAGGAAGTTAAAAAAGACTTAATCATTAAACTACCTAAATATAGTCTTTTT  
GAGTTAGAAAACGGTCGTAAACGGATGCTGGCTAGTGCCGGAGAATTACAAAA  
GGAAATGAGCTGGCTCTGCCAAGCAAATATGTGAATTTTTTATATTTAGCTAGTC  
ATTATGAAAAGTTGAAGGGTAGTCCAGAAGATAACGAACAAAAACAATTGTTTGT  
GGAGCAGCATAAGCATTATTTAGATGAGATTATTGAGCAAATCAGTGAATTTTCT  
AAGCGTGTTATTTTAGCAGATGCCAATTTAGATAAAGTTCTTAGTGATATAACA  
AACATAGAGACAAACCAATACGTGAACAAGCAGAAAATATTATTCATTTATTTAC  
GTTGACGAATCTTGGAGCTCCCGCTGCTTTTAAATATTTTGATAACAACATTGAT  
CGTAAACGATATACGTCTACAAAAGAAGTTTTAGATGCCACTCTTATCCATCAAT  
CCATCACTGGTCTTTATGAAACACGCATTGATTTGAGTCAGCTAGGAGGTCCTA  
GGGGAGGTGGCTCAGAAGGTGGCGGATCTGAAGGTGGCTCTGGAACCTAGTATG  
AGCGATAAAATTATTCACCTGACTGACGACAGTTTTGACACGGATGTAICTCAAAG  
CGGACGGGGCGATCCTCGTCGATTTCTGGGCAGAGTGGTGCGGTCCGTGCAAA  
ATGATCGCCCCGATTCTGGATGAAATCGCTGACGAATATCAGGGCAAACCTGACC  
GTTGCAAACCTGAACATCGATCAAACCCTGGCACTGCGCCGAAATATGGCATC  
CGTGGTATCCCGACTCTGCTGCTGTTCAAAAACGGTGAAGTGGCGGCAACCAAA  
GTGGGTGCACTGTCTAAAGGTCAGTTGAAAGAGTTCCTCGACGCTAACCTGGCC  
GGTTCTGGTTCTGGCCATATGCACCATCATCATCATTCTTCTGGTCTGGTGC  
CACGCGGTTCTGGTATGAAAGAAACCGCTGCTGCTAAATTCGAACGCCAGCACA  
TGGACAGCCCAGATCTGGGTACCGACGACGACGACAAGGCCATGGCTGATATC  
GGATCCCATATGAAATGATGCTCGATAAGAAACAGATTCGTGCGATCTTTCTCT  
TTGAGTTTAAAATGGGTGCGCAAAGCGGCGGAGACGACGCGTAATATTAACAACG  
CGTTCGGTCTTGGCACCGCGAACGAGCGTACCGTGCAATGGTGGTTCAAAAAG  
TTTCGCAAAGGCGACGAATCTCTGGAGGACGAAGAGCGTTCTGGCCGCCCGTCT  
CGAGGTTGACAACGACCAGCTGCGTGCAATCATCGAAGCTGATCCGCTGACTA  
CCACCCGCGAAGTTGCTGAAGAACTGAATGTGGATCACTCTACTGTGGTTCCGCC  
ACCTGAAACAGATCGGTAAAGTAAAAAAGTGGACAAATGGGTTCTCATGAAC

TGTCTGAAAACCAGAAAAACCGTCGTTTTCGAAGTTAGCTCCTCTCTGATTCTGCG  
TAACAACAACGAACCGTTCCTGGATCGTATCGTAACCTGTGATGAGAAATGGAT  
TCTGTATGATAACCGTCGCCGCTCTGCTCAGTGGCTGGATCGCGAAGAAGCTCC  
AAAACACTTCCCGAAACCGAATCTGCACCAGAAGAAAGTCATGGTAACCGTATG  
GTGGTCTGCCGCAGGTGTTATCCACTATTCCTTCTGAACCCGGGCGAAACTAT  
CACCAGCGAAAAATACTGCCAGCAGATTGACGAAATGCACCGTAAACTGCAGCG  
TCTGCAGCCAGCACTGGTGAATCGTAAAGGTCCGATCCTGCTGCATGATAACGC  
CCGTCCGCACGTTGCCCAACCGACCCTGCAGAACTGAACGAACTGGGCTATG  
AAGTTCTGCCACACCCGCCGTACTCCCCGGATCTGTCCCCGACTGACTACCATT  
TCTTCAAGCATCTGGACAACCTCCTGCAGGGTAAACGTTTTTCACAACCAACAGG  
ACGCAGAAAACGCTTTCCAGGAGTTCGTGCGAAAGCCGTTCCACTGACTTCTACG  
CGACCGGTATCAACAAGCTGATCAGCCGTTGGCAGAAATGCGTGGACTGTAAC  
GGCAGCTACTTCGATTAAGACGTCTTAATAACTAAAAATATGGTATAATACTCTTA  
ATAAATGCAGTAATACAGGGGCTTTTCAAGACTGAAGTCTAGCTGAGACAAATA  
GTGCGATTACGAAATTTTTAGACAAAATAGTCTACGAGGTTTTAGAGCTATGC  
TGTTTTGAATGGTCCCAAACGGTTTTCCAGTCACGACGTTGTAAAACGAGTTT  
TAGAGCTATGCTGTTTTGAATGGTCCCAAACCTTCAGCACACTGAGACTTGTTGA  
GTTCCATGTTTTAGAGCTATGCTGTTTTGAATGGACTCCATTCAACATTGCCGAT  
GATAACTTGAGAAAGAGGGTTAATACCAGCAGTCGGATACCTTCCTATTCTTTCT  
GTTAAAGCGTTTTTCATGTTATAATAGGCCAAAAGAAGAGTAGTGTGATCGCCGCG  
GATCCTTCTATAGTGTACCTAAATGTGACGGCCAGGCGGCCGCGCCAGGCCTA  
CCCCTAGTCAATTCGGGAGGATCGAAACGGCAGATCGCAAAAACAGTACATA  
CAGAAGGAGACATGAACATGAACATCAAAAAAATTGTAAAACAAGCCACAGTTCT  
GACTTTTACGACTGCACTTCTGGCAGGAGGAGCGACTCAAGCCTTCGCGAAAGA  
AAATAACCAAAAAGCATACAAAGAAACGTACGGCGTCTCTCATATTACAGCCAT  
GATATGCTGCAGATCCCTAAACAGCAGCAAACGAAAAATACCAAGTGCCTCAA  
TTCGATCAATCAACGATTA AAAATATTGAGTCTGCAAAAGGACTTGATGTGTGGG  
ACAGCTGGCCGCTGCAAAACGCTGACGGAACAGTAGCTGAATACAACGGCTAT  
CACGTTGTGTTTGCTCTTGCGGGAAGCCCGAAAGACGCTGATGACACATCAATC  
TACATGTTTTATCAAAGGTTCGGCGACAACCTCAATCGACAGCTGGAAAAACGCG  
GGCCGTGTCTTTAAAGACAGCGATAAGTTCGACGCCAACGATCCGATCCTGAAA  
GATCAGACGCAAGAATGGTCCGGTTCTGCAACCTTTACATCTGACGGAAAAATC  
CGTTTATTCTACACTGACTATTCCGGTAAACATTACGGCAAACAAAGCCTGACAA  
CAGCGCAGGTAAATGTGTCAAATCTGATGACACACTCAAATCAACGGAGTGG  
AAGATCACAAAACGATTTTTGACGGAGACGAAAAACATATCAGAACGTTTCAGC  
AGTTTATCGATGAAGGCAATTATACATCCGGCGACAACCATACGCTGAGAGACC  
CTCACTACGTTGAAGACAAAGGCCATAAATACCTTGTATTGAAAGCCAACACGG  
GAACAGAAAACGGATACCAAGGCCGAAGAATCTTTATTTAACAAAGCGTACTACG  
GCGGCGGCACGAACTTCTCCGTAAAGAAAGCCAGAAGCTTCAGCAGAGCGCT  
AAAAACGCGATGCTGAGTTAGCGAACGGCGCCCTCGGTATCATAGAGTTAAAT  
AATGATTACACATTGAAAAAAGTAATGAAGCCGCTGATCACTTCAAACACGGTAA  
CTGATGAAATCGAGCGCGGAATGTTTTCAAATGAACGGCAAATGGTACTTGT  
TCACTGATTCACGCGGTTCAA AAAATGACGATCGATGGTATTA ACTCAAACGATAT  
TTACATGCTTGGTTATGTATCAA ACTCTTAAACCGGCCCTTACAAGCCGCTGAAC

AAAACAGGGCTTGTGCTGCAAATGGGTCTTGATCCAAACGATGTGACATTCACT  
TACTCTCACTTCGCAGTGCCGCAAGCCAAAGGCAACAATGTGGTTATCACAAGC  
TACATGACAAACAGAGGCTTCTTCGAGGATAAAAAGGCAACATTTGCGCCAAGC  
TTCTTAATGAACATCAAAGGCAATAAAACATCCGTTGTCAAAAACAGCATCCTGG  
AGCAAGGACAGCTGACAGTCAACTAATAACAGCAAAAAGAAAATGCCGATACTT  
CATTGGCATTTCCTTTATTTCTCAACAAGATGGTGAATTGACTAGTGGGTAGAT  
CCACAGGACGGGTGTGGTCGCCATGATCGCGTAGTCGATAGTGGCTCCAAGTA  
GCGAAGCGAGCAGGACTGGGCGGCGGCCAAAGCGGTTCGGACAGTGCTCCGAG  
AACGGGTGCGCATAGAAATTGCATCAACGCATATAGCGCTAGCAGCACGCCATA  
GTGACTGGCGATGCTGTCCGAATGGACGATATCCCGCAAGAGGCCCGGCAGTA  
CCGGCATAACCAAGCCTATGCCTACAGCATCCAGGGTGACGGTGCCGAGGATG  
ACGATGAGCGCATTGTTAGATTTTCATACACGGTGCCTGACTGCGTTAGCAATTTA  
ACTGTGATAAACTACCGCATTAAAGCTTATCGATGATAAGCTGTCAAACATGAGA  
ATTGATCCGGAACCCTTAATATAACTTCGTATAATGTATGCTATACGAAGTTATTA  
GGTCCCTCGACTATAGGGTCACCGTCGACAGCGACACACTTGCATCGGATGCA  
GCCCGGTTAACGTGCCGGCACGGCCTGGGTAAACCAGGTATTTTGTCCACATAA  
CCGTGCGCAAATGTTGTGGATAAGCAGGACACAGCAGCAATCCACAGCAGGC  
ATACAACCGCACACCGAGGTTACTCCGTTCTACAGGTTACGACGACATGTCAAT  
ACTTGCCCTTGACAGGCATTGATGGAATCGTAGTCTCACGCTGATAGTCTGATC  
GACAATACAAGTGGGACCGTGGTCCCAGACCGATAATCAGACCGACAACACGA  
GTGGGATCGTGGTCCCAGACTAATAATCAGACCGACGATACGAGTGGGACCGT  
GGTCCCAGACTAATAATCAGACCGACGATACGAGTGGGACCGTGGTTCCAGAC  
TAATAATCAGACCGACGATACGAGTGGGACCGTGGTCCCAGACTAATAATCAGA  
CCGACGATACGAGTGGGACCATGGTCCCAGACTAATAATCAGACCGACGATAC  
GAGTGGGACCGTGGTCCCAGTCTGATTATCAGACCGACGATACGAGTGGGACC  
GTGGTCCCAGACTAATAATCAGACCGACGATACGAGTGGGACCGTGGTCCCAG  
ACTAATAATCAGACCGACGATACGAGTGGGACCGTGGTCCCAGTCTGATTATCA  
GACCGACGATACAAGTGGAACAGTGGGCCCAGAGAGAATATTCAGGCCAGTTA  
TGCTTTCTGGCCTGTAACAAAGGACATTAAGTAAAGACAGATAAACGTAGACTAA  
AACGTGGTTCGCATCAGGGTGGCTTTTCAAGTTCCTTAAGAATGGCCTCAAT  
TTTCTCTATACACTCAGTTGGAACACGAGACCTGTCCAGGTTAAGCACCATTTTA  
TCGCCCTTATACAATACTGTGCTCCAGGAGCAAACCTGATGTCGTGAGCTTAAA  
CTAGTTCTTGATGCAGATGACGTTTTAAGCACAGAAGTTAAAAGAGTGATAACTT  
CTTCAGCTTCAAATATCACCCAGCTTTTTTCTGCTCATGAAGGTTAGATGCCTG  
CTGCTTAAGTAATTCCTCTTTATCTGTAAAGGCTTTTTGAAGTGCATCACCTGAC  
CGGGCAGATAGTTCACCGGGGTGAGAAAAAAGAGCAACAACCTGATTTAGGCAAT  
TTGGCGGTGTTGATACAGCGGGTAATAATCTTACGTGAAATATTTTCCGCATCAG  
CCAGCGCAGAAATATTTCCAGCAAATTCATTCTGCAATCGGCTTGCATAACGCT  
GACCACGTTTATAAGCACTTGTGGGCGATAATCGTTACCCAATCTGGATAATG  
CAGCCATCTGCTCATCATCCAGCTCGCCAACCAGAACACGATAATCACTTTCCG  
TAAGTGCAGCAGCTTACGACGGCGACTCCCATCGGCAATTTCTATGACACCAG  
ATACTCTTCGACCGAACGCCGGTGTCTGTTGACCAGTCAGTAGAAAAGAAGGGA  
TGAGATCATCCAGTGCGTCCTCAGTAAGCAGCTCCTGGTCACGTTTATTACCTG  
ACCATACCCGAGAGGTCTTCTCAACACTATCACCCCGGAGCACTTCAAGAGTAA

ACTTCACATCCCGACCACATACAGGCAAAGTAATGGCATTACCGCGAGCCATTA  
CTCCTACGCGCGCAATTAACGAATCCACCATCGGGGCAGCTGGTGTGATAAC  
GAAGTATCTTCAACCGGTTGAGTATTGAGCGTATGTTTTGGAATAACAGGCGCA  
CGCTTCATTATCTAATCTCCCAGCGTGGTTTAATCAGACGATCGAAAATTTTCATT  
GCAGACAGGTTCCCAAATAGAAAGAGCATTCTCCAGGCACCAGTTGAAGAGCG  
TTGATCAATGGCCTGTTCAAAAACAGTTCTCATCCGGATCTGACCTTTACCAACT  
TCATCCGTTTCACGTACAACATTTTTTTAGAACCATGCTTCCCCAGGCATCCCGAA  
TTTGCTCCTCCATCCACGGGGACTGAGAGCCATTACTATTGCTGTATTTGGTAA  
GCAAATACGTACATCAGGCTCGAACCCTTTAAGATCAACGTTCTTGAGCAGAT  
CACGAAGCATATCGAAAACTGCAGTGC GGAGGTGTAGTCAAACA ACTCAGCAG  
GCGTGGGAACAATCAGCACATCAGCAGCACATACGACATTAATCGTGCCGATAC  
CCAGGTTAGGCGCGCTGTCAATAACTATGACATCATAGTCATGAGCAACAGTTT  
CAATGGCCAGTCGGAGCATCAGGTGTGGATCGGTGGGCAGTTTACCTTCATCAA  
ATTTGCCCATTA ACTCAGTTTCAATACGGTGCAGAGCCAGACAGGAAGGAATAA  
TGTCAAGCCCCGGCCAGCAAGTGGGCTTTATTGCATAAGTGACATCGTCCTTTT  
CCCCAAGATAGAAAGGCAGGAGAGTGTCTTCTGCATGAATATGAAGATCTGGTA  
CCCATCCGTGATACATTGAGGCTGTTCCCTGGGGGTGCTTACCTTCCACGAGCA  
AAACACGTAGCCCCTTCAGAGCCAGATCCTGAGCAAGATGAACAGAACTGAG  
GTTTTGTAAACGCCACCTTTATGGGCAGCAACCCCGATCACCGGTGGAAATACG  
TCTTCAGCACGTTCGCAATCGCGTACCAAACACATCACGCATATGATTAATTTGTT  
CAATTGTATAACCAACACGTTGCTCAACCCGTCTCGAATTTCCATATCCGGGTG  
CGGTAGTCGCCCTGCTTTCTCGGCATCTCTGATAGCCTGAGAAGAAACCCCAAC  
TAAATCCGCTGCTTACCTATTCTCCAGCGCCGGGTTATTTTCTCGCTTCCGG  
GCTGTCATCATTA ACTGTGCAATGGCGATAGCCTTCGTCATTTTCATGACCAGC  
GTTTATGCACTGGTTAAGTGTTCATGAGTTTCATTCTGAACATCCTTTAATCAT  
TGCTTTGCGTTTTTTTTATTAAATCTTGCAATTTACTGCAAAGCAACAACAAAATCG  
CAAAGTCATCAAAAACCGCAAAGTTGTTTAAAATAAGAGCAACACTACAAAAGG  
AGATAAGAAGAGCACATACCTCAGTCACTTATTATCACTAGCGCTCGCCGCAGC  
CGTGTAACCGAGCATAGCGAGCGAACTGGCGAGGAAGCAAAGAAGAACTGTTT  
TGTCAGATAGCTCTTACGCTCAGCGCAAGAAGAAATATCCACCGTGGGAAAAC  
TCCAGGTAGAGGTACACACGCGGATAGCCAATTCAGAGTAATAAACTGTGATAA  
TCAACCCTCATCAATGATGACGAACTAACCCCGATATCAGGTCACATGACGAA  
GGGAAAGAGAAGGAAATCAACTGTGACAACTGCCCTCAAATTTGGCTTCCTTA  
AAAATTACAGTTCAAAAAGTATGAGAAAATCCATGCAGGCTGAAGGAAACAGCA  
AACTGTGACAAATTACCCTCAGTAGGTCAGAACAATGTGACGAACCACCCTC  
AAATCTGTGACAGATAACCCTCAGACTATCCTGTGTCATGGAAGTGATATCGC  
GGAAGGAAAATACGATATGAGTCGTCTGGCGGCCTTTCTTTTTCTCAATGTATGA  
GAGGCGCATTGGAGTTCTGCTGTTGATCTCATTAAACACAGACCTGCAGGAAGCG  
GCGGCGGAAGTCAGGCATACGCTGGTAACTTTGAGGCAGCTGGTAAACGCTCTA  
TGATCCAGTCGATTTTCAGAGAGACGATGCCTGAGCCATCCGGCTTACGATACT  
GACACAGGGATTTCGTATAAACGCATGGCATAACGGATTGGTGATTTCTTTTGTTC  
ACTAAGCCGAACTGCGTAAACCGGTTCTGTAACCCGATAAAGAAGGGAATGAG  
ATATGGGTTGATATGTACACTGTAAAGCCCTCTGGATGGACTGTGCGCACGTTT  
GATAAACCAAGGAAAAGATTCATAGCCTTTTTTCATCGCCGGCATCCTCTTCAGG



GCGATAAAAAACCACTTCCTTCCCCGCGAAACTCTTCAATGCCTGCCGTATATC  
CTTACTGGCTTCCGCAGAGGTCAATCCGAATATTTAGCATATTTAGCAACATGG  
ATCTCGCAGATACCGTCATGTTCTGTAGGGTGCCATCAGATTTTCTGATCTGGT  
CAACGAACAGATACAGCATAACGTTTTTATCCCGGGAGAGACTATATGCCGCCT  
CAGTGAGGTCGTTTACTGGACGATTCGCGGGCTATTTTACGTTTCTTGTGATT  
GATAACCGCTGTTTCCGCCATGACAGATCCATGTGAAGTGTGACAAGTTTTTAG  
ATTGTCACACTAAATAAAAAAGAGTCAATAAGCAGGGATAACTTTGTGAAAAAC  
AGCTTCTTCTGAGGGCAATTTGTCACAGGGTTAAGGGCAATTTGTCACAGACAG  
GACTGTCATTTGAGGGTGATTTGTCACACTGAAAGGGCAATTTGTCACAACACC  
TTCTCTAGAACCAGCATGGATAAAGGCCTACAAGGCGCTCTAAAAAGAAGATC  
TAAAAACTATAAAAAAATAATTATAAAAAATATCCCGGTGGATAAGTGGATAACC  
CCAAGGGAAGTTTTTTCAGGCATCGTGTGTAAGCAGAATATAAAGTGCTGTTCC  
CTGGTGCTTCCCTCGCTCACTCGAGGGCTTCGCCCTGTCGCTCAACTGCGGGCA  
GCACTACTGGCTGTAAAAGGACAGACCACATCATGGTTCTGTGTTTATTAGGTT  
GTTCTGTCCATTGCTGACATAATCCGCTCCACTTCAACGTAACACCGCACGAAG  
ATTTCTATTGTTCTGAAGGCATATTCAAATCGTTTTCGTTACCGCTTGCAGGCA  
TCATGACAGAACACTACTTCTATAAACGCTACACAGGCTCCTGAGATTAATAAT  
GCGGATCTCTACGATAATGGGAGATTTTCCCGACTGTTTCGTTTCGCTTCTCAGT  
GGATAACAGCCAGCTTCTCTGTTTAAACAGACAAAAACAGCATATCCACTCAGTTC  
CACATTTCCATATAAAGGCCAAGGCATTTATTCTCAGGATAATTGTTTCAGCATC  
GCAACCGCATCAGACTCCGGCATCGAAACTGCACCCGGTGCCGGGCAGCCAC  
ATCCAGCGCAAAAACCTTCGTGTAGACTTCCGTTGAACTGATGGACTTATGTCC  
CATCAGGCTTTGCAGAACTTTAGCGGTATACCGGCATACAGCATGTGCATCGC  
ATAGGAATGGCGGAACGTATGTGGTGTGACCGGAACAGAGAACGTCACACCGT  
CAGCAGCAGCGGCGGCAACCGCCTCCCAATCCAGGTCCTGACCGTTCTGTCC  
GTCACTTCCCAGATCCGCGC

pRC2312

GGTCGGGCTGAACGGGGGGTTCGTGCACACAGCCCAGCTTGGAGCGAACGAC  
CTACACCGAACTGAGATACCTACAGCGTGAGCTATGAGAAAGCGCCACGCTTCC  
CGAAGGGAGAAAGGCGGACAGGTATCCGGTAAGCGGCAGGGTTCGGAACAGGA  
GAGCGCACGAGGGAGCTTCCAGGGGGAAACGCCTGGTATCTTTATAGTCCTGT  
CGGGTTTCGCCACCTCTGACTTGAGCGTCGATTTTTGTGATGCTCGTCAGGGGG  
GCGGAGCCTATGGAAAAACGCCAGCAACGCGGCCTTTTTACGGTTCCTGGCCT  
TTTGCTGGCCTTTTGCTCACATGTTCTTTCCTGCGTTATCCCCTGATTCTGTGGA  
TAACCGTATTACCGCCTTTGAGTGAGCTGATACCGCTCGCCGCAGCCGAACGAC  
CGAGCGCAGCGAGTCAGTGAGCGAGGAAGCGGAAGAGCGCCCAATACGCAAA  
CCGCCTTCCCCGCGCGTTGGCCGATTCATTAATGCAGCTGGCAGCAGAGGTT  
TCCCGACTGGAAAGCGGGCAGTGAGCGCAACGCAATTAATGTGAGTTAGCTCA  
CTCATTAGGCACCCAGGCTTTACACTTTATGCTTCCGGCTCGTATGTTGTGTG  
GAATTGTGAGCGGATAACAATTTACACAGGAAACAGCTATGACCATGATTACG  
CCAAGCGCGCAATTAACCCTCACTAAAGGGGAACAAAAGCTGGAGCTCCACCGC  
GGTGGCGGCGCTCTAGAAGTAGTGGATCCCCCGGGCTGCAGGAATTCGATAT

CAAGCTTATCGATACCGTCGACCTCGAGGGGGGGCCCGGTACCCAATTCGCCC  
TATAGTGAGTCGTATTACGCGCGCTCACTGGCCGTCGTTTTACAACGTCGTGAC  
TGGGAAAACCCCTGGCGTTACCCAACCTTAATCGCCTTGCAGCACATCCCCCTTTC  
GCCAGCTGGCGTAATAGCGAAGAGGCCCGCACCGATCGCCCTTCCAACAGTT  
GCGCAGCCTGAATGGCGAATGGGACGCGCCCTGTAGCGGCGCATTAAAGCGCG  
GCGGGTGTGGTGGTTACGCGCAGCGTGACCGCTACACTTGCCAGCGCCCTAGC  
GCCCGCTCCTTTTCGCTTTCTTCCCTTCTTTCTCGCCACGTTTCGCCGGCTTTCC  
CCGTCAAGCTCTAAATCGGGGGCTCCCTTTAGGGTTCCGATTTAGTGCTTTACG  
GCACCTCGACCCCAAAAACTTGATTAGGGTGATGGTTCACGTAGTGCAATTTA  
GGTGGCACTTTTCGGGGAAATGTGCGCGGAACCCCTATTTGTTATTTTTCTAAA  
TACATTCAAATATGTATCCGCTCATGAGACAATAACCCTGATAAATGCTTCAATA  
ATATTGAAAAGGAAGAGTATGAGTATTCAACATTTCCGTGTCGCCCTTATTCCC  
TTTTTTGCGGCATTTTGCTTCCCTGTTTTTGCTCACCCAGAAACGCTGGTGAAG  
TAAAAGATGCTGAAGATCAGTTGGGTGCACGAGTGGGTACATCGAACTGGATC  
TCAACAGCGGTAAGATCCTTGAGAGTTTTCGCCCCGAAGAACGTTTTCCAATGA  
TGAGCACTTTTAAAGTTCTGCTATGTGGCGCGGTATTATCCCGTATTGACGCCG  
GGCAAGAGCAACTCGGTCGCCGCATACACTATTCTCAGAATGACTTGGTTGAGT  
ACTCACCAGTCACAGAAAAGCATCTTACGGATGGCATGACAGTAAGAGAATTAT  
GCAGTGCTGCCATAACCATGAGTGATAACACTGCGGCCAACTTACTTCTGACAA  
CGATCGGAGGACCGAAGGAGCTAACCGCTTTTTTGACAACATGGGGGATCAT  
GTAACCTCGCCTTGATCGTTGGGAACCGGAGCTGAATGAAGCCATACCAAACGAC  
GAGCGTGACACCACGATGCCTGTAGCAATGGCAACAACGTTGCGCAAACCTATTA  
ACTGGCGAACTACTTACTCTAGCTTCCCGGCAACAATTAATAGACTGGATGGAG  
GCGGATAAAGTTGCAGGACCCTTCTGCGCTCGGCCCTTCCGGCTGGCTGGTT  
TATTGCTGATAAATCTGGAGCCGGTGAGCGTGGGTCTCGCGGTATCATTGCAGC  
ACTGGGGCCAGATGGTAAGCCCTCCCGTATCGTAGTTATCTACACGACGGGGA  
GTCAGGCAACTATGGATGAACGAAATAGACAGATCGCTGAGATAGGTGCCTCAC  
TGATTAAGCATTGGTAACTGTCAGACCAAGTTTACTCATATATACTTTAGATTGAT  
TTAAAACCTTCATTTTTAATTTAAAAGGATCTAGGTGAAGATCCTTTTTGATAATCT  
CATGACCAAAATCCCTTAACGTGAGTTTTCGTTCCACTGAGCGTCAGACCCCGT  
AGAAAAGATCAAAGGATCTTCTTGAGATCCTTTTTTTCTGCGCGTAATCTGCTGC  
TTGCAAACAAAAAAACCACCGCTACCAGCGGTGGTTTGTGTTGCCGGATCAAGAG  
CTACCAACTCTTTTTCCGAAGGTAACCTGGCTTCAGCAGAGCGCAGATACCAAT  
ACTGTCTTCTAGTGTAGCCGTAGTTAGGCCACCACTTCAAGAACTCTGTAGCA  
CCGCCTACATACCTCGCTCTGCTAATCCTGTTACCAGTGGCTGCTGCCAGTGGC  
GATAAGTCGTGTCTTACCGGGTTGGACTCAAGACGATAGTTACCGGATAAGGCG  
CAGCGGTCGGGCTGAACGGGGGGTTCGTGCACACAGCCCAGCTTGGAGCGAA  
CGACCTACACCGAACTGAGATACCTACAGCGTGAGCTATGAGAAAGCGCCACG  
CTTCCCGAAGGGAGAAAGGCGGACAGGTATCCGGTAAGCGGCAGGGTCCGGAA  
CAGGAGAGCGCACGAGGGAGCTTCCAGGGGGAAACGCCTGGTATCTTTATAGT  
CCTGTGCGGTTTTCGCCACCTCTGACTTGAAGCGTCGATTTTTGTGATGCTCGTCA  
GGGGGGCGGAGCCTATGGAAAAACGCCAGCAACGCGGCCTTTTTACGGTTCCT  
GGCCTTTTGCTTATAAGGGATTTTGCCGATTTCCGGCCTATTGGTTAAAAAATGAG  
CTGATTTAACAAAAATTTAACGCGAATTTAACAAAAATTTAACGCTTACAATTTA

GGTGGCACTTTTCGGGGAAATGTGCGCGGAACCCCTATTTGTTTATTTTTCTAAA  
TACATTCAAATATGTATCCGCTCATGAGACAATAACCCTGATAAATGCTTCAATA  
ATATTGAAAAGGAAGAGTATGAGTATTCAACATTTCCGTGTCGCCCTTATTCCC  
TTTTTTGCGGCATTTTGCCTTCCTGTTTTTGTCTACCCAGAAACGCTGGTGAAAG  
TAAAAGATGCTGAAGATCAGTTGGGTGCACGAGTGGGTACATCGAACTGGATC  
TCAACAGCGGTAAGATCCTTGAGAGTTTTCGCCCCGAAGAACGTTTTCCAATGA  
TGAGCACTTTTAAAGTTCTGCTATGTGGCGCGGTATTATCCCGTATTGACGCCG  
GGCAAGAGCAACTCGGTGCGCCGATACACTATTCTCAGAATGACTTGGTTGAGT  
ACTCACCAGTCACAGAAAAGCATCTTACGGATGGCATGACAGTAAGAGAATTAT  
GCAGTGCTGCCATAACCATGAGTGATAACACTGCGGCCAACTTACTTCTGACAA  
CGATCGGAGGACCGAAGGAGCTAACCGCTTTTTTGCACAACATGGGGGATCAT  
GTA ACTCGCCTTGATCGTTGGGAACCGGAGCTGAATGAAGCCATACCAAACGAC  
GAGCGTGACACCACGATGCCTGTAGCAATGGCAACAACGTTGCGCAAACCTATTA  
ACTGGCGAACTACTTACTCTAGCTTCCCGGCAACAATTAATAGACTGGATGGAG  
GCGGATAAAGTTGCAGGACCACTTCTGCGCTCGGCCCTTCCGGCTGGCTGGTT  
TATTGCTGATAAATCTGGAGCCGGTGAGCGTGGGTCTCGCGGTATCATTGCAGC  
ACTGGGGCCAGATGGTAAGCCCTCCCGTATCGTAGTTATCTACACGACGGGGA  
GTCAGGCAACTATGGATGAACGAAATAGACAGATCGCTGAGATAGGTGCCTCAC  
TGATTAAGCATTGGTAACTGTCAGACCAAGTTTACTCATATATACTTTAGATTGAT  
TTAAAACCTTCATTTTTAATTTAAAAGGATCTAGGTGAAGATCCTTTTTGATAATCT  
CATGACCAAATCCCTTAACGTGAGTTTTCGTCCACTGAGCGTCAGACCCCGT  
AGAAAAGATCAAAGGATCTTCTTGAGATCCTTTTTTCTGCGCGTAATCTGCTGC  
TTGCAAACAAAAAACCACCGCTACCAGCGGTGGTTTGTGGCCGGATCAAGAG  
CTACCAACTCTTTTTCCGAAGGTA ACTGGCTTCAGCAGAGCGCAGATACCAAAT  
ACTGTCCTTCTAGTGTAGCCGTAGTTAGGCCACCACTTCAAGAACTCTGTAGCA  
CCGCCTACATACCTCGCTCTGCTAATCCTGTTACCAGTGGCTGCTGCCAGTGGC  
GATAAGTCGTGTCTTACCGGGTTGGACTCAAGACGATAGTTACCGGATAAGGCG  
CAGC

pRC2313

GGTCGGGCTGAACGGGGGGTTCGTGCACACAGCCCAGCTTGGAGCGAACGAC  
CTACACCGAACTGAGATACCTACAGCGTGAGCTATGAGAAAGCGCCACGCTTCC  
CGAAGGGAGAAAGGCGGACAGGTATCCGGTAAGCGGCAGGGTTCGGAACAGGA  
GAGCGCACGAGGGAGCTTCCAGGGGGAAACGCCTGGTATCTTTATAGTCCTGT  
CGGGTTTTCGCCACCTCTGACTTGAGCGTCGATTTTTGTGATGCTCGTCAGGGGG  
GCGGAGCCTATGGAAAACGCCAGCAACGCGGCCTTTTTACGGTTCCTGGCCT  
TTTGCTGGCCTTTTGCTCACATGTGGCCTACGTTTTAATGCCAGCAAAAATGGTG  
AATTACCTGGATAATCAACTCACGGGTGGGTTTAATAAACCGCGTCTCCAGATAT  
TCATCAGGCTGATGAGCTTGATTGATGGAACCCGGACCGAGCACCAGCGTAGG  
GCATAACGTTTGAATAAACGGCGCTTCGGTACAGTAATTCACCACTTCGGTTTTT  
GCTCCGAGCAATTTCTCAACCACTTCAACCAGTTGATGATTCGGTGGGCATTCA  
TAGCCAGGGATCGGCGGATGCAGCTCGTCGACCGTCAGACGACCCGGCCAGC  
GTTGCTCACCGGAGCCAATGCATCGTTGAGCAAACCATTAAGTTCATTGAGTG

TCATGCCAGGCAGCGGACGAATATCCATATGCAACTCACAGCAAGCGCAAATAC  
GGTTAGAAGCGTCGCCACCGTGAATATGCCCGAGGTTGAGCGTAGGGTATGGC  
ACGGTAAACGCTTCGTAGTGATAACGTTCTTTCAGGTTATCGCGCAATTGCAAAA  
TATGCCCGATGGCGTCGTGCATTAGTTCGATAGCGTTAACTCCGCGTGCTGGAT  
CGCTGGAGTGCCCCGACTGGCCCTGAATACGGATGGCGTTAGAGATATGACCT  
TTATGTGCGCGTACCGGTTGTAGTGACGTGCGTTTCGCCAATGATGGCGCAATCC  
GGGCGCAGGGCGGTAGTTTCGGCAAATAACGCGCTCCGGCCATACTGGTTTC  
TTCATCAGCAGTCGCCAGAATGTAGAGCGGTTTTTTCAGTTTCGTGACGTGAC  
ATCGCGTAGCGCATCAAGGATAAACGCAAAAAAGCCTTTCATGTGCGCGGTGCC  
TAAGCCGTAAAGCTTGCCGTCATGCTCCGTCAGTGTAACGGATCGCGCGTCCA  
GCGACCGTCATCAAATGGCACCGTATCGGTATGCCCCGCCAGCAACAAGCCGC  
CAGCCCCCTGTCCGATACTTGCCAGCATATTGAATTTGTTGCGAGTTCCTGGAA  
CAGGCTGCACTTCCACATTGAAGCCCAAATCTTTAAACCAGTCCGCCAGCAGAG  
TAATTAATCTGCATTGCTTTGATCGAGTGCCTCTTCCGTGGCGCTTATTGAAGG  
TGTGGCAATCAGAGCGCGGTAAATCTCGATAAATGGCGGTAATTTGTTTTTCATT  
GTTGACACACCTCTGGTCATGATAGTATCAATATTCATGCAGTATTTATGAATAA  
AAATACACTAACGTTGAGCGTAATAAAACCCACCAGCCGTAAGGTGAATGTTTTA  
CGTTTAACTGGCAACCAGACATAAGAAGGTGAATAGCCCCGATGTTGAATACG  
CTGATTGTGGGTGCCAGCGGCTACGCTGGCGCAGAGCTAGTGACCTATGTAAA  
TCGCCATCCGCATATGAACATAACCGCTTTGACTGTTTCAGCGCAAAGCAATGA  
TGCGGGAAAGTTAATCTCCGATTTGCATCCGCAGCTAAAAGGCATCGTTGATCT  
GCCGTTGCAGCCGATGTCGGATATCAGCGAGTTTAGCCCAGGGGTGGACGTAG  
TGTTTCTCGCCACCGCCCATGAAGTTAGCCACGATTTAGCGCCGCAGTTTCTTG  
AAGCGGGCTGCGTGGTGTTCGACCTTTCGGCGCGTTCGTGTTAACGACGCC  
ACCTTCTATGAAAAATATTACGGCTTTACCCATCAATACCCGGAAGTGTGGAAC  
AGGCAGCCTACGGTCTGGCGGAGTGGTGCGGTAATAAATTAAGAAGCGAAT  
TTGATTGCGGTGCCGGGCTGTTATCCGACGGCGGCACAGCTGGCGCTGAAACC  
GTTGATTGATGCCGATCTTCTTGACCTCAATCAGTGGCCGGTGATCAACGCCAC  
CAGCGGCGTGAGCGGTGCAGGGCGTAAAGCGGCCATTTCAAACAGCTTTTGTG  
AAGTTAGCCTGCAACCGTATGGCGTCTTTACTCATCGCCATCAACCAGAGATCG  
CCACACACCTCGGTGCTGACGTTATCTTCACCCACATCTGGGCAATTTCCCGC  
GCGGCATTCTCGAAACCATTACCTGCCGCCTGAAATCGGGTGTGACCCAGGCG  
CAAGTCGCGCAAGTGTTACAGCAGGCGTATGCCATAAACCGCTGGTGCGGCT  
GTATGACAAAGGCGTTCCGGCGCTGAAAAATGTCGTTGGGCTGCCATTTTGCGA  
TATCGGGTTTGCCGTTCAGGGCGAGCATCTGATTATTGTGGCGACCGAAGACAA  
CTTACTGAAAGGCGCGGCGGCACAAGCGGTACAGTGCGCCAATATTCGTTTCG  
GCTATGCGGAAACGCAGTCTCTTATTTAAGGGTGAATGATGAATCCATTAATTA  
TCAAACCTGGGCGGCGTACTGCTGGATAGTGAAGAGGCGCTGGAACGTCTGTTT  
AGCGCACTGGTGAATTATCGTGAGTCACATCAGCGTCCGCTGGTGATTGTGCAC  
GGCGGCGGTTGCGTGGTGGATGAGCTGATGAAAGGGCTGAATCTGCCGGTGAA  
AAAGAAAAATGGCCTGCGGGTGACGCCTGCGGATCAGATAGACATTATCACCG  
GAGCACTGGCGGGAACGGCAAATAAAACCCTGTTGGCATGGGCGAAGAAACAT  
CAGATTGCGGCCGTAGGTTTGTCTCGGTGACGGCGACAGCGTCAAAGTGAC  
CCAGCTTGATGAAGAGTTAGGCCATGTTGGACTGGCGCAGCCAGGTTTCGCCTA

AGCTTATCAACTCCTTGCTGGAGAACGGTTATCTGCCGGTGGTCAGCTCCATTG  
GCGTAACAGACGAAGGGCAACTGATGAACGTCAATGCCGACCAGGCGGCAACG  
GCGCTGGCGGCAACGCTGGGCGCGGATCTGATTTTGCTCTCCGACGTCAGCGG  
CATTCTCGACGGCAAAGGGCAACGCATTGCCGAAATGACCGCCGCGAAAGCAG  
ACAACCTGATTGAGCAGGGCATTACTGACGGCATGATAGTGAAAGTGAACG  
CGGCGCTGGATGCGGCCCGCACGCTGGGCCGTCCGGTAGATATCGCCTCCTG  
GCGTCATGCGGAGCAGCTTCCGGCACTGTTTAACGGTATGCCGATGGGTACGC  
GGATTTTAGCTTAAGTTTTGTTGGCCGGAGGCGCAGCTTCCGGCATTGAATTT  
CAAATAAGGAAACAGAGTTATGGCACTTTGGGGCGGGCGTTTTACCCAGGCA  
GCAGATCAACGGTTCAAACAATCAACGACTCACTGCGCTTTGATTACCGTCTG  
GCGGAGCAGGATATTGTTGGCTCTGTGGCCTGGTCCAAAGCCCTGGTCACGGT  
AGGCGTGTTAACCGCAGAAGAGCAGGCGCAACTGGAAGAGGCGCTGAACGTGT  
TGCTGGAAGATGTTCCGCGCCAGGCCACAACAAATCCTTGAAAGCGACGCCGAA  
GATATCCATAGCTGGGTGGAAGGCAAACCTGATCGACAAAGTGGGCCAGTTAGG  
CAAAAAGCTGCATACCGGGCGTAGCCGTAATGATCAGGTAGCGACTGACCTGA  
AACTGTGGTGCAAAGATACCGTTAGCGAGTTACTGACGGCTAACCGGCAGCTG  
CAATCGGCGCTGGTGGAAACCGCACAAAACAATCAGGACGCGGTAATGCCAGG  
TTACACTCACCTGCAACGCGCCAGCCGGTGACGTTCCGCGCACTGGTGCCTGG  
CCTATGTTGAGATGCTGGCGCGTGATGAAAGCCGTTTGCAGGATGCGCTTAAGC  
GTCTGGATGTCAGCCCGCTAGGCTGTGGCGCGCTGGCGGGAACGGCCTATGAA  
ATCGACCGTGAACAGTTAGCAGGCTGGCTGGGCTTTGCTTCCGGCGACCCGTAA  
CAGTCTCGACAGCGTTTCTGACCGTGACCATGTGTTGGAACCTGCTTTCTGCTGC  
CGCTATCGGCATGGTGCATCTGTCGCGTTTTGCTGAAGATCTGATTTTCTTTAAC  
ACCGGCGAAGCGGGGTTTTGTGGAGCTTTCTGACCGCGTGACTTCCGGTTCATC  
ATTAATGCCGCGAGAAGAAAACCCGGATGCGCTGGAGCTGATTCGCGGTAAT  
GCGGCCGGGTGCAGGGGGCGTTAACCGGCATGATGATGACGCTGAAAGGTTT  
GCCGCTGGCTTACAACAAAGATATGCAGGAAGACAAAGAAGGTCTGTTCCGACG  
CGCTCGATACCTGGCTGGACTGCCTGCATATGGCGGCGCTGGTGTGACGGC  
ATTCAGGTGAAACGTCCACGTTGCCAGGAAGCGGCTCAGCAGGGTTACGCCAA  
CGCCACCGAACTGGCGGATTATCTGGTGGCGAAAGGCGTACCGTTCGCGGAGG  
CGCACCATATTGTTGGTGAAGCGGTGGTGGAAAGCCATTCGTCAGGGCAAACCG  
CTGGAAGATCTGCCGCTCAGTGAGTTGCAGAAATTCAGTCAGGTGATTGACGAA  
GATGTCTATCCGATTCTGTCGCTGCAATCGTGCCTCGACAAGACATGTTCTTTCC  
TGCGTTATCCCCTGATTCTGTGGATAACCGTATTACCGCCTTTGAGTGAGCTGAT  
ACCGCTCGCCGCGAGCCGAACGACCGAGCGCAGCGAGTCAGTGAGCGAGGAAG  
CGGAAGAGCGCCAATACGCAAACCGCCTCTCCCCGCGCGTTGGCCGATTCAT  
TAATGCAGCTGGCACGACAGGTTTCCCGACTGGAAAGCGGGCAGTGAGCGCAA  
CGCAATTAATGTGAGTTAGCTCACTCATTAGGCACCCCAGGCTTTACACTTTATG  
CTTCCGGCTCGTATGTTGTGTGGAATTGTGAGCGGATAACAATTCACACAGGA  
AACAGCTATGACCATGATTACGCCAAGCGCGCAATTAACCCTCACTAAAGGGAA  
CAAAGCTGGAGCTCCACCGCGGTGGCCGGCCGCTCTAGAAGTGTGGATCCCC  
CGGGCTGCAGGAATTCGATATCAAGCTTATCGATACCGTCGACCTCGAGGGGG  
GGCCCGGTACCCAATTCGCCCTATAGTGAGTCGTATTACGCGCGCTCACTGGC  
CGTCGTTTTACAACGTCGTGACTGGGAAAACCCTGGCGTTACCCAATTAATCG

CCTTGCAGCACATCCCCCTTTTCGCCAGCTGGCGTAATAGCGAAGAGGCCCGCA  
CCGATCGCCCTTCCCAACAGTTGCGCAGCCTGAATGGCGAATGGGACGCGCCC  
TGTAGCGGCGCATTAAAGCGCGGGGTGTGGTGGTTACGCGCAGCGTGACCG  
CTACACTTGCCAGCGCCCTAGCGCCCGCTCCTTTTCGCTTTCTTCCCTTCTTTCT  
CGCCACGTTTCGCCGGCTTTCCCGTCAAGCTCTAAATCGGGGGCTCCCTTTAG  
GGTTCCGATTTAGTGCTTTACGGCACCTCGACCCCAAAAACTTGATTAGGGTG  
ATGGTTCACGTAGTGCAATTTAGGTGGCACTTTTTCGGGGAAATGTGCGCGGAAC  
CCCTATTTGTTTATTTTTCTAAATACATTCAAATATGTATCCGCTCATGAGACAAT  
AACCTGATAAATGCTTCAATAATATTGAAAAAGGAAGAGTATGAGTATTCAACA  
TTCCGTGTCGCCCTTATTCCCTTTTTTTCGGCATTTTGCCTTCTGTTTTTGCTC  
ACCCAGAAACGCTGGTGAAAGTAAAAGATGCTGAAGATCAGTTGGGTGCACGA  
GTGGGTTACATCGAACTGGATCTCAACAGCGGTAAGATCCTTGAGAGTTTTTCGC  
CCCGAAGAACGTTTTCCAATGATGAGCACTTTTAAAGTTCTGCTATGTGGCGCG  
GTATTATCCCGTATTGACGCCGGGCAAGAGCAACTCGGTGCGCCGCATACACTAT  
TCTCAGAATGACTTGGTTGAGTACTACCAGTCACAGAAAAGCATCTTACGGAT  
GGCATGACAGTAAGAGAATTATGCAGTGCTGCCATAACCATGAGTGATAACACT  
GCGGCCAACTTACTTCTGACAACGATCGGAGGACCGAAGGAGCTAACCGTTTTT  
TTGCACAACATGGGGGATCATGTAACCTCGCCTTGATCGTTGGGAACCGGAGCTG  
AATGAAGCCATACCAAACGACGAGCGTGACACCACGATGCCTGTAGCAATGGC  
AACAACTGTTGCGCAAACCTATTAACCTGGCGAACTACTTACTCTAGCTTCCCGGCA  
ACAATTAATAGACTGGATGGAGGCGGATAAAGTTGCAGGACCACTTCTGCGCTC  
GGCCCTTCCGGCTGGCTGGTTTATTGCTGATAAATCTGGAGCCGGTGAGCGTG  
GGTCTCGCGGTATCATTGCAGCACTGGGGCCAGATGGTAAGCCCTCCCGTATC  
GTAGTTATCTACACGACGGGGAGTCAGGCAACTATGGATGAACGAAATAGACAG  
ATCGCTGAGATAGGTGCCTCACTGATTAAGCATTGGTAACCTGTCAGACCAAGTT  
TACTCATATATACTTTAGATTGATTTAAAACCTTCATTTTTAATTTAAAAGGATCTAG  
GTGAAGATCCTTTTTGATAATCTCATGACCAAATCCCTTAACGTGAGTTTTTCGT  
TCCACTGAGCGTCAGACCCCGTAGAAAAGATCAAAGGATCTTCTTGAGATCCTT  
TTTTTCTGCGCGTAATCTGCTGCTTGCAAACAAAAAACCACCGCTACCAGCGG  
TGGTTTGTGGCCGATCAAGAGCTACCAAACCTTTTTCCGAAGGTAACCTGGCTT  
CAGCAGAGCGCAGATACCAAATACTGTCCTTCTAGTGTAGCCGTAGTTAGGCCA  
CCACTTCAAGAACTCTGTAGCACCGCCTACATACCTCGCTCTGCTAATCCTGTTA  
CCAGTGGCTGCTGCCAGTGGCGATAAGTCGTGTCTTACCGGGTTGGACTCAAG  
ACGATAGTTACCGGATAAGGCGCAGCGGTTCGGGCTGAACGGGGGGTTTCGTGC  
ACACAGCCCAGCTTGGAGCGAACGACCTACACCGAACTGAGATACCTACAGCG  
TGAGCTATGAGAAAGCGCCACGCTTCCCGAAGGGAGAAAGGCGGACAGGTATC  
CGGTAAGCGGCAGGGTTCGGAACAGGAGAGCGCACGAGGGAGCTTCCAGGGGG  
AAACGCCTGGTATCTTTATAGTCCTGTTCGGGTTTTCGCCACCTCTGACTTGAGCG  
TCGATTTTTGTGATGCTCGTCAGGGGGGCGGAGCCTATGGAAAACGCCAGCA  
ACGCGGCCTTTTTACGGTTCCTGGCCTTTTGCTTATAAGGGATTTTGCCGATTC  
GGCCTATTGGTTAAAAAATGAGCTGATTTAACAAAAATTTAACGCGAATTTAAC  
AAAATATTAACGCTTACAATTTAGGTGGCACTTTTTCGGGGAAATGTGCGCGGAA  
CCCCTATTTGTTTATTTTTCTAAATACATTCAAATATGTATCCGCTCATGAGACAA  
TAACCCTGATAAATGCTTCAATAATATTGAAAAAGGAAGAGTATGAGTATTCAAC

ATTTCCGTGTCGCCCTTATTCCCTTTTTTGCGGCATTTCCTGTTTTTGGCT  
CACCCAGAAACGCTGGTCAAAGTAAAAGATGCTGAAGATCAGTTGGGTGCACG  
AGTGGGTTACATCGAACTGGATCTCAACAGCGGTAAGATCCTTGAGAGTTTTCG  
CCCCGAAGAACGTTTTCCAATGATGAGCACTTTTAAAGTTCTGCTATGTGGCGC  
GGTATTATCCCGTATTGACGCCGGCAAGAGCAACTCGGTCGCCGCATACTA  
TTCTCAGAATGACTTGGTTGAGTACTCACCAGTCACAGAAAAGCATCTTACGGAT  
GGCATGACAGTAAGAGAATTATGCAGTGTGCCATAACCATGAGTGATAACACT  
GCGGCCAACTTACTTCTGACAACGATCGGAGGACCGAAGGAGCTAACCGCTTTT  
TTGCACAACATGGGGGATCATGTAACCTCGCCTTGATCGTTGGGAACCGGAGCTG  
AATGAAGCCATAACCAAACGACGAGCGTGACACCACGATGCCTGTAGCAATGGC  
AACAAACGTTGCGCAAACCTATTAACCTGGCGAACTACTTACTCTAGCTTCCCGGCA  
ACAATTAATAGACTGGATGGAGGCGGATAAAGTTGCAGGACCACTTCTGCGCTC  
GGCCCTTCCGGCTGGCTGGTTTTATTGCTGATAAATCTGGAGCCGGTGAGCGTG  
GGTCTCGCGGTATCATTGCAGCACTGGGGCCAGATGGTAAGCCCTCCCGTATC  
GTAGTTATCTACACGACGGGGAGTCAGGCAACTATGGATGAACGAAATAGACAG  
ATCGCTGAGATAGGTGCCTCACTGATTAAGCATTGGTAACTGTCAGACCAAGTT  
TACTCATATATACTTTAGATTGATTTAAAACCTTCATTTTTAATTTAAAAGGATCTAG  
GTGAAGATCCTTTTTTGATAATCTCATGACCAAATCCCTTAACGTGAGTTTTTCGT  
TCCACTGAGCGTCAGACCCCGTAGAAAAGATCAAAGGATCTTCTTGAGATCCTT  
TTTTTCTGCGCGTAATCTGCTGCTTGCAAACAAAAAAACCACCGCTACCAGCGG  
TGGTTTGTGGCCGGATCAAGAGCTACCAAACCTTTTTTCCGAAGGTAACCTGGCTT  
CAGCAGAGCGCAGATACCAAATACTGTCCTTCTAGTGTAGCCGTAGTTAGGCCA  
CCACTTCAAGAACTCTGTAGCACCGCCTACATACCTCGCTCTGCTAATCCTGTTA  
CCAGTGGCTGCTGCCAGTGGCGATAAGTCGTGTCTTACCGGGTTGGACTCAAG  
ACGATAGTTACCGGATAAGGCGCAGC

|            |                                       |
|------------|---------------------------------------|
| Spacer 1a  | AAAC AGGCACCCCAGGCTTTACACTTTATGCTTCG  |
| Spacer 1b  | AAAACGAAGCATAAAGTGTAAGCCTGGGGTGCCT    |
| Spacer 2a  | AAAC TACGAGCCGGAAGCATAAAGTGTAAGCCTG   |
| Spacer 2b  | AAAACAGGCTTTACACTTTATGCTTCCGGCTCGTA   |
| Spacer 3a  | AAAC TCCGGCTCGTATGTTGTGTGAAATTGTGAGG  |
| Spacer 3b  | AAAACCTCACAATTTACACAACATACGAGCCGGA    |
| Spacer 4a  | AAAC TCCGCTCACAATTTACACAACATACGAGCG   |
| Spacer 4b  | AAAACGCTCGTATGTTGTGTGAAATTGTGAGCGGA   |
| Spacer 5a  | AAAC TGAAATTGTGAGCGGATAACAATTTACACAG  |
| Spacer 5b  | AAAACGTGTGAAATTGTTATCCGCTCACAATTTCA   |
| Spacer 6a  | AAAC AAACAGCTATGACCATGATTACGGATTACAG  |
| Spacer 6b  | AAAACGTGAATCCGTAATCATGGTCATAGCTGTTT   |
| Spacer 7a  | AAAC GGTTTTCCAGTCACGACGTTGTAAAACGAG   |
| Spacer 7b  | AAAACTCGTTTTACAACGTCGTGACTGGGAAAACC   |
| Spacer 8a  | AAAC TGAATGGCGAATGGCGCTTTGCCTGGTTTTCG |
| Spacer 8b  | AAAACGAAACCAGGCAAAGCGCCATTCGCCATTCA   |
| Spacer 9a  | AAAC ACCCGTCGGATTCTCCGTGGGAACAAACGGG  |
| Spacer 9b  | AAAACCCGTTTGTTCACGAGGAGAAATCCGACGGGT  |
| Spacer 10a | AAAC TCACATTTAATGTTGATGAAAGCTGGCTACG  |
| Spacer 10b | AAAACGTAGCCAGCTTTCATCAACATTAATGTGA    |

### Supplemental Table 2 CRISPR spacer sequences

Sequences of the oligonucleotides that were annealed together to make the oligoduplexes encoding the spacer sequences encoding the ten candidate gRNAs used in Figure 1.



|                         |                                                                                                                                                                                                     |                                                                                                                                                                                                                                                               |
|-------------------------|-----------------------------------------------------------------------------------------------------------------------------------------------------------------------------------------------------|---------------------------------------------------------------------------------------------------------------------------------------------------------------------------------------------------------------------------------------------------------------|
| RNC target top          | <u>CGGATTCACTGGCCGT</u><br><u>CGTTTTACAACGTCGT</u><br><u>GACTGGGAAAACCCTG</u><br>GC                                                                                                                 | Substrate used in EMSAs to demonstrate reconstituted sgRNA-dCas9-transposase binding to target DNA. Anneals with RNC target bottom. sgRNA hybridizes with underlined sequence.                                                                                |
| RNC target bottom       | [Cy5]-<br>GCCAGGGTTTTCCAG<br>TCACGACGTTGTAAAA<br>CGACGGCCAGTGAATC<br>CG                                                                                                                             | Substrate used in EMSAs to demonstrate reconstituted sgRNA-dCas9-transposase binding to target DNA. Anneals with RNA target top                                                                                                                               |
| Hsmar1 substrate top    | ACTAGTGGATCCCCCG<br>GGCTGCAGGAATTCTA<br><u>TTAGGTTGGTGCAAAA</u><br><u>GTAATTGCGGTTTTGG</u><br>ATCCCTGT-[Cy5]                                                                                        | Substrate used in EMSAs to demonstrate transposase binding to inverted terminal repeat (ITR). Anneals with Hsmar1 substrate bottom. ITR is underlined.                                                                                                        |
| Hsmar1 substrate bottom | ACAGGGATCCAAAACC<br><u>GCAATTACTTTTGCACC</u><br><u>AACCTAATAGAATTCCT</u><br>GCAGCCCGGGGGATC<br>CACTAGT-[Cy5]                                                                                        | Substrate used in EMSAs to demonstrate transposase binding to ITR. Anneals with Hsmar1 substrate top. ITR is underlined.                                                                                                                                      |
| sgRNA                   | <u>GUCACGACGUUGUAAA</u><br><u>ACG</u> <i>aguuuagagcua</i> <b>GA</b><br><b>AA</b> <i>UAGCAAGUAAAAU</i><br><i>AAGGCUAGUCCGUUA</i><br><i>UCAACUUGAAAAAGUG</i><br><i>GCACCGAGUCGGUGC</i><br><i>UUUU</i> | sgRNA used for reconstitution with purified dCas9-transposase. Green sequence is the spacer (crRNA targeting sequence), Italicized sequence is the scaffold composed of: i) lowercase = crRNA repeat, ii) bold = tetraloop and iii) blue = tracrRNA sequence. |

Supplemental Table 3 Oligonucleotide sequences
